# Supplementary material for: High anticholinergic burden at admission associated with in‐hospital mortality in older patients: A comparison of 19 different anticholinergic burden scales
Source: PubMed Central journal article supplement — Basic Clin Pharmacol Toxicol. 2021 Dec 6;130(2):288–300. doi: 10.1111/bcpt.13692 (PMC9299782; doi:10.1111/bcpt.13692), 2021-12-06
Supplement: BCPT-130-288-s003.pdf [file BCPT-130-288-s003.pdf]

| Supplementary Table S2: Table 1's binary approach  |                         |                         |                         |         |
|----------------------------------------------------|-------------------------|-------------------------|-------------------------|---------|
|                                                    | Overall                 | ABC Low <3              | ABC High ≥3             | p-value |
| <b>n</b>                                           | 27092                   | 25348                   | 1744                    |         |
| <b>Died, n (%)</b>                                 | 913 (3.4)               | 788 (3.1)               | 125 (7.2)               | <0.001  |
| <b>Length of stay, median days [IQR]</b>           | 6.00 [4.00, 10.00]      | 6.00 [4.00, 10.00]      | 8.00 [6.00, 13.00]      | <0.001  |
| <b>Age, mean years (±SD)</b>                       | 78.08 (7.69)            | 77.87 (7.64)            | 81.02 (7.71)            | <0.001  |
| <b>Age, n (%)</b>                                  |                         |                         |                         | <0.001  |
| 65-75 years                                        | 10932 (40.4)            | 10491 (41.4)            | 441 (25.3)              |         |
| 76-85 years                                        | 11012 (40.6)            | 10243 (40.4)            | 769 (44.1)              |         |
| 86-95 years                                        | 4958 (18.3)             | 4444 (17.5)             | 514 (29.5)              |         |
| >95 years                                          | 190 (0.7)               | 170 (0.7)               | 20 (1.1)                |         |
| <b>Female sex, n (%)</b>                           | 14014 (51.7)            | 13065 (51.5)            | 949 (54.4)              | 0.022   |
| <b>Departement, n (%)</b>                          |                         |                         |                         |         |
| Medical departement                                | 15119 (55.8)            | 13673 (53.9)            | 1446 (82.9)             | <0.001  |
| Surgical departement                               | 11973 (44.2)            | 11675 (46.1)            | 298 (17.1)              |         |
| <b>Hearing device, n (%)</b>                       |                         |                         |                         | <0.001  |
| None                                               | 15674 (57.9)            | 14673 (57.9)            | 1001 (57.4)             |         |
| Hearing device                                     | 2976 (11.0)             | 2737 (10.8)             | 239 (13.7)              |         |
| Missing                                            | 8442 (31.2)             | 7938 (31.3)             | 504 (28.9)              |         |
| <b>Visual aid, n (%)</b>                           |                         |                         |                         | 0.084   |
| None                                               | 4956 (18.3)             | 4614 (18.2)             | 342 (19.6)              |         |
| Glasses or contacts                                | 13630 (50.3)            | 12737 (50.2)            | 893 (51.2)              |         |
| Missing                                            | 8506 (31.4)             | 7997 (31.5)             | 509 (29.2)              |         |
| <b>Acute myocardial infarction, n (%)</b>          | 1442 (5.3)              | 1320 (5.2)              | 122 (7.0)               | 0.002   |
| <b>Congestive heart failure, n (%)</b>             | 4751 (17.5)             | 3629 (14.3)             | 1122 (64.3)             | <0.001  |
| <b>Peripheal vascular disease, n (%)</b>           | 3691 (13.6)             | 3375 (13.3)             | 316 (18.1)              | <0.001  |
| <b>Cerebrovascular disease, n (%)</b>              | 3462 (12.8)             | 3285 (13.0)             | 177 (10.1)              | 0.001   |
| <b>Dementia, n (%)</b>                             | 2595 (9.6)              | 2403 (9.5)              | 192 (11.0)              | 0.04    |
| <b>COPD, n (%)</b>                                 | 3041 (11.2)             | 2708 (10.7)             | 333 (19.1)              | <0.001  |
| <b>Rheumatoid disease, n (%)</b>                   | 798 (2.9)               | 744 (2.9)               | 54 (3.1)                | 0.755   |
| <b>Peptic ulcer disease, n (%)</b>                 | 542 (2.0)               | 511 (2.0)               | 31 (1.8)                | 0.549   |
| <b>Liverdisease, n (%)</b>                         | 541 (2.0)               | 491 (1.9)               | 50 (2.9)                | 0.009   |
| <b>Diabetes, n (%)</b>                             | 5692 (21.0)             | 5188 (20.5)             | 504 (28.9)              | <0.001  |
| <b>Hemiplegia, Paraplegia, n (%)</b>               | 1232 (4.5)              | 1166 (4.6)              | 66 (3.8)                | 0.128   |
| <b>Renal dysfunction, n (%)</b>                    | 6176 (22.8)             | 5367 (21.2)             | 809 (46.4)              | <0.001  |
| <b>Cancer, n (%)</b>                               | 4625 (17.1)             | 4401 (17.4)             | 224 (12.8)              | <0.001  |
| <b>Delirium, n (%)</b>                             | 1695 (6.3)              | 1547 (6.1)              | 148 (8.5)               | <0.001  |
| <b>Self-care Index, median [IQR]</b>               | 39.00 [34.00, 40.00]    | 39.00 [35.00, 40.00]    | 36.00 [31.00, 39.00]    | <0.001  |
| <b>Braden, median [IQR]</b>                        | 22.00 [20.00, 23.00]    | 22.00 [20.00, 23.00]    | 21.00 [18.00, 23.00]    | <0.001  |
| <b>Nutrition deficiency score, median [IQR]</b>    | 1.00 [1.00, 2.00]       | 1.00 [1.00, 2.00]       | 1.00 [1.00, 2.00]       | <0.001  |
| <b>Catheterisation, n (%)</b>                      | 7873 (29.1)             | 7154 (28.2)             | 719 (41.2)              | <0.001  |
| <b>Surgery during stay, n (%)</b>                  | 8676 (32.0)             | 8480 (33.5)             | 196 (11.2)              | <0.001  |
| <b>GFR [ml/min], median [IQR]</b>                  | 64.00 [45.00, 80.00]    | 65.00 [46.00, 81.00]    | 50.00 [33.50, 68.00]    | <0.001  |
| <b>Creatinine [µmol/l], median [IQR]</b>           | 87.00 [70.00, 115.50]   | 86.00 [69.50, 113.50]   | 104.50 [81.00, 143.00]  | <0.001  |
| <b>Sodium [mmol/l], median [IQR]</b>               | 138.00 [135.00, 140.00] | 138.00 [135.00, 140.00] | 138.50 [135.50, 141.00] | <0.001  |
| <b>Potassium [mmol/l], median [IQR]</b>            | 4.05 [3.80, 4.35]       | 4.05 [3.80, 4.35]       | 4.10 [3.80, 4.45]       | <0.001  |
| <b>ALAT [U/l], median [IQR]</b>                    | 20.00 [14.00, 35.00]    | 20.00 [14.00, 35.00]    | 21.00 [13.00, 39.00]    | 0.393   |
| <b>ASAT [U/l], median [IQR]</b>                    | 25.00 [20.00, 35.00]    | 25.00 [20.00, 35.00]    | 27.00 [21.00, 39.00]    | <0.001  |
| <b>CRP [mg/l], median [IQR]</b>                    | 12.00 [2.70, 56.00]     | 12.00 [2.50, 56.00]     | 16.00 [4.85, 54.98]     | <0.001  |
| <b>CRP [mg/l], n (%)</b>                           |                         |                         |                         | <0.001  |
| < 5                                                | 7884 (29.1)             | 7474 (29.5)             | 410 (23.5)              |         |
| 5-10                                               | 2680 (9.9)              | 2453 (9.7)              | 227 (13.0)              |         |
| 10-50                                              | 6070 (22.4)             | 5502 (21.7)             | 568 (32.6)              |         |
| >50                                                | 6116 (22.6)             | 5686 (22.4)             | 430 (24.7)              |         |
| Missing                                            | 4342 (16.0)             | 4233 (16.7)             | 109 (6.2)               |         |
| <b>Temperature [°C], median [IQR]</b>              | 36.55 [36.25, 36.90]    | 36.55 [36.23, 36.90]    | 36.60 [36.27, 36.90]    | 0.064   |
| <b>Systolic blood pressure [mmHg], mean (±SD)</b>  | 134.14 (19.77)          | 134.43 (19.78)          | 130.08 (19.06)          | <0.001  |
| <b>Diastolic blood pressure [mmHg], mean (±SD)</b> | 71.89 (11.67)           | 71.98 (11.67)           | 70.75 (11.73)           | <0.001  |
| <b>BMI, mean (±SD)</b>                             | 26.10 (5.25)            | 26.03 (5.16)            | 27.03 (6.26)            | <0.001  |
| <b>Polymedication, mean (±SD)</b>                  | 7.58 (3.84)             | 7.37 (3.77)             | 10.24 (3.73)            | <0.001  |
| <b>ACH burden per scale, mean (±SD)</b>            | -                       | 0.02 (0.20)             | 4.91 (2.34)             | <0.001  |

| Supplementary Table S2: Table 1's binary approach  |                         |                         |                         |         |
|----------------------------------------------------|-------------------------|-------------------------|-------------------------|---------|
|                                                    | Overall                 | AEC Low <3              | AEC High ≥3             | p-value |
| <b>n</b>                                           | 27092                   | 25512                   | 1580                    |         |
| <b>Died, n (%)</b>                                 | 913 (3.4)               | 814 (3.2)               | 99 (6.3)                | <0.001  |
| <b>Length of stay, median days [IQR]</b>           | 6.00 [4.00, 10.00]      | 6.00 [4.00, 10.00]      | 7.00 [5.00, 11.00]      | <0.001  |
| <b>Age, mean years (±SD)</b>                       | 78.08 (7.69)            | 77.92 (7.67)            | 80.56 (7.55)            | <0.001  |
| <b>Age, n (%)</b>                                  |                         |                         |                         | <0.001  |
| 65-75 years                                        | 10932 (40.4)            | 10504 (41.2)            | 428 (27.1)              |         |
| 76-85 years                                        | 11012 (40.6)            | 10305 (40.4)            | 707 (44.7)              |         |
| 86-95 years                                        | 4958 (18.3)             | 4535 (17.8)             | 423 (26.8)              |         |
| >95 years                                          | 190 (0.7)               | 168 (0.7)               | 22 (1.4)                |         |
| <b>Female sex, n (%)</b>                           | 14014 (51.7)            | 13144 (51.5)            | 870 (55.1)              | 0.007   |
| <b>Departement, n (%)</b>                          |                         |                         |                         |         |
| Medical departement                                | 15119 (55.8)            | 13962 (54.7)            | 1157 (73.2)             | <0.001  |
| Surgical departement                               | 11973 (44.2)            | 11550 (45.3)            | 423 (26.8)              |         |
| <b>Hearing device, n (%)</b>                       |                         |                         |                         | 0.037   |
| None                                               | 15674 (57.9)            | 14751 (57.8)            | 923 (58.4)              |         |
| Hearing device                                     | 2976 (11.0)             | 2777 (10.9)             | 199 (12.6)              |         |
| Missing                                            | 8442 (31.2)             | 7984 (31.3)             | 458 (29.0)              |         |
| <b>Visual aid, n (%)</b>                           |                         |                         |                         | <0.001  |
| None                                               | 4956 (18.3)             | 4576 (17.9)             | 380 (24.1)              |         |
| Glasses or contacts                                | 13630 (50.3)            | 12890 (50.5)            | 740 (46.8)              |         |
| Missing                                            | 8506 (31.4)             | 8046 (31.5)             | 460 (29.1)              |         |
| <b>Acute myocardial infarction, n (%)</b>          | 1442 (5.3)              | 1374 (5.4)              | 68 (4.3)                | 0.072   |
| <b>Congestive heart failure, n (%)</b>             | 4751 (17.5)             | 4369 (17.1)             | 382 (24.2)              | <0.001  |
| <b>Peripheal vascular disease, n (%)</b>           | 3691 (13.6)             | 3472 (13.6)             | 219 (13.9)              | 0.806   |
| <b>Cerebrovascular disease, n (%)</b>              | 3462 (12.8)             | 3238 (12.7)             | 224 (14.2)              | 0.094   |
| <b>Dementia, n (%)</b>                             | 2595 (9.6)              | 2092 (8.2)              | 503 (31.8)              | <0.001  |
| <b>COPD, n (%)</b>                                 | 3041 (11.2)             | 2847 (11.2)             | 194 (12.3)              | 0.185   |
| <b>Rheumatoid disease, n (%)</b>                   | 798 (2.9)               | 729 (2.9)               | 69 (4.4)                | 0.001   |
| <b>Peptic ulcer disease, n (%)</b>                 | 542 (2.0)               | 505 (2.0)               | 37 (2.3)                | 0.365   |
| <b>Liverdisease, n (%)</b>                         | 541 (2.0)               | 511 (2.0)               | 30 (1.9)                | 0.846   |
| <b>Diabetes, n (%)</b>                             | 5692 (21.0)             | 5324 (20.9)             | 368 (23.3)              | 0.024   |
| <b>Hemiplegia, Paraplegia, n (%)</b>               | 1232 (4.5)              | 1137 (4.5)              | 95 (6.0)                | 0.005   |
| <b>Renal dysfunction, n (%)</b>                    | 6176 (22.8)             | 5678 (22.3)             | 498 (31.5)              | <0.001  |
| <b>Cancer, n (%)</b>                               | 4625 (17.1)             | 4366 (17.1)             | 259 (16.4)              | 0.481   |
| <b>Delirium, n (%)</b>                             | 1695 (6.3)              | 1367 (5.4)              | 328 (20.8)              | <0.001  |
| <b>Self-care Index, median [IQR]</b>               | 39.00 [34.00, 40.00]    | 39.00 [35.00, 40.00]    | 34.00 [27.00, 39.00]    | <0.001  |
| <b>Braden, median [IQR]</b>                        | 22.00 [20.00, 23.00]    | 22.00 [20.00, 23.00]    | 20.00 [17.00, 22.00]    | <0.001  |
| <b>Nutrition deficiency score, median [IQR]</b>    | 1.00 [1.00, 2.00]       | 1.00 [1.00, 2.00]       | 1.00 [1.00, 3.00]       | <0.001  |
| <b>Catheterisation, n (%)</b>                      | 7873 (29.1)             | 7389 (29.0)             | 484 (30.6)              | 0.164   |
| <b>Surgery during stay, n (%)</b>                  | 8676 (32.0)             | 8387 (32.9)             | 289 (18.3)              | <0.001  |
| <b>GFR [ml/min], median [IQR]</b>                  | 64.00 [45.00, 80.00]    | 64.00 [45.00, 80.50]    | 59.50 [40.67, 78.00]    | <0.001  |
| <b>Creatinine [µmol/l], median [IQR]</b>           | 87.00 [70.00, 115.50]   | 87.00 [70.00, 115.00]   | 90.50 [70.00, 120.25]   | 0.056   |
| <b>Sodium [mmol/l], median [IQR]</b>               | 138.00 [135.00, 140.00] | 138.00 [135.00, 140.00] | 138.00 [135.00, 140.50] | 0.041   |
| <b>Potassium [mmol/l], median [IQR]</b>            | 4.05 [3.80, 4.35]       | 4.05 [3.80, 4.35]       | 4.10 [3.70, 4.40]       | 0.718   |
| <b>ALAT [U/l], median [IQR]</b>                    | 20.00 [14.00, 35.00]    | 20.00 [14.00, 36.00]    | 19.00 [12.00, 32.75]    | 0.003   |
| <b>ASAT [U/l], median [IQR]</b>                    | 25.00 [20.00, 35.00]    | 25.00 [20.00, 35.00]    | 25.00 [19.00, 34.00]    | 0.005   |
| <b>CRP [mg/l], median [IQR]</b>                    | 12.00 [2.70, 56.00]     | 12.00 [2.55, 55.25]     | 17.50 [4.00, 63.50]     | <0.001  |
| <b>CRP [mg/l], n (%)</b>                           |                         |                         |                         | <0.001  |
| < 5                                                | 7884 (29.1)             | 7512 (29.4)             | 372 (23.5)              |         |
| 5-10                                               | 2680 (9.9)              | 2531 (9.9)              | 149 (9.4)               |         |
| 10-50                                              | 6070 (22.4)             | 5670 (22.2)             | 400 (25.3)              |         |
| >50                                                | 6116 (22.6)             | 5724 (22.4)             | 392 (24.8)              |         |
| Missing                                            | 4342 (16.0)             | 4075 (16.0)             | 267 (16.9)              |         |
| <b>Temperature [°C], median [IQR]</b>              | 36.55 [36.25, 36.90]    | 36.55 [36.23, 36.90]    | 36.65 [36.30, 37.00]    | <0.001  |
| <b>Systolic blood pressure [mmHg], mean (±SD)</b>  | 134.14 (19.77)          | 134.35 (19.79)          | 130.91 (19.14)          | <0.001  |
| <b>Diastolic blood pressure [mmHg], mean (±SD)</b> | 71.89 (11.67)           | 72.02 (11.69)           | 70.00 (11.25)           | <0.001  |
| <b>BMI, mean (±SD)</b>                             | 26.10 (5.25)            | 26.12 (5.22)            | 25.63 (5.87)            | 0.005   |
| <b>Polymedication, mean (±SD)</b>                  | 7.58 (3.84)             | 7.37 (3.74)             | 10.59 (3.98)            | <0.001  |
| <b>ACH burden per scale, mean (±SD)</b>            | -                       | 0.25 (0.57)             | 4.51 (1.97)             | <0.001  |

| Supplementary Table S2: Table 1's binary approach  |                         |                         |                         |         |
|----------------------------------------------------|-------------------------|-------------------------|-------------------------|---------|
|                                                    | Overall                 | ACB Low <3              | ACB High ≥3             | p-value |
| <b>n</b>                                           | 27092                   | 22013                   | 5079                    |         |
| <b>Died, n (%)</b>                                 | 913 (3.4)               | 630 (2.9)               | 283 (5.6)               | <0.001  |
| <b>Length of stay, median days [IQR]</b>           | 6.00 [4.00, 10.00]      | 6.00 [4.00, 10.00]      | 7.00 [4.00, 11.00]      | <0.001  |
| <b>Age, mean years (±SD)</b>                       | 78.08 (7.69)            | 77.70 (7.61)            | 79.70 (7.78)            | <0.001  |
| <b>Age, n (%)</b>                                  |                         |                         |                         | <0.001  |
| 65-75 years                                        | 10932 (40.4)            | 9306 (42.3)             | 1626 (32.0)             |         |
| 76-85 years                                        | 11012 (40.6)            | 8847 (40.2)             | 2165 (42.6)             |         |
| 86-95 years                                        | 4958 (18.3)             | 3722 (16.9)             | 1236 (24.3)             |         |
| >95 years                                          | 190 (0.7)               | 138 (0.6)               | 52 (1.0)                |         |
| <b>Female sex, n (%)</b>                           | 14014 (51.7)            | 11256 (51.1)            | 2758 (54.3)             | <0.001  |
| <b>Departement, n (%)</b>                          |                         |                         |                         |         |
| Medical departement                                | 15119 (55.8)            | 12008 (54.5)            | 3111 (61.3)             | <0.001  |
| Surgical departement                               | 11973 (44.2)            | 10005 (45.5)            | 1968 (38.7)             |         |
| <b>Hearing device, n (%)</b>                       |                         |                         |                         | <0.001  |
| None                                               | 15674 (57.9)            | 12630 (57.4)            | 3044 (59.9)             |         |
| Hearing device                                     | 2976 (11.0)             | 2359 (10.7)             | 617 (12.1)              |         |
| Missing                                            | 8442 (31.2)             | 7024 (31.9)             | 1418 (27.9)             |         |
| <b>Visual aid, n (%)</b>                           |                         |                         |                         | <0.001  |
| None                                               | 4956 (18.3)             | 3885 (17.6)             | 1071 (21.1)             |         |
| Glasses or contacts                                | 13630 (50.3)            | 11042 (50.2)            | 2588 (51.0)             |         |
| Missing                                            | 8506 (31.4)             | 7086 (32.2)             | 1420 (28.0)             |         |
| <b>Acute myocardial infarction, n (%)</b>          | 1442 (5.3)              | 1183 (5.4)              | 259 (5.1)               | 0.452   |
| <b>Congestive heart failure, n (%)</b>             | 4751 (17.5)             | 3492 (15.9)             | 1259 (24.8)             | <0.001  |
| <b>Peripheal vascular disease, n (%)</b>           | 3691 (13.6)             | 2942 (13.4)             | 749 (14.7)              | 0.01    |
| <b>Cerebrovascular disease, n (%)</b>              | 3462 (12.8)             | 2861 (13.0)             | 601 (11.8)              | 0.027   |
| <b>Dementia, n (%)</b>                             | 2595 (9.6)              | 1593 (7.2)              | 1002 (19.7)             | <0.001  |
| <b>COPD, n (%)</b>                                 | 3041 (11.2)             | 2390 (10.9)             | 651 (12.8)              | <0.001  |
| <b>Rheumatoid disease, n (%)</b>                   | 798 (2.9)               | 602 (2.7)               | 196 (3.9)               | <0.001  |
| <b>Peptic ulcer disease, n (%)</b>                 | 542 (2.0)               | 448 (2.0)               | 94 (1.9)                | 0.429   |
| <b>Liverdisease, n (%)</b>                         | 541 (2.0)               | 461 (2.1)               | 80 (1.6)                | 0.02    |
| <b>Diabetes, n (%)</b>                             | 5692 (21.0)             | 4511 (20.5)             | 1181 (23.3)             | <0.001  |
| <b>Hemiplegia, Paraplegia, n (%)</b>               | 1232 (4.5)              | 992 (4.5)               | 240 (4.7)               | 0.524   |
| <b>Renal dysfunction, n (%)</b>                    | 6176 (22.8)             | 4723 (21.5)             | 1453 (28.6)             | <0.001  |
| <b>Cancer, n (%)</b>                               | 4625 (17.1)             | 3798 (17.3)             | 827 (16.3)              | 0.102   |
| <b>Delirium, n (%)</b>                             | 1695 (6.3)              | 1026 (4.7)              | 669 (13.2)              | <0.001  |
| <b>Self-care Index, median [IQR]</b>               | 39.00 [34.00, 40.00]    | 39.00 [35.00, 40.00]    | 36.00 [31.00, 40.00]    | <0.001  |
| <b>Braden, median [IQR]</b>                        | 22.00 [20.00, 23.00]    | 22.00 [20.00, 23.00]    | 21.00 [18.00, 23.00]    | <0.001  |
| <b>Nutrition deficiency score, median [IQR]</b>    | 1.00 [1.00, 2.00]       | 1.00 [1.00, 2.00]       | 1.00 [1.00, 2.00]       | <0.001  |
| <b>Catheterisation, n (%)</b>                      | 7873 (29.1)             | 6128 (27.8)             | 1745 (34.4)             | <0.001  |
| <b>Surgery during stay, n (%)</b>                  | 8676 (32.0)             | 7301 (33.2)             | 1375 (27.1)             | <0.001  |
| <b>GFR [ml/min], median [IQR]</b>                  | 64.00 [45.00, 80.00]    | 64.50 [46.00, 81.00]    | 60.00 [41.00, 78.00]    | <0.001  |
| <b>Creatinine [µmol/l], median [IQR]</b>           | 87.00 [70.00, 115.50]   | 87.00 [70.00, 114.00]   | 90.00 [71.00, 120.00]   | <0.001  |
| <b>Sodium [mmol/l], median [IQR]</b>               | 138.00 [135.00, 140.00] | 138.00 [135.00, 140.00] | 138.00 [135.00, 140.00] | 0.039   |
| <b>Potassium [mmol/l], median [IQR]</b>            | 4.05 [3.80, 4.35]       | 4.05 [3.80, 4.35]       | 4.10 [3.80, 4.40]       | 0.006   |
| <b>ALAT [U/l], median [IQR]</b>                    | 20.00 [14.00, 35.00]    | 21.00 [14.00, 36.00]    | 19.00 [13.00, 33.00]    | <0.001  |
| <b>ASAT [U/l], median [IQR]</b>                    | 25.00 [20.00, 35.00]    | 25.00 [20.00, 35.00]    | 25.00 [20.00, 34.00]    | 0.003   |
| <b>CRP [mg/l], median [IQR]</b>                    | 12.00 [2.70, 56.00]     | 11.30 [2.40, 55.27]     | 15.00 [3.60, 57.50]     | <0.001  |
| <b>CRP [mg/l], n (%)</b>                           |                         |                         |                         | <0.001  |
| < 5                                                | 7884 (29.1)             | 6643 (30.2)             | 1241 (24.4)             |         |
| 5-10                                               | 2680 (9.9)              | 2142 (9.7)              | 538 (10.6)              |         |
| 10-50                                              | 6070 (22.4)             | 4771 (21.7)             | 1299 (25.6)             |         |
| >50                                                | 6116 (22.6)             | 4939 (22.4)             | 1177 (23.2)             |         |
| Missing                                            | 4342 (16.0)             | 3518 (16.0)             | 824 (16.2)              |         |
| <b>Temperature [°C], median [IQR]</b>              | 36.55 [36.25, 36.90]    | 36.55 [36.23, 36.90]    | 36.60 [36.30, 36.95]    | <0.001  |
| <b>Systolic blood pressure [mmHg], mean (±SD)</b>  | 134.14 (19.77)          | 134.40 (19.88)          | 133.07 (19.28)          | <0.001  |
| <b>Diastolic blood pressure [mmHg], mean (±SD)</b> | 71.89 (11.67)           | 72.11 (11.79)           | 71.01 (11.13)           | <0.001  |
| <b>BMI, mean (±SD)</b>                             | 26.10 (5.25)            | 26.09 (5.16)            | 26.12 (5.64)            | 0.818   |
| <b>Polymedication, mean (±SD)</b>                  | 7.58 (3.84)             | 6.97 (3.61)             | 9.87 (3.83)             | <0.001  |
| <b>ACH burden per scale, mean (±SD)</b>            | -                       | 0.36 (0.64)             | 4.89 (2.79)             | <0.001  |

| Supplementary Table S2: Table 1's binary approach  |                         |                         |                         |         |
|----------------------------------------------------|-------------------------|-------------------------|-------------------------|---------|
|                                                    | Overall                 | AIS Low <3              | AIS High ≥3             | p-value |
| <b>n</b>                                           | 27092                   | 19343                   | 7749                    |         |
| <b>Died, n (%)</b>                                 | 913 (3.4)               | 507 (2.6)               | 406 (5.2)               | <0.001  |
| <b>Length of stay, median days [IQR]</b>           | 6.00 [4.00, 10.00]      | 6.00 [4.00, 10.00]      | 7.00 [5.00, 11.00]      | <0.001  |
| <b>Age, mean years (±SD)</b>                       | 78.08 (7.69)            | 77.75 (7.64)            | 78.89 (7.74)            | <0.001  |
| <b>Age, n (%)</b>                                  |                         |                         |                         | <0.001  |
| 65-75 years                                        | 10932 (40.4)            | 8146 (42.1)             | 2786 (36.0)             |         |
| 76-85 years                                        | 11012 (40.6)            | 7777 (40.2)             | 3235 (41.7)             |         |
| 86-95 years                                        | 4958 (18.3)             | 3298 (17.1)             | 1660 (21.4)             |         |
| >95 years                                          | 190 (0.7)               | 122 (0.6)               | 68 (0.9)                |         |
| <b>Female sex, n (%)</b>                           | 14014 (51.7)            | 9763 (50.5)             | 4251 (54.9)             | <0.001  |
| <b>Departement, n (%)</b>                          |                         |                         |                         |         |
| Medical departement                                | 15119 (55.8)            | 10219 (52.8)            | 4900 (63.2)             | <0.001  |
| Surgical departement                               | 11973 (44.2)            | 9124 (47.2)             | 2849 (36.8)             |         |
| <b>Hearing device, n (%)</b>                       |                         |                         |                         | <0.001  |
| None                                               | 15674 (57.9)            | 10985 (56.8)            | 4689 (60.5)             |         |
| Hearing device                                     | 2976 (11.0)             | 2078 (10.7)             | 898 (11.6)              |         |
| Missing                                            | 8442 (31.2)             | 6280 (32.5)             | 2162 (27.9)             |         |
| <b>Visual aid, n (%)</b>                           |                         |                         |                         | <0.001  |
| None                                               | 4956 (18.3)             | 3354 (17.3)             | 1602 (20.7)             |         |
| Glasses or contacts                                | 13630 (50.3)            | 9652 (49.9)             | 3978 (51.3)             |         |
| Missing                                            | 8506 (31.4)             | 6337 (32.8)             | 2169 (28.0)             |         |
| <b>Acute myocardial infarction, n (%)</b>          | 1442 (5.3)              | 1063 (5.5)              | 379 (4.9)               | 0.048   |
| <b>Congestive heart failure, n (%)</b>             | 4751 (17.5)             | 3073 (15.9)             | 1678 (21.7)             | <0.001  |
| <b>Peripheal vascular disease, n (%)</b>           | 3691 (13.6)             | 2503 (12.9)             | 1188 (15.3)             | <0.001  |
| <b>Cerebrovascular disease, n (%)</b>              | 3462 (12.8)             | 2617 (13.5)             | 845 (10.9)              | <0.001  |
| <b>Dementia, n (%)</b>                             | 2595 (9.6)              | 1494 (7.7)              | 1101 (14.2)             | <0.001  |
| <b>COPD, n (%)</b>                                 | 3041 (11.2)             | 1587 (8.2)              | 1454 (18.8)             | <0.001  |
| <b>Rheumatoid disease, n (%)</b>                   | 798 (2.9)               | 460 (2.4)               | 338 (4.4)               | <0.001  |
| <b>Peptic ulcer disease, n (%)</b>                 | 542 (2.0)               | 379 (2.0)               | 163 (2.1)               | 0.473   |
| <b>Liverdisease, n (%)</b>                         | 541 (2.0)               | 406 (2.1)               | 135 (1.7)               | 0.064   |
| <b>Diabetes, n (%)</b>                             | 5692 (21.0)             | 3929 (20.3)             | 1763 (22.8)             | <0.001  |
| <b>Hemiplegia, Paraplegia, n (%)</b>               | 1232 (4.5)              | 890 (4.6)               | 342 (4.4)               | 0.524   |
| <b>Renal dysfunction, n (%)</b>                    | 6176 (22.8)             | 4096 (21.2)             | 2080 (26.8)             | <0.001  |
| <b>Cancer, n (%)</b>                               | 4625 (17.1)             | 3274 (16.9)             | 1351 (17.4)             | 0.323   |
| <b>Delirium, n (%)</b>                             | 1695 (6.3)              | 950 (4.9)               | 745 (9.6)               | <0.001  |
| <b>Self-care Index, median [IQR]</b>               | 39.00 [34.00, 40.00]    | 39.00 [36.00, 40.00]    | 36.00 [31.00, 40.00]    | <0.001  |
| <b>Braden, median [IQR]</b>                        | 22.00 [20.00, 23.00]    | 23.00 [21.00, 23.00]    | 21.00 [18.00, 23.00]    | <0.001  |
| <b>Nutrition deficiency score, median [IQR]</b>    | 1.00 [1.00, 2.00]       | 1.00 [1.00, 1.00]       | 1.00 [1.00, 2.00]       | <0.001  |
| <b>Catheterisation, n (%)</b>                      | 7873 (29.1)             | 5675 (29.3)             | 2198 (28.4)             | 0.114   |
| <b>Surgery during stay, n (%)</b>                  | 8676 (32.0)             | 6827 (35.3)             | 1849 (23.9)             | <0.001  |
| <b>GFR [ml/min], median [IQR]</b>                  | 64.00 [45.00, 80.00]    | 64.00 [45.50, 80.50]    | 62.50 [44.00, 80.00]    | 0.014   |
| <b>Creatinine [µmol/l], median [IQR]</b>           | 87.00 [70.00, 115.50]   | 87.00 [70.50, 115.00]   | 87.00 [69.00, 117.00]   | 0.217   |
| <b>Sodium [mmol/l], median [IQR]</b>               | 138.00 [135.00, 140.00] | 138.00 [135.50, 140.00] | 138.00 [135.00, 140.00] | <0.001  |
| <b>Potassium [mmol/l], median [IQR]</b>            | 4.05 [3.80, 4.35]       | 4.05 [3.80, 4.35]       | 4.05 [3.75, 4.40]       | 0.921   |
| <b>ALAT [U/l], median [IQR]</b>                    | 20.00 [14.00, 35.00]    | 21.00 [14.00, 36.00]    | 20.00 [13.00, 34.00]    | 0.014   |
| <b>ASAT [U/l], median [IQR]</b>                    | 25.00 [20.00, 35.00]    | 25.00 [20.00, 35.00]    | 25.00 [20.00, 35.00]    | 0.201   |
| <b>CRP [mg/l], median [IQR]</b>                    | 12.00 [2.70, 56.00]     | 9.60 [2.00, 48.00]      | 21.00 [4.40, 72.00]     | <0.001  |
| <b>CRP [mg/l], n (%)</b>                           |                         |                         |                         | <0.001  |
| < 5                                                | 7884 (29.1)             | 6117 (31.6)             | 1767 (22.8)             |         |
| 5-10                                               | 2680 (9.9)              | 1907 (9.9)              | 773 (10.0)              |         |
| 10-50                                              | 6070 (22.4)             | 4055 (21.0)             | 2015 (26.0)             |         |
| >50                                                | 6116 (22.6)             | 3852 (19.9)             | 2264 (29.2)             |         |
| Missing                                            | 4342 (16.0)             | 3412 (17.6)             | 930 (12.0)              |         |
| <b>Temperature [°C], median [IQR]</b>              | 36.55 [36.25, 36.90]    | 36.50 [36.20, 36.90]    | 36.60 [36.30, 37.00]    | <0.001  |
| <b>Systolic blood pressure [mmHg], mean (±SD)</b>  | 134.14 (19.77)          | 134.79 (19.88)          | 132.61 (19.43)          | <0.001  |
| <b>Diastolic blood pressure [mmHg], mean (±SD)</b> | 71.89 (11.67)           | 72.49 (11.90)           | 70.51 (11.00)           | <0.001  |
| <b>BMI, mean (±SD)</b>                             | 26.10 (5.25)            | 26.15 (5.07)            | 25.98 (5.69)            | 0.059   |
| <b>Polymedication, mean (±SD)</b>                  | 7.58 (3.84)             | 6.40 (3.29)             | 10.11 (3.72)            | <0.001  |
| <b>ACH burden per scale, mean (±SD)</b>            | -                       | 0.57 (0.76)             | 6.09 (3.58)             | <0.001  |

| Supplementary Table S2: Table 1's binary approach  |                         |                         |                         |         |
|----------------------------------------------------|-------------------------|-------------------------|-------------------------|---------|
|                                                    | Overall                 | CABS Low <3             | CABS High ≥3            | p-value |
| <b>n</b>                                           | 27092                   | 24820                   | 2272                    |         |
| <b>Died, n (%)</b>                                 | 913 (3.4)               | 770 (3.1)               | 143 (6.3)               | <0.001  |
| <b>Length of stay, median days [IQR]</b>           | 6.00 [4.00, 10.00]      | 6.00 [4.00, 10.00]      | 8.00 [5.00, 12.00]      | <0.001  |
| <b>Age, mean years (±SD)</b>                       | 78.08 (7.69)            | 77.89 (7.65)            | 80.13 (7.81)            | <0.001  |
| <b>Age, n (%)</b>                                  |                         |                         |                         | <0.001  |
| 65-75 years                                        | 10932 (40.4)            | 10260 (41.3)            | 672 (29.6)              |         |
| 76-85 years                                        | 11012 (40.6)            | 10031 (40.4)            | 981 (43.2)              |         |
| 86-95 years                                        | 4958 (18.3)             | 4362 (17.6)             | 596 (26.2)              |         |
| >95 years                                          | 190 (0.7)               | 167 (0.7)               | 23 (1.0)                |         |
| <b>Female sex, n (%)</b>                           | 14014 (51.7)            | 12850 (51.8)            | 1164 (51.2)             | 0.637   |
| <b>Departement, n (%)</b>                          |                         |                         |                         |         |
| Medical departement                                | 15119 (55.8)            | 13069 (52.7)            | 2050 (90.2)             | <0.001  |
| Surgical departement                               | 11973 (44.2)            | 11751 (47.3)            | 222 (9.8)               |         |
| <b>Hearing device, n (%)</b>                       |                         |                         |                         | 0.008   |
| None                                               | 15674 (57.9)            | 14393 (58.0)            | 1281 (56.4)             |         |
| Hearing device                                     | 2976 (11.0)             | 2682 (10.8)             | 294 (12.9)              |         |
| Missing                                            | 8442 (31.2)             | 7745 (31.2)             | 697 (30.7)              |         |
| <b>Visual aid, n (%)</b>                           |                         |                         |                         | <0.001  |
| None                                               | 4956 (18.3)             | 4470 (18.0)             | 486 (21.4)              |         |
| Glasses or contacts                                | 13630 (50.3)            | 12548 (50.6)            | 1082 (47.6)             |         |
| Missing                                            | 8506 (31.4)             | 7802 (31.4)             | 704 (31.0)              |         |
| <b>Acute myocardial infarction, n (%)</b>          | 1442 (5.3)              | 1310 (5.3)              | 132 (5.8)               | 0.302   |
| <b>Congestive heart failure, n (%)</b>             | 4751 (17.5)             | 3631 (14.6)             | 1120 (49.3)             | <0.001  |
| <b>Peripheal vascular disease, n (%)</b>           | 3691 (13.6)             | 3325 (13.4)             | 366 (16.1)              | <0.001  |
| <b>Cerebrovascular disease, n (%)</b>              | 3462 (12.8)             | 3245 (13.1)             | 217 (9.6)               | <0.001  |
| <b>Dementia, n (%)</b>                             | 2595 (9.6)              | 2357 (9.5)              | 238 (10.5)              | 0.139   |
| <b>COPD, n (%)</b>                                 | 3041 (11.2)             | 2180 (8.8)              | 861 (37.9)              | <0.001  |
| <b>Rheumatoid disease, n (%)</b>                   | 798 (2.9)               | 723 (2.9)               | 75 (3.3)                | 0.326   |
| <b>Peptic ulcer disease, n (%)</b>                 | 542 (2.0)               | 504 (2.0)               | 38 (1.7)                | 0.276   |
| <b>Liverdisease, n (%)</b>                         | 541 (2.0)               | 496 (2.0)               | 45 (2.0)                | 1       |
| <b>Diabetes, n (%)</b>                             | 5692 (21.0)             | 5092 (20.5)             | 600 (26.4)              | <0.001  |
| <b>Hemiplegia, Paraplegia, n (%)</b>               | 1232 (4.5)              | 1138 (4.6)              | 94 (4.1)                | 0.354   |
| <b>Renal dysfunction, n (%)</b>                    | 6176 (22.8)             | 5305 (21.4)             | 871 (38.3)              | <0.001  |
| <b>Cancer, n (%)</b>                               | 4625 (17.1)             | 4384 (17.7)             | 241 (10.6)              | <0.001  |
| <b>Delirium, n (%)</b>                             | 1695 (6.3)              | 1535 (6.2)              | 160 (7.0)               | 0.116   |
| <b>Self-care Index, median [IQR]</b>               | 39.00 [34.00, 40.00]    | 39.00 [35.00, 40.00]    | 35.00 [30.00, 39.00]    | <0.001  |
| <b>Braden, median [IQR]</b>                        | 22.00 [20.00, 23.00]    | 22.00 [20.00, 23.00]    | 21.00 [18.00, 23.00]    | <0.001  |
| <b>Nutrition deficiency score, median [IQR]</b>    | 1.00 [1.00, 2.00]       | 1.00 [1.00, 2.00]       | 1.00 [1.00, 2.00]       | <0.001  |
| <b>Catheterisation, n (%)</b>                      | 7873 (29.1)             | 7160 (28.8)             | 713 (31.4)              | 0.012   |
| <b>Surgery during stay, n (%)</b>                  | 8676 (32.0)             | 8525 (34.3)             | 151 (6.6)               | <0.001  |
| <b>GFR [ml/min], median [IQR]</b>                  | 64.00 [45.00, 80.00]    | 64.00 [46.00, 81.00]    | 57.00 [39.00, 76.00]    | <0.001  |
| <b>Creatinine [µmol/l], median [IQR]</b>           | 87.00 [70.00, 115.50]   | 86.50 [70.00, 114.00]   | 95.25 [73.50, 127.00]   | <0.001  |
| <b>Sodium [mmol/l], median [IQR]</b>               | 138.00 [135.00, 140.00] | 138.00 [135.00, 140.00] | 138.00 [135.00, 140.50] | 0.015   |
| <b>Potassium [mmol/l], median [IQR]</b>            | 4.05 [3.80, 4.35]       | 4.05 [3.80, 4.35]       | 4.10 [3.75, 4.40]       | 0.079   |
| <b>ALAT [U/l], median [IQR]</b>                    | 20.00 [14.00, 35.00]    | 20.00 [14.00, 35.00]    | 21.00 [13.00, 35.00]    | 0.772   |
| <b>ASAT [U/l], median [IQR]</b>                    | 25.00 [20.00, 35.00]    | 25.00 [20.00, 35.00]    | 26.00 [20.88, 36.00]    | 0.002   |
| <b>CRP [mg/l], median [IQR]</b>                    | 12.00 [2.70, 56.00]     | 11.00 [2.30, 52.50]     | 30.00 [8.11, 81.00]     | <0.001  |
| <b>CRP [mg/l], n (%)</b>                           |                         |                         |                         | <0.001  |
| < 5                                                | 7884 (29.1)             | 7510 (30.3)             | 374 (16.5)              |         |
| 5-10                                               | 2680 (9.9)              | 2439 (9.8)              | 241 (10.6)              |         |
| 10-50                                              | 6070 (22.4)             | 5313 (21.4)             | 757 (33.3)              |         |
| >50                                                | 6116 (22.6)             | 5302 (21.4)             | 814 (35.8)              |         |
| Missing                                            | 4342 (16.0)             | 4256 (17.1)             | 86 (3.8)                |         |
| <b>Temperature [°C], median [IQR]</b>              | 36.55 [36.25, 36.90]    | 36.55 [36.20, 36.90]    | 36.70 [36.33, 37.10]    | <0.001  |
| <b>Systolic blood pressure [mmHg], mean (±SD)</b>  | 134.14 (19.77)          | 134.52 (19.80)          | 130.14 (18.93)          | <0.001  |
| <b>Diastolic blood pressure [mmHg], mean (±SD)</b> | 71.89 (11.67)           | 72.04 (11.72)           | 70.34 (11.01)           | <0.001  |
| <b>BMI, mean (±SD)</b>                             | 26.10 (5.25)            | 26.07 (5.16)            | 26.42 (6.14)            | 0.013   |
| <b>Polymedication, mean (±SD)</b>                  | 7.58 (3.84)             | 7.27 (3.71)             | 10.52 (3.86)            | <0.001  |
| <b>ACH burden per scale, mean (±SD)</b>            | -                       | 0.11 (0.46)             | 5.48 (2.09)             | <0.001  |

| Supplementary Table S2: Table 1's binary approach  |                         |                         |                         |         |
|----------------------------------------------------|-------------------------|-------------------------|-------------------------|---------|
|                                                    | Overall                 | Chew Low <3             | Chew High ≥3            | p-value |
| <b>n</b>                                           | 27092                   | 24534                   | 2558                    |         |
| <b>Died, n (%)</b>                                 | 913 (3.4)               | 768 (3.1)               | 145 (5.7)               | <0.001  |
| <b>Length of stay, median days [IQR]</b>           | 6.00 [4.00, 10.00]      | 6.00 [4.00, 10.00]      | 8.00 [5.00, 13.00]      | <0.001  |
| <b>Age, mean years (±SD)</b>                       | 78.08 (7.69)            | 77.93 (7.67)            | 79.49 (7.66)            | <0.001  |
| <b>Age, n (%)</b>                                  |                         |                         |                         | <0.001  |
| 65-75 years                                        | 10932 (40.4)            | 10110 (41.2)            | 822 (32.1)              |         |
| 76-85 years                                        | 11012 (40.6)            | 9898 (40.3)             | 1114 (43.5)             |         |
| 86-95 years                                        | 4958 (18.3)             | 4356 (17.8)             | 602 (23.5)              |         |
| >95 years                                          | 190 (0.7)               | 170 (0.7)               | 20 (0.8)                |         |
| <b>Female sex, n (%)</b>                           | 14014 (51.7)            | 12590 (51.3)            | 1424 (55.7)             | <0.001  |
| <b>Departement, n (%)</b>                          |                         |                         |                         |         |
| Medical departement                                | 15119 (55.8)            | 13418 (54.7)            | 1701 (66.5)             | <0.001  |
| Surgical departement                               | 11973 (44.2)            | 11116 (45.3)            | 857 (33.5)              |         |
| <b>Hearing device, n (%)</b>                       |                         |                         |                         | 0.002   |
| None                                               | 15674 (57.9)            | 14127 (57.6)            | 1547 (60.5)             |         |
| Hearing device                                     | 2976 (11.0)             | 2682 (10.9)             | 294 (11.5)              |         |
| Missing                                            | 8442 (31.2)             | 7725 (31.5)             | 717 (28.0)              |         |
| <b>Visual aid, n (%)</b>                           |                         |                         |                         | <0.001  |
| None                                               | 4956 (18.3)             | 4435 (18.1)             | 521 (20.4)              |         |
| Glasses or contacts                                | 13630 (50.3)            | 12319 (50.2)            | 1311 (51.3)             |         |
| Missing                                            | 8506 (31.4)             | 7780 (31.7)             | 726 (28.4)              |         |
| <b>Acute myocardial infarction, n (%)</b>          | 1442 (5.3)              | 1324 (5.4)              | 118 (4.6)               | 0.102   |
| <b>Congestive heart failure, n (%)</b>             | 4751 (17.5)             | 3998 (16.3)             | 753 (29.4)              | <0.001  |
| <b>Peripheal vascular disease, n (%)</b>           | 3691 (13.6)             | 3226 (13.1)             | 465 (18.2)              | <0.001  |
| <b>Cerebrovascular disease, n (%)</b>              | 3462 (12.8)             | 3136 (12.8)             | 326 (12.7)              | 0.981   |
| <b>Dementia, n (%)</b>                             | 2595 (9.6)              | 2095 (8.5)              | 500 (19.5)              | <0.001  |
| <b>COPD, n (%)</b>                                 | 3041 (11.2)             | 2696 (11.0)             | 345 (13.5)              | <0.001  |
| <b>Rheumatoid disease, n (%)</b>                   | 798 (2.9)               | 668 (2.7)               | 130 (5.1)               | <0.001  |
| <b>Peptic ulcer disease, n (%)</b>                 | 542 (2.0)               | 486 (2.0)               | 56 (2.2)                | 0.521   |
| <b>Liverdisease, n (%)</b>                         | 541 (2.0)               | 495 (2.0)               | 46 (1.8)                | 0.496   |
| <b>Diabetes, n (%)</b>                             | 5692 (21.0)             | 4830 (19.7)             | 862 (33.7)              | <0.001  |
| <b>Hemiplegia, Paraplegia, n (%)</b>               | 1232 (4.5)              | 1097 (4.5)              | 135 (5.3)               | 0.07    |
| <b>Renal dysfunction, n (%)</b>                    | 6176 (22.8)             | 5411 (22.1)             | 765 (29.9)              | <0.001  |
| <b>Cancer, n (%)</b>                               | 4625 (17.1)             | 4267 (17.4)             | 358 (14.0)              | <0.001  |
| <b>Delirium, n (%)</b>                             | 1695 (6.3)              | 1332 (5.4)              | 363 (14.2)              | <0.001  |
| <b>Self-care Index, median [IQR]</b>               | 39.00 [34.00, 40.00]    | 39.00 [35.00, 40.00]    | 35.00 [30.00, 39.00]    | <0.001  |
| <b>Braden, median [IQR]</b>                        | 22.00 [20.00, 23.00]    | 22.00 [20.00, 23.00]    | 20.00 [18.00, 22.00]    | <0.001  |
| <b>Nutrition deficiency score, median [IQR]</b>    | 1.00 [1.00, 2.00]       | 1.00 [1.00, 2.00]       | 1.00 [1.00, 2.00]       | <0.001  |
| <b>Catheterisation, n (%)</b>                      | 7873 (29.1)             | 7129 (29.1)             | 744 (29.1)              | 0.995   |
| <b>Surgery during stay, n (%)</b>                  | 8676 (32.0)             | 8158 (33.3)             | 518 (20.3)              | <0.001  |
| <b>GFR [ml/min], median [IQR]</b>                  | 64.00 [45.00, 80.00]    | 64.00 [45.00, 80.50]    | 61.00 [43.00, 79.00]    | 0.002   |
| <b>Creatinine [µmol/l], median [IQR]</b>           | 87.00 [70.00, 115.50]   | 87.00 [70.00, 115.00]   | 88.00 [69.50, 118.00]   | 0.82    |
| <b>Sodium [mmol/l], median [IQR]</b>               | 138.00 [135.00, 140.00] | 138.00 [135.00, 140.00] | 138.00 [135.00, 140.00] | 0.444   |
| <b>Potassium [mmol/l], median [IQR]</b>            | 4.05 [3.80, 4.35]       | 4.05 [3.80, 4.35]       | 4.10 [3.80, 4.40]       | 0.037   |
| <b>ALAT [U/l], median [IQR]</b>                    | 20.00 [14.00, 35.00]    | 20.00 [14.00, 35.00]    | 19.00 [13.00, 35.00]    | 0.005   |
| <b>ASAT [U/l], median [IQR]</b>                    | 25.00 [20.00, 35.00]    | 25.00 [20.00, 35.00]    | 25.00 [19.00, 34.00]    | 0.001   |
| <b>CRP [mg/l], median [IQR]</b>                    | 12.00 [2.70, 56.00]     | 11.20 [2.40, 54.00]     | 20.45 [5.00, 69.50]     | <0.001  |
| <b>CRP [mg/l], n (%)</b>                           |                         |                         |                         | <0.001  |
| < 5                                                | 7884 (29.1)             | 7338 (29.9)             | 546 (21.3)              |         |
| 5-10                                               | 2680 (9.9)              | 2407 (9.8)              | 273 (10.7)              |         |
| 10-50                                              | 6070 (22.4)             | 5345 (21.8)             | 725 (28.3)              |         |
| >50                                                | 6116 (22.6)             | 5384 (21.9)             | 732 (28.6)              |         |
| Missing                                            | 4342 (16.0)             | 4060 (16.5)             | 282 (11.0)              |         |
| <b>Temperature [°C], median [IQR]</b>              | 36.55 [36.25, 36.90]    | 36.55 [36.23, 36.90]    | 36.60 [36.30, 36.95]    | <0.001  |
| <b>Systolic blood pressure [mmHg], mean (±SD)</b>  | 134.14 (19.77)          | 134.26 (19.82)          | 133.00 (19.22)          | 0.002   |
| <b>Diastolic blood pressure [mmHg], mean (±SD)</b> | 71.89 (11.67)           | 72.00 (11.75)           | 70.87 (10.90)           | <0.001  |
| <b>BMI, mean (±SD)</b>                             | 26.10 (5.25)            | 26.05 (5.13)            | 26.56 (6.30)            | <0.001  |
| <b>Polymedication, mean (±SD)</b>                  | 7.58 (3.84)             | 7.19 (3.65)             | 10.91 (3.79)            | <0.001  |
| <b>ACH burden per scale, mean (±SD)</b>            | -                       | 0.35 (0.66)             | 4.08 (1.39)             | <0.001  |

| Supplementary Table S2: Table 1's binary approach  |                         |                         |                         |         |
|----------------------------------------------------|-------------------------|-------------------------|-------------------------|---------|
|                                                    | Overall                 | AAS Low <3              | AAS High ≥3             | p-value |
| <b>n</b>                                           | 27092                   | 24381                   | 2711                    |         |
| <b>Died, n (%)</b>                                 | 913 (3.4)               | 748 (3.1)               | 165 (6.1)               | <0.001  |
| <b>Length of stay, median days [IQR]</b>           | 6.00 [4.00, 10.00]      | 6.00 [4.00, 10.00]      | 8.00 [5.00, 12.00]      | <0.001  |
| <b>Age, mean years (±SD)</b>                       | 78.08 (7.69)            | 77.88 (7.65)            | 79.88 (7.75)            | <0.001  |
| <b>Age, n (%)</b>                                  |                         |                         |                         | <0.001  |
| 65-75 years                                        | 10932 (40.4)            | 10097 (41.4)            | 835 (30.8)              |         |
| 76-85 years                                        | 11012 (40.6)            | 9837 (40.3)             | 1175 (43.3)             |         |
| 86-95 years                                        | 4958 (18.3)             | 4289 (17.6)             | 669 (24.7)              |         |
| >95 years                                          | 190 (0.7)               | 158 (0.6)               | 32 (1.2)                |         |
| <b>Female sex, n (%)</b>                           | 14014 (51.7)            | 12633 (51.8)            | 1381 (50.9)             | 0.399   |
| <b>Departement, n (%)</b>                          |                         |                         |                         |         |
| Medical departement                                | 15119 (55.8)            | 12844 (52.7)            | 2275 (83.9)             | <0.001  |
| Surgical departement                               | 11973 (44.2)            | 11537 (47.3)            | 436 (16.1)              |         |
| <b>Hearing device, n (%)</b>                       |                         |                         |                         | 0.067   |
| None                                               | 15674 (57.9)            | 14157 (58.1)            | 1517 (56.0)             |         |
| Hearing device                                     | 2976 (11.0)             | 2651 (10.9)             | 325 (12.0)              |         |
| Missing                                            | 8442 (31.2)             | 7573 (31.1)             | 869 (32.1)              |         |
| <b>Visual aid, n (%)</b>                           |                         |                         |                         | <0.001  |
| None                                               | 4956 (18.3)             | 4365 (17.9)             | 591 (21.8)              |         |
| Glasses or contacts                                | 13630 (50.3)            | 12385 (50.8)            | 1245 (45.9)             |         |
| Missing                                            | 8506 (31.4)             | 7631 (31.3)             | 875 (32.3)              |         |
| <b>Acute myocardial infarction, n (%)</b>          | 1442 (5.3)              | 1293 (5.3)              | 149 (5.5)               | 0.705   |
| <b>Congestive heart failure, n (%)</b>             | 4751 (17.5)             | 3738 (15.3)             | 1013 (37.4)             | <0.001  |
| <b>Peripheal vascular disease, n (%)</b>           | 3691 (13.6)             | 3265 (13.4)             | 426 (15.7)              | 0.001   |
| <b>Cerebrovascular disease, n (%)</b>              | 3462 (12.8)             | 3157 (12.9)             | 305 (11.3)              | 0.013   |
| <b>Dementia, n (%)</b>                             | 2595 (9.6)              | 2176 (8.9)              | 419 (15.5)              | <0.001  |
| <b>COPD, n (%)</b>                                 | 3041 (11.2)             | 2039 (8.4)              | 1002 (37.0)             | <0.001  |
| <b>Rheumatoid disease, n (%)</b>                   | 798 (2.9)               | 699 (2.9)               | 99 (3.7)                | 0.026   |
| <b>Peptic ulcer disease, n (%)</b>                 | 542 (2.0)               | 497 (2.0)               | 45 (1.7)                | 0.207   |
| <b>Liverdisease, n (%)</b>                         | 541 (2.0)               | 491 (2.0)               | 50 (1.8)                | 0.599   |
| <b>Diabetes, n (%)</b>                             | 5692 (21.0)             | 5015 (20.6)             | 677 (25.0)              | <0.001  |
| <b>Hemiplegia, Paraplegia, n (%)</b>               | 1232 (4.5)              | 1114 (4.6)              | 118 (4.4)               | 0.642   |
| <b>Renal dysfunction, n (%)</b>                    | 6176 (22.8)             | 5264 (21.6)             | 912 (33.6)              | <0.001  |
| <b>Cancer, n (%)</b>                               | 4625 (17.1)             | 4303 (17.6)             | 322 (11.9)              | <0.001  |
| <b>Delirium, n (%)</b>                             | 1695 (6.3)              | 1394 (5.7)              | 301 (11.1)              | <0.001  |
| <b>Self-care Index, median [IQR]</b>               | 39.00 [34.00, 40.00]    | 39.00 [35.00, 40.00]    | 35.00 [30.00, 39.00]    | <0.001  |
| <b>Braden, median [IQR]</b>                        | 22.00 [20.00, 23.00]    | 22.00 [20.00, 23.00]    | 21.00 [18.00, 23.00]    | <0.001  |
| <b>Nutrition deficiency score, median [IQR]</b>    | 1.00 [1.00, 2.00]       | 1.00 [1.00, 2.00]       | 1.00 [1.00, 2.00]       | <0.001  |
| <b>Catheterisation, n (%)</b>                      | 7873 (29.1)             | 7083 (29.1)             | 790 (29.1)              | 0.94    |
| <b>Surgery during stay, n (%)</b>                  | 8676 (32.0)             | 8400 (34.5)             | 276 (10.2)              | <0.001  |
| <b>GFR [ml/min], median [IQR]</b>                  | 64.00 [45.00, 80.00]    | 64.00 [45.50, 80.50]    | 60.00 [41.00, 78.00]    | <0.001  |
| <b>Creatinine [µmol/l], median [IQR]</b>           | 87.00 [70.00, 115.50]   | 87.00 [70.00, 115.00]   | 91.00 [72.00, 123.50]   | <0.001  |
| <b>Sodium [mmol/l], median [IQR]</b>               | 138.00 [135.00, 140.00] | 138.00 [135.00, 140.00] | 138.00 [135.00, 140.00] | 0.198   |
| <b>Potassium [mmol/l], median [IQR]</b>            | 4.05 [3.80, 4.35]       | 4.05 [3.80, 4.35]       | 4.10 [3.75, 4.40]       | 0.252   |
| <b>ALAT [U/l], median [IQR]</b>                    | 20.00 [14.00, 35.00]    | 20.00 [14.00, 35.00]    | 20.00 [13.00, 36.00]    | 0.789   |
| <b>ASAT [U/l], median [IQR]</b>                    | 25.00 [20.00, 35.00]    | 25.00 [20.00, 35.00]    | 26.00 [20.00, 36.00]    | 0.044   |
| <b>CRP [mg/l], median [IQR]</b>                    | 12.00 [2.70, 56.00]     | 10.35 [2.20, 50.60]     | 36.00 [9.00, 93.00]     | <0.001  |
| <b>CRP [mg/l], n (%)</b>                           |                         |                         |                         | <0.001  |
| < 5                                                | 7884 (29.1)             | 7457 (30.6)             | 427 (15.8)              |         |
| 5-10                                               | 2680 (9.9)              | 2433 (10.0)             | 247 (9.1)               |         |
| 10-50                                              | 6070 (22.4)             | 5247 (21.5)             | 823 (30.4)              |         |
| >50                                                | 6116 (22.6)             | 5076 (20.8)             | 1040 (38.4)             |         |
| Missing                                            | 4342 (16.0)             | 4168 (17.1)             | 174 (6.4)               |         |
| <b>Temperature [°C], median [IQR]</b>              | 36.55 [36.25, 36.90]    | 36.55 [36.20, 36.90]    | 36.70 [36.37, 37.12]    | <0.001  |
| <b>Systolic blood pressure [mmHg], mean (±SD)</b>  | 134.14 (19.77)          | 134.60 (19.83)          | 130.18 (18.74)          | <0.001  |
| <b>Diastolic blood pressure [mmHg], mean (±SD)</b> | 71.89 (11.67)           | 72.13 (11.74)           | 69.83 (10.92)           | <0.001  |
| <b>BMI, mean (±SD)</b>                             | 26.10 (5.25)            | 26.08 (5.13)            | 26.28 (6.25)            | 0.13    |
| <b>Polymedication, mean (±SD)</b>                  | 7.58 (3.84)             | 7.22 (3.68)             | 10.38 (3.95)            | <0.001  |
| <b>ACH burden per scale, mean (±SD)</b>            | -                       | 0.14 (0.43)             | 6.16 (3.24)             | <0.001  |

| Supplementary Table S2: Table 1's binary approach  |                         |                         |                         |         |
|----------------------------------------------------|-------------------------|-------------------------|-------------------------|---------|
|                                                    | Overall                 | ARS Low <3              | ARS High ≥3             | p-value |
| <b>n</b>                                           | 27092                   | 25821                   | 1271                    |         |
| <b>Died, n (%)</b>                                 | 913 (3.4)               | 816 (3.2)               | 97 (7.6)                | <0.001  |
| <b>Length of stay, median days [IQR]</b>           | 6.00 [4.00, 10.00]      | 6.00 [4.00, 10.00]      | 7.00 [5.00, 12.00]      | <0.001  |
| <b>Age, mean years (±SD)</b>                       | 78.08 (7.69)            | 77.99 (7.68)            | 79.82 (7.61)            | <0.001  |
| <b>Age, n (%)</b>                                  |                         |                         |                         | <0.001  |
| 65-75 years                                        | 10932 (40.4)            | 10549 (40.9)            | 383 (30.1)              |         |
| 76-85 years                                        | 11012 (40.6)            | 10435 (40.4)            | 577 (45.4)              |         |
| 86-95 years                                        | 4958 (18.3)             | 4663 (18.1)             | 295 (23.2)              |         |
| >95 years                                          | 190 (0.7)               | 174 (0.7)               | 16 (1.3)                |         |
| <b>Female sex, n (%)</b>                           | 14014 (51.7)            | 13312 (51.6)            | 702 (55.2)              | 0.011   |
| <b>Departement, n (%)</b>                          |                         |                         |                         |         |
| Medical departement                                | 15119 (55.8)            | 14249 (55.2)            | 870 (68.5)              | <0.001  |
| Surgical departement                               | 11973 (44.2)            | 11572 (44.8)            | 401 (31.5)              |         |
| <b>Hearing device, n (%)</b>                       |                         |                         |                         | 0.922   |
| None                                               | 15674 (57.9)            | 14932 (57.8)            | 742 (58.4)              |         |
| Hearing device                                     | 2976 (11.0)             | 2837 (11.0)             | 139 (10.9)              |         |
| <i>Missing</i>                                     | <i>8442 (31.2)</i>      | <i>8052 (31.2)</i>      | <i>390 (30.7)</i>       |         |
| <b>Visual aid, n (%)</b>                           |                         |                         |                         | <0.001  |
| None                                               | 4956 (18.3)             | 4659 (18.0)             | 297 (23.4)              |         |
| Glasses or contacts                                | 13630 (50.3)            | 13044 (50.5)            | 586 (46.1)              |         |
| <i>Missing</i>                                     | <i>8506 (31.4)</i>      | <i>8118 (31.4)</i>      | <i>388 (30.5)</i>       |         |
| <b>Acute myocardial infarction, n (%)</b>          | 1442 (5.3)              | 1397 (5.4)              | 45 (3.5)                | 0.005   |
| <b>Congestive heart failure, n (%)</b>             | 4751 (17.5)             | 4521 (17.5)             | 230 (18.1)              | 0.617   |
| <b>Peripheal vascular disease, n (%)</b>           | 3691 (13.6)             | 3521 (13.6)             | 170 (13.4)              | 0.824   |
| <b>Cerebrovascular disease, n (%)</b>              | 3462 (12.8)             | 3285 (12.7)             | 177 (13.9)              | 0.226   |
| <b>Dementia, n (%)</b>                             | 2595 (9.6)              | 2211 (8.6)              | 384 (30.2)              | <0.001  |
| <b>COPD, n (%)</b>                                 | 3041 (11.2)             | 2912 (11.3)             | 129 (10.1)              | 0.231   |
| <b>Rheumatoid disease, n (%)</b>                   | 798 (2.9)               | 768 (3.0)               | 30 (2.4)                | 0.238   |
| <b>Peptic ulcer disease, n (%)</b>                 | 542 (2.0)               | 514 (2.0)               | 28 (2.2)                | 0.671   |
| <b>Liverdisease, n (%)</b>                         | 541 (2.0)               | 522 (2.0)               | 19 (1.5)                | 0.227   |
| <b>Diabetes, n (%)</b>                             | 5692 (21.0)             | 5426 (21.0)             | 266 (20.9)              | 0.97    |
| <b>Hemiplegia, Paraplegia, n (%)</b>               | 1232 (4.5)              | 1140 (4.4)              | 92 (7.2)                | <0.001  |
| <b>Renal dysfunction, n (%)</b>                    | 6176 (22.8)             | 5841 (22.6)             | 335 (26.4)              | 0.002   |
| <b>Cancer, n (%)</b>                               | 4625 (17.1)             | 4387 (17.0)             | 238 (18.7)              | 0.117   |
| <b>Delirium, n (%)</b>                             | 1695 (6.3)              | 1405 (5.4)              | 290 (22.8)              | <0.001  |
| <b>Self-care Index, median [IQR]</b>               | 39.00 [34.00, 40.00]    | 39.00 [35.00, 40.00]    | 33.00 [25.00, 39.00]    | <0.001  |
| <b>Braden, median [IQR]</b>                        | 22.00 [20.00, 23.00]    | 22.00 [20.00, 23.00]    | 19.00 [17.00, 22.00]    | <0.001  |
| <b>Nutrition deficiency score, median [IQR]</b>    | 1.00 [1.00, 2.00]       | 1.00 [1.00, 2.00]       | 1.00 [1.00, 3.00]       | <0.001  |
| <b>Catheterisation, n (%)</b>                      | 7873 (29.1)             | 7461 (28.9)             | 412 (32.4)              | 0.008   |
| <b>Surgery during stay, n (%)</b>                  | 8676 (32.0)             | 8441 (32.7)             | 235 (18.5)              | <0.001  |
| <b>GFR [ml/min], median [IQR]</b>                  | 64.00 [45.00, 80.00]    | 64.00 [45.00, 80.00]    | 63.00 [44.00, 80.50]    | 0.808   |
| <b>Creatinine [µmol/l], median [IQR]</b>           | 87.00 [70.00, 115.50]   | 87.00 [70.00, 115.50]   | 85.50 [67.00, 115.00]   | 0.061   |
| <b>Sodium [mmol/l], median [IQR]</b>               | 138.00 [135.00, 140.00] | 138.00 [135.00, 140.00] | 138.00 [135.00, 140.00] | 0.849   |
| <b>Potassium [mmol/l], median [IQR]</b>            | 4.05 [3.80, 4.35]       | 4.05 [3.80, 4.35]       | 4.05 [3.70, 4.39]       | 0.486   |
| <b>ALAT [U/l], median [IQR]</b>                    | 20.00 [14.00, 35.00]    | 20.00 [14.00, 36.00]    | 18.00 [12.00, 30.88]    | <0.001  |
| <b>ASAT [U/l], median [IQR]</b>                    | 25.00 [20.00, 35.00]    | 25.00 [20.00, 35.00]    | 25.00 [20.00, 34.00]    | 0.07    |
| <b>CRP [mg/l], median [IQR]</b>                    | 12.00 [2.70, 56.00]     | 12.00 [2.60, 55.50]     | 18.00 [4.00, 65.19]     | <0.001  |
| <b>CRP [mg/l], n (%)</b>                           |                         |                         |                         | <0.001  |
| < 5                                                | 7884 (29.1)             | 7580 (29.4)             | 304 (23.9)              |         |
| 5-10                                               | 2680 (9.9)              | 2561 (9.9)              | 119 (9.4)               |         |
| 10-50                                              | 6070 (22.4)             | 5747 (22.3)             | 323 (25.4)              |         |
| >50                                                | 6116 (22.6)             | 5790 (22.4)             | 326 (25.6)              |         |
| <i>Missing</i>                                     | <i>4342 (16.0)</i>      | <i>4143 (16.0)</i>      | <i>199 (15.7)</i>       |         |
| <b>Temperature [°C], median [IQR]</b>              | 36.55 [36.25, 36.90]    | 36.55 [36.23, 36.90]    | 36.60 [36.30, 37.00]    | <0.001  |
| <b>Systolic blood pressure [mmHg], mean (±SD)</b>  | 134.14 (19.77)          | 134.29 (19.75)          | 131.24 (19.91)          | <0.001  |
| <b>Diastolic blood pressure [mmHg], mean (±SD)</b> | 71.89 (11.67)           | 71.98 (11.68)           | 70.20 (11.41)           | <0.001  |
| <b>BMI, mean (±SD)</b>                             | 26.10 (5.25)            | 26.14 (5.24)            | 25.15 (5.44)            | <0.001  |
| <b>Polymedication, mean (±SD)</b>                  | 7.58 (3.84)             | 7.41 (3.78)             | 10.53 (3.81)            | <0.001  |
| <b>ACH burden per scale, mean (±SD)</b>            | -                       | 0.19 (0.48)             | 4.24 (1.84)             | <0.001  |



| Supplementary Table S2: Table 1's binary approach  |                         |                         |                         |         |
|----------------------------------------------------|-------------------------|-------------------------|-------------------------|---------|
|                                                    | Overall                 | ACL Low <3              | ACL High ≥3             | p-value |
| <b>n</b>                                           | 27092                   | 24979                   | 2113                    |         |
| <b>Died, n (%)</b>                                 | 913 (3.4)               | 794 (3.2)               | 119 (5.6)               | <0.001  |
| <b>Length of stay, median days [IQR]</b>           | 6.00 [4.00, 10.00]      | 6.00 [4.00, 10.00]      | 8.00 [5.00, 12.00]      | <0.001  |
| <b>Age, mean years (±SD)</b>                       | 78.08 (7.69)            | 78.02 (7.68)            | 78.71 (7.70)            | <0.001  |
| <b>Age, n (%)</b>                                  |                         |                         |                         | <0.001  |
| 65-75 years                                        | 10932 (40.4)            | 10177 (40.7)            | 755 (35.7)              |         |
| 76-85 years                                        | 11012 (40.6)            | 10106 (40.5)            | 906 (42.9)              |         |
| 86-95 years                                        | 4958 (18.3)             | 4522 (18.1)             | 436 (20.6)              |         |
| >95 years                                          | 190 (0.7)               | 174 (0.7)               | 16 (0.8)                |         |
| <b>Female sex, n (%)</b>                           | 14014 (51.7)            | 12691 (50.8)            | 1323 (62.6)             | <0.001  |
| <b>Departement, n (%)</b>                          |                         |                         |                         |         |
| Medical departement                                | 15119 (55.8)            | 13897 (55.6)            | 1222 (57.8)             | 0.054   |
| Surgical departement                               | 11973 (44.2)            | 11082 (44.4)            | 891 (42.2)              |         |
| <b>Hearing device, n (%)</b>                       |                         |                         |                         | <0.001  |
| None                                               | 15674 (57.9)            | 14360 (57.5)            | 1314 (62.2)             |         |
| Hearing device                                     | 2976 (11.0)             | 2733 (10.9)             | 243 (11.5)              |         |
| Missing                                            | 8442 (31.2)             | 7886 (31.6)             | 556 (26.3)              |         |
| <b>Visual aid, n (%)</b>                           |                         |                         |                         | <0.001  |
| None                                               | 4956 (18.3)             | 4526 (18.1)             | 430 (20.4)              |         |
| Glasses or contacts                                | 13630 (50.3)            | 12512 (50.1)            | 1118 (52.9)             |         |
| Missing                                            | 8506 (31.4)             | 7941 (31.8)             | 565 (26.7)              |         |
| <b>Acute myocardial infarction, n (%)</b>          | 1442 (5.3)              | 1351 (5.4)              | 91 (4.3)                | 0.034   |
| <b>Congestive heart failure, n (%)</b>             | 4751 (17.5)             | 4385 (17.6)             | 366 (17.3)              | 0.809   |
| <b>Peripheal vascular disease, n (%)</b>           | 3691 (13.6)             | 3365 (13.5)             | 326 (15.4)              | 0.013   |
| <b>Cerebrovascular disease, n (%)</b>              | 3462 (12.8)             | 3242 (13.0)             | 220 (10.4)              | 0.001   |
| <b>Dementia, n (%)</b>                             | 2595 (9.6)              | 2270 (9.1)              | 325 (15.4)              | <0.001  |
| <b>COPD, n (%)</b>                                 | 3041 (11.2)             | 2783 (11.1)             | 258 (12.2)              | 0.145   |
| <b>Rheumatoid disease, n (%)</b>                   | 798 (2.9)               | 694 (2.8)               | 104 (4.9)               | <0.001  |
| <b>Peptic ulcer disease, n (%)</b>                 | 542 (2.0)               | 498 (2.0)               | 44 (2.1)                | 0.843   |
| <b>Liverdisease, n (%)</b>                         | 541 (2.0)               | 508 (2.0)               | 33 (1.6)                | 0.159   |
| <b>Diabetes, n (%)</b>                             | 5692 (21.0)             | 5064 (20.3)             | 628 (29.7)              | <0.001  |
| <b>Hemiplegia, Paraplegia, n (%)</b>               | 1232 (4.5)              | 1128 (4.5)              | 104 (4.9)               | 0.42    |
| <b>Renal dysfunction, n (%)</b>                    | 6176 (22.8)             | 5693 (22.8)             | 483 (22.9)              | 0.965   |
| <b>Cancer, n (%)</b>                               | 4625 (17.1)             | 4194 (16.8)             | 431 (20.4)              | <0.001  |
| <b>Delirium, n (%)</b>                             | 1695 (6.3)              | 1459 (5.8)              | 236 (11.2)              | <0.001  |
| <b>Self-care Index, median [IQR]</b>               | 39.00 [34.00, 40.00]    | 39.00 [35.00, 40.00]    | 35.00 [30.00, 39.00]    | <0.001  |
| <b>Braden, median [IQR]</b>                        | 22.00 [20.00, 23.00]    | 22.00 [20.00, 23.00]    | 20.00 [18.00, 22.00]    | <0.001  |
| <b>Nutrition deficiency score, median [IQR]</b>    | 1.00 [1.00, 2.00]       | 1.00 [1.00, 2.00]       | 1.00 [1.00, 3.00]       | <0.001  |
| <b>Catheterisation, n (%)</b>                      | 7873 (29.1)             | 7379 (29.5)             | 494 (23.4)              | <0.001  |
| <b>Surgery during stay, n (%)</b>                  | 8676 (32.0)             | 8191 (32.8)             | 485 (23.0)              | <0.001  |
| <b>GFR [ml/min], median [IQR]</b>                  | 64.00 [45.00, 80.00]    | 63.50 [45.00, 80.00]    | 65.00 [47.00, 81.50]    | <0.001  |
| <b>Creatinine [µmol/l], median [IQR]</b>           | 87.00 [70.00, 115.50]   | 87.50 [70.50, 116.00]   | 82.50 [65.00, 108.25]   | <0.001  |
| <b>Sodium [mmol/l], median [IQR]</b>               | 138.00 [135.00, 140.00] | 138.00 [135.00, 140.00] | 137.00 [134.00, 140.00] | <0.001  |
| <b>Potassium [mmol/l], median [IQR]</b>            | 4.05 [3.80, 4.35]       | 4.05 [3.80, 4.35]       | 4.05 [3.70, 4.35]       | 0.333   |
| <b>ALAT [U/l], median [IQR]</b>                    | 20.00 [14.00, 35.00]    | 20.00 [14.00, 36.00]    | 19.00 [12.00, 32.75]    | 0.011   |
| <b>ASAT [U/l], median [IQR]</b>                    | 25.00 [20.00, 35.00]    | 25.00 [20.00, 35.00]    | 25.00 [20.00, 34.00]    | 0.046   |
| <b>CRP [mg/l], median [IQR]</b>                    | 12.00 [2.70, 56.00]     | 12.00 [2.50, 55.50]     | 15.75 [3.64, 59.02]     | <0.001  |
| <b>CRP [mg/l], n (%)</b>                           |                         |                         |                         | <0.001  |
| < 5                                                | 7884 (29.1)             | 7321 (29.3)             | 563 (26.6)              |         |
| 5-10                                               | 2680 (9.9)              | 2442 (9.8)              | 238 (11.3)              |         |
| 10-50                                              | 6070 (22.4)             | 5487 (22.0)             | 583 (27.6)              |         |
| >50                                                | 6116 (22.6)             | 5564 (22.3)             | 552 (26.1)              |         |
| Missing                                            | 4342 (16.0)             | 4165 (16.7)             | 177 (8.4)               |         |
| <b>Temperature [°C], median [IQR]</b>              | 36.55 [36.25, 36.90]    | 36.55 [36.23, 36.90]    | 36.60 [36.30, 36.90]    | 0.003   |
| <b>Systolic blood pressure [mmHg], mean (±SD)</b>  | 134.14 (19.77)          | 134.04 (19.78)          | 135.15 (19.64)          | 0.014   |
| <b>Diastolic blood pressure [mmHg], mean (±SD)</b> | 71.89 (11.67)           | 71.95 (11.73)           | 71.27 (11.02)           | 0.01    |
| <b>BMI, mean (±SD)</b>                             | 26.10 (5.25)            | 26.10 (5.18)            | 26.02 (6.11)            | 0.571   |
| <b>Polymedication, mean (±SD)</b>                  | 7.58 (3.84)             | 7.24 (3.67)             | 11.13 (3.81)            | <0.001  |
| <b>ACH burden per scale, mean (±SD)</b>            | -                       | 0.31 (0.62)             | 4.42 (1.85)             | <0.001  |

| Supplementary Table S2: Table 1's binary approach  |                         |                         |                         |         |
|----------------------------------------------------|-------------------------|-------------------------|-------------------------|---------|
|                                                    | Overall                 | CrAS Low <3             | CrAS High ≥3            | p-value |
| <b>n</b>                                           | 27092                   | 23319                   | 3773                    |         |
| <b>Died, n (%)</b>                                 | 913 (3.4)               | 675 (2.9)               | 238 (6.3)               | <0.001  |
| <b>Length of stay, median days [IQR]</b>           | 6.00 [4.00, 10.00]      | 6.00 [4.00, 10.00]      | 7.00 [5.00, 12.00]      | <0.001  |
| <b>Age, mean years (±SD)</b>                       | 78.08 (7.69)            | 77.89 (7.64)            | 79.22 (7.88)            | <0.001  |
| <b>Age, n (%)</b>                                  |                         |                         |                         | <0.001  |
| 65-75 years                                        | 10932 (40.4)            | 9636 (41.3)             | 1296 (34.3)             |         |
| 76-85 years                                        | 11012 (40.6)            | 9450 (40.5)             | 1562 (41.4)             |         |
| 86-95 years                                        | 4958 (18.3)             | 4076 (17.5)             | 882 (23.4)              |         |
| >95 years                                          | 190 (0.7)               | 157 (0.7)               | 33 (0.9)                |         |
| <b>Female sex, n (%)</b>                           | 14014 (51.7)            | 11814 (50.7)            | 2200 (58.3)             | <0.001  |
| <b>Departement, n (%)</b>                          |                         |                         |                         |         |
| Medical departement                                | 15119 (55.8)            | 13037 (55.9)            | 2082 (55.2)             | 0.415   |
| Surgical departement                               | 11973 (44.2)            | 10282 (44.1)            | 1691 (44.8)             |         |
| <b>Hearing device, n (%)</b>                       |                         |                         |                         | <0.001  |
| None                                               | 15674 (57.9)            | 13371 (57.3)            | 2303 (61.0)             |         |
| Hearing device                                     | 2976 (11.0)             | 2558 (11.0)             | 418 (11.1)              |         |
| <i>Missing</i>                                     | <i>8442 (31.2)</i>      | <i>7390 (31.7)</i>      | <i>1052 (27.9)</i>      |         |
| <b>Visual aid, n (%)</b>                           |                         |                         |                         | <0.001  |
| None                                               | 4956 (18.3)             | 4158 (17.8)             | 798 (21.2)              |         |
| Glasses or contacts                                | 13630 (50.3)            | 11717 (50.2)            | 1913 (50.7)             |         |
| <i>Missing</i>                                     | <i>8506 (31.4)</i>      | <i>7444 (31.9)</i>      | <i>1062 (28.1)</i>      |         |
| <b>Acute myocardial infarction, n (%)</b>          | 1442 (5.3)              | 1277 (5.5)              | 165 (4.4)               | 0.006   |
| <b>Congestive heart failure, n (%)</b>             | 4751 (17.5)             | 4044 (17.3)             | 707 (18.7)              | 0.039   |
| <b>Peripheal vascular disease, n (%)</b>           | 3691 (13.6)             | 3154 (13.5)             | 537 (14.2)              | 0.25    |
| <b>Cerebrovascular disease, n (%)</b>              | 3462 (12.8)             | 3034 (13.0)             | 428 (11.3)              | 0.005   |
| <b>Dementia, n (%)</b>                             | 2595 (9.6)              | 1843 (7.9)              | 752 (19.9)              | <0.001  |
| <b>COPD, n (%)</b>                                 | 3041 (11.2)             | 2616 (11.2)             | 425 (11.3)              | 0.956   |
| <b>Rheumatoid disease, n (%)</b>                   | 798 (2.9)               | 656 (2.8)               | 142 (3.8)               | 0.002   |
| <b>Peptic ulcer disease, n (%)</b>                 | 542 (2.0)               | 466 (2.0)               | 76 (2.0)                | 0.998   |
| <b>Liverdisease, n (%)</b>                         | 541 (2.0)               | 479 (2.1)               | 62 (1.6)                | 0.107   |
| <b>Diabetes, n (%)</b>                             | 5692 (21.0)             | 4872 (20.9)             | 820 (21.7)              | 0.248   |
| <b>Hemiplegia, Paraplegia, n (%)</b>               | 1232 (4.5)              | 1043 (4.5)              | 189 (5.0)               | 0.154   |
| <b>Renal dysfunction, n (%)</b>                    | 6176 (22.8)             | 5282 (22.7)             | 894 (23.7)              | 0.162   |
| <b>Cancer, n (%)</b>                               | 4625 (17.1)             | 3990 (17.1)             | 635 (16.8)              | 0.688   |
| <b>Delirium, n (%)</b>                             | 1695 (6.3)              | 1154 (4.9)              | 541 (14.3)              | <0.001  |
| <b>Self-care Index, median [IQR]</b>               | 39.00 [34.00, 40.00]    | 39.00 [35.00, 40.00]    | 36.00 [30.00, 39.00]    | <0.001  |
| <b>Braden, median [IQR]</b>                        | 22.00 [20.00, 23.00]    | 22.00 [20.00, 23.00]    | 21.00 [18.00, 23.00]    | <0.001  |
| <b>Nutrition deficiency score, median [IQR]</b>    | 1.00 [1.00, 2.00]       | 1.00 [1.00, 2.00]       | 1.00 [1.00, 2.00]       | <0.001  |
| <b>Catheterisation, n (%)</b>                      | 7873 (29.1)             | 6727 (28.8)             | 1146 (30.4)             | 0.058   |
| <b>Surgery during stay, n (%)</b>                  | 8676 (32.0)             | 7540 (32.3)             | 1136 (30.1)             | 0.007   |
| <b>GFR [ml/min], median [IQR]</b>                  | 64.00 [45.00, 80.00]    | 64.00 [45.00, 80.00]    | 64.00 [45.00, 81.00]    | 0.059   |
| <b>Creatinine [µmol/l], median [IQR]</b>           | 87.00 [70.00, 115.50]   | 87.50 [71.00, 116.00]   | 84.00 [66.50, 113.00]   | <0.001  |
| <b>Sodium [mmol/l], median [IQR]</b>               | 138.00 [135.00, 140.00] | 138.00 [135.00, 140.00] | 138.00 [135.00, 140.00] | 0.001   |
| <b>Potassium [mmol/l], median [IQR]</b>            | 4.05 [3.80, 4.35]       | 4.05 [3.80, 4.35]       | 4.10 [3.80, 4.40]       | 0.205   |
| <b>ALAT [U/l], median [IQR]</b>                    | 20.00 [14.00, 35.00]    | 20.00 [14.00, 35.00]    | 20.00 [13.00, 36.00]    | 0.178   |
| <b>ASAT [U/l], median [IQR]</b>                    | 25.00 [20.00, 35.00]    | 25.00 [20.00, 35.00]    | 25.00 [20.00, 34.00]    | 0.186   |
| <b>CRP [mg/l], median [IQR]</b>                    | 12.00 [2.70, 56.00]     | 11.10 [2.40, 54.90]     | 18.00 [4.00, 61.00]     | <0.001  |
| <b>CRP [mg/l], n (%)</b>                           |                         |                         |                         | <0.001  |
| < 5                                                | 7884 (29.1)             | 7028 (30.1)             | 856 (22.7)              |         |
| 5-10                                               | 2680 (9.9)              | 2296 (9.8)              | 384 (10.2)              |         |
| 10-50                                              | 6070 (22.4)             | 5085 (21.8)             | 985 (26.1)              |         |
| >50                                                | 6116 (22.6)             | 5194 (22.3)             | 922 (24.4)              |         |
| <i>Missing</i>                                     | <i>4342 (16.0)</i>      | <i>3716 (15.9)</i>      | <i>626 (16.6)</i>       |         |
| <b>Temperature [°C], median [IQR]</b>              | 36.55 [36.25, 36.90]    | 36.55 [36.23, 36.90]    | 36.60 [36.30, 36.90]    | <0.001  |
| <b>Systolic blood pressure [mmHg], mean (±SD)</b>  | 134.14 (19.77)          | 134.27 (19.79)          | 133.37 (19.59)          | 0.011   |
| <b>Diastolic blood pressure [mmHg], mean (±SD)</b> | 71.89 (11.67)           | 72.08 (11.75)           | 70.79 (11.13)           | <0.001  |
| <b>BMI, mean (±SD)</b>                             | 26.10 (5.25)            | 26.15 (5.19)            | 25.74 (5.65)            | <0.001  |
| <b>Polymedication, mean (±SD)</b>                  | 7.58 (3.84)             | 7.08 (3.63)             | 10.30 (3.80)            | <0.001  |
| <b>ACH burden per scale, mean (±SD)</b>            | -                       | 0.42 (0.71)             | 5.03 (2.58)             | <0.001  |

| Supplementary Table S2: Table 1's binary approach  |                         |                         |                         |         |
|----------------------------------------------------|-------------------------|-------------------------|-------------------------|---------|
|                                                    | Overall                 | ADS Low <3              | ADS High ≥3             | p-value |
| <b>n</b>                                           | 27092                   | 23919                   | 3173                    |         |
| <b>Died, n (%)</b>                                 | 913 (3.4)               | 691 (2.9)               | 222 (7.0)               | <0.001  |
| <b>Length of stay, median days [IQR]</b>           | 6.00 [4.00, 10.00]      | 6.00 [4.00, 10.00]      | 8.00 [5.00, 12.00]      | <0.001  |
| <b>Age, mean years (±SD)</b>                       | 78.08 (7.69)            | 78.09 (7.69)            | 77.98 (7.69)            | 0.443   |
| <b>Age, n (%)</b>                                  |                         |                         |                         | 0.694   |
| 65-75 years                                        | 10932 (40.4)            | 9633 (40.3)             | 1299 (40.9)             |         |
| 76-85 years                                        | 11012 (40.6)            | 9738 (40.7)             | 1274 (40.2)             |         |
| 86-95 years                                        | 4958 (18.3)             | 4376 (18.3)             | 582 (18.3)              |         |
| >95 years                                          | 190 (0.7)               | 172 (0.7)               | 18 (0.6)                |         |
| <b>Female sex, n (%)</b>                           | 14014 (51.7)            | 12152 (50.8)            | 1862 (58.7)             | <0.001  |
| <b>Departement, n (%)</b>                          |                         |                         |                         |         |
| Medical departement                                | 15119 (55.8)            | 13263 (55.4)            | 1856 (58.5)             | 0.001   |
| Surgical departement                               | 11973 (44.2)            | 10656 (44.6)            | 1317 (41.5)             |         |
| <b>Hearing device, n (%)</b>                       |                         |                         |                         | <0.001  |
| None                                               | 15674 (57.9)            | 13665 (57.1)            | 2009 (63.3)             |         |
| Hearing device                                     | 2976 (11.0)             | 2622 (11.0)             | 354 (11.2)              |         |
| Missing                                            | 8442 (31.2)             | 7632 (31.9)             | 810 (25.5)              |         |
| <b>Visual aid, n (%)</b>                           |                         |                         |                         | <0.001  |
| None                                               | 4956 (18.3)             | 4315 (18.0)             | 641 (20.2)              |         |
| Glasses or contacts                                | 13630 (50.3)            | 11916 (49.8)            | 1714 (54.0)             |         |
| Missing                                            | 8506 (31.4)             | 7688 (32.1)             | 818 (25.8)              |         |
| <b>Acute myocardial infarction, n (%)</b>          | 1442 (5.3)              | 1317 (5.5)              | 125 (3.9)               | <0.001  |
| <b>Congestive heart failure, n (%)</b>             | 4751 (17.5)             | 3986 (16.7)             | 765 (24.1)              | <0.001  |
| <b>Peripheal vascular disease, n (%)</b>           | 3691 (13.6)             | 3177 (13.3)             | 514 (16.2)              | <0.001  |
| <b>Cerebrovascular disease, n (%)</b>              | 3462 (12.8)             | 3157 (13.2)             | 305 (9.6)               | <0.001  |
| <b>Dementia, n (%)</b>                             | 2595 (9.6)              | 2286 (9.6)              | 309 (9.7)               | 0.769   |
| <b>COPD, n (%)</b>                                 | 3041 (11.2)             | 2472 (10.3)             | 569 (17.9)              | <0.001  |
| <b>Rheumatoid disease, n (%)</b>                   | 798 (2.9)               | 620 (2.6)               | 178 (5.6)               | <0.001  |
| <b>Peptic ulcer disease, n (%)</b>                 | 542 (2.0)               | 482 (2.0)               | 60 (1.9)                | 0.688   |
| <b>Liverdisease, n (%)</b>                         | 541 (2.0)               | 463 (1.9)               | 78 (2.5)                | 0.056   |
| <b>Diabetes, n (%)</b>                             | 5692 (21.0)             | 4979 (20.8)             | 713 (22.5)              | 0.033   |
| <b>Hemiplegia, Paraplegia, n (%)</b>               | 1232 (4.5)              | 1097 (4.6)              | 135 (4.3)               | 0.425   |
| <b>Renal dysfunction, n (%)</b>                    | 6176 (22.8)             | 5323 (22.3)             | 853 (26.9)              | <0.001  |
| <b>Cancer, n (%)</b>                               | 4625 (17.1)             | 4007 (16.8)             | 618 (19.5)              | <0.001  |
| <b>Delirium, n (%)</b>                             | 1695 (6.3)              | 1461 (6.1)              | 234 (7.4)               | 0.006   |
| <b>Self-care Index, median [IQR]</b>               | 39.00 [34.00, 40.00]    | 39.00 [35.00, 40.00]    | 36.00 [31.25, 40.00]    | <0.001  |
| <b>Braden, median [IQR]</b>                        | 22.00 [20.00, 23.00]    | 22.00 [20.00, 23.00]    | 21.00 [18.00, 23.00]    | <0.001  |
| <b>Nutrition deficiency score, median [IQR]</b>    | 1.00 [1.00, 2.00]       | 1.00 [1.00, 2.00]       | 1.00 [1.00, 2.00]       | <0.001  |
| <b>Catheterisation, n (%)</b>                      | 7873 (29.1)             | 6946 (29.0)             | 927 (29.2)              | 0.854   |
| <b>Surgery during stay, n (%)</b>                  | 8676 (32.0)             | 7812 (32.7)             | 864 (27.2)              | <0.001  |
| <b>GFR [ml/min], median [IQR]</b>                  | 64.00 [45.00, 80.00]    | 64.00 [45.00, 80.00]    | 63.00 [44.00, 81.50]    | 0.596   |
| <b>Creatinine [µmol/l], median [IQR]</b>           | 87.00 [70.00, 115.50]   | 87.00 [70.00, 115.50]   | 86.00 [68.00, 116.00]   | 0.005   |
| <b>Sodium [mmol/l], median [IQR]</b>               | 138.00 [135.00, 140.00] | 138.00 [135.00, 140.00] | 138.00 [135.00, 140.00] | 0.009   |
| <b>Potassium [mmol/l], median [IQR]</b>            | 4.05 [3.80, 4.35]       | 4.05 [3.80, 4.35]       | 4.05 [3.75, 4.40]       | 0.819   |
| <b>ALAT [U/l], median [IQR]</b>                    | 20.00 [14.00, 35.00]    | 20.00 [14.00, 35.00]    | 20.00 [13.75, 35.00]    | 0.712   |
| <b>ASAT [U/l], median [IQR]</b>                    | 25.00 [20.00, 35.00]    | 25.00 [20.00, 35.00]    | 25.00 [20.00, 35.00]    | 0.978   |
| <b>CRP [mg/l], median [IQR]</b>                    | 12.00 [2.70, 56.00]     | 11.10 [2.40, 53.50]     | 19.80 [4.60, 69.00]     | <0.001  |
| <b>CRP [mg/l], n (%)</b>                           |                         |                         |                         | <0.001  |
| < 5                                                | 7884 (29.1)             | 7188 (30.1)             | 696 (21.9)              |         |
| 5-10                                               | 2680 (9.9)              | 2335 (9.8)              | 345 (10.9)              |         |
| 10-50                                              | 6070 (22.4)             | 5243 (21.9)             | 827 (26.1)              |         |
| >50                                                | 6116 (22.6)             | 5229 (21.9)             | 887 (28.0)              |         |
| Missing                                            | 4342 (16.0)             | 3924 (16.4)             | 418 (13.2)              |         |
| <b>Temperature [°C], median [IQR]</b>              | 36.55 [36.25, 36.90]    | 36.55 [36.23, 36.90]    | 36.60 [36.30, 36.92]    | <0.001  |
| <b>Systolic blood pressure [mmHg], mean (±SD)</b>  | 134.14 (19.77)          | 134.30 (19.77)          | 132.97 (19.67)          | <0.001  |
| <b>Diastolic blood pressure [mmHg], mean (±SD)</b> | 71.89 (11.67)           | 72.04 (11.77)           | 70.85 (10.94)           | <0.001  |
| <b>BMI, mean (±SD)</b>                             | 26.10 (5.25)            | 26.09 (5.17)            | 26.14 (5.85)            | 0.684   |
| <b>Polymedication, mean (±SD)</b>                  | 7.58 (3.84)             | 7.11 (3.62)             | 10.70 (3.83)            | <0.001  |
| <b>ACH burden per scale, mean (±SD)</b>            | -                       | 0.43 (0.68)             | 4.24 (1.87)             | <0.001  |

| Supplementary Table S2: Table 1's binary approach  |                         |                         |                         |         |
|----------------------------------------------------|-------------------------|-------------------------|-------------------------|---------|
|                                                    | Overall                 | SCDL Low <3             | SCDL High ≥3            | p-value |
| <b>n</b>                                           | 27092                   | 23790                   | 3302                    |         |
| <b>Died, n (%)</b>                                 | 913 (3.4)               | 677 (2.8)               | 236 (7.1)               | <0.001  |
| <b>Length of stay, median days [IQR]</b>           | 6.00 [4.00, 10.00]      | 6.00 [4.00, 10.00]      | 7.00 [4.00, 11.00]      | <0.001  |
| <b>Age, mean years (±SD)</b>                       | 78.08 (7.69)            | 78.18 (7.67)            | 77.33 (7.77)            | <0.001  |
| <b>Age, n (%)</b>                                  |                         |                         |                         | <0.001  |
| 65-75 years                                        | 10932 (40.4)            | 9473 (39.8)             | 1459 (44.2)             |         |
| 76-85 years                                        | 11012 (40.6)            | 9725 (40.9)             | 1287 (39.0)             |         |
| 86-95 years                                        | 4958 (18.3)             | 4427 (18.6)             | 531 (16.1)              |         |
| >95 years                                          | 190 (0.7)               | 165 (0.7)               | 25 (0.8)                |         |
| <b>Female sex, n (%)</b>                           | 14014 (51.7)            | 12150 (51.1)            | 1864 (56.5)             | <0.001  |
| <b>Departement, n (%)</b>                          |                         |                         |                         |         |
| Medical departement                                | 15119 (55.8)            | 13588 (57.1)            | 1531 (46.4)             | <0.001  |
| Surgical departement                               | 11973 (44.2)            | 10202 (42.9)            | 1771 (53.6)             |         |
| <b>Hearing device, n (%)</b>                       |                         |                         |                         | <0.001  |
| None                                               | 15674 (57.9)            | 13573 (57.1)            | 2101 (63.6)             |         |
| Hearing device                                     | 2976 (11.0)             | 2621 (11.0)             | 355 (10.8)              |         |
| Missing                                            | 8442 (31.2)             | 7596 (31.9)             | 846 (25.6)              |         |
| <b>Visual aid, n (%)</b>                           |                         |                         |                         | <0.001  |
| None                                               | 4956 (18.3)             | 4279 (18.0)             | 677 (20.5)              |         |
| Glasses or contacts                                | 13630 (50.3)            | 11856 (49.8)            | 1774 (53.7)             |         |
| Missing                                            | 8506 (31.4)             | 7655 (32.2)             | 851 (25.8)              |         |
| <b>Acute myocardial infarction, n (%)</b>          | 1442 (5.3)              | 1289 (5.4)              | 153 (4.6)               | 0.066   |
| <b>Congestive heart failure, n (%)</b>             | 4751 (17.5)             | 4256 (17.9)             | 495 (15.0)              | <0.001  |
| <b>Peripheal vascular disease, n (%)</b>           | 3691 (13.6)             | 3203 (13.5)             | 488 (14.8)              | 0.042   |
| <b>Cerebrovascular disease, n (%)</b>              | 3462 (12.8)             | 3178 (13.4)             | 284 (8.6)               | <0.001  |
| <b>Dementia, n (%)</b>                             | 2595 (9.6)              | 2351 (9.9)              | 244 (7.4)               | <0.001  |
| <b>COPD, n (%)</b>                                 | 3041 (11.2)             | 2551 (10.7)             | 490 (14.8)              | <0.001  |
| <b>Rheumatoid disease, n (%)</b>                   | 798 (2.9)               | 592 (2.5)               | 206 (6.2)               | <0.001  |
| <b>Peptic ulcer disease, n (%)</b>                 | 542 (2.0)               | 494 (2.1)               | 48 (1.5)                | 0.02    |
| <b>Liverdisease, n (%)</b>                         | 541 (2.0)               | 504 (2.1)               | 37 (1.1)                | <0.001  |
| <b>Diabetes, n (%)</b>                             | 5692 (21.0)             | 5002 (21.0)             | 690 (20.9)              | 0.882   |
| <b>Hemiplegia, Paraplegia, n (%)</b>               | 1232 (4.5)              | 1115 (4.7)              | 117 (3.5)               | 0.004   |
| <b>Renal dysfunction, n (%)</b>                    | 6176 (22.8)             | 5546 (23.3)             | 630 (19.1)              | <0.001  |
| <b>Cancer, n (%)</b>                               | 4625 (17.1)             | 3987 (16.8)             | 638 (19.3)              | <0.001  |
| <b>Delirium, n (%)</b>                             | 1695 (6.3)              | 1553 (6.5)              | 142 (4.3)               | <0.001  |
| <b>Self-care Index, median [IQR]</b>               | 39.00 [34.00, 40.00]    | 39.00 [34.00, 40.00]    | 38.00 [33.00, 40.00]    | <0.001  |
| <b>Braden, median [IQR]</b>                        | 22.00 [20.00, 23.00]    | 22.00 [20.00, 23.00]    | 22.00 [19.00, 23.00]    | <0.001  |
| <b>Nutrition deficiency score, median [IQR]</b>    | 1.00 [1.00, 2.00]       | 1.00 [1.00, 2.00]       | 1.00 [1.00, 2.00]       | 0.157   |
| <b>Catheterisation, n (%)</b>                      | 7873 (29.1)             | 6833 (28.7)             | 1040 (31.5)             | 0.001   |
| <b>Surgery during stay, n (%)</b>                  | 8676 (32.0)             | 7323 (30.8)             | 1353 (41.0)             | <0.001  |
| <b>GFR [ml/min], median [IQR]</b>                  | 64.00 [45.00, 80.00]    | 63.00 [44.67, 80.00]    | 67.00 [48.00, 84.00]    | <0.001  |
| <b>Creatinine [µmol/l], median [IQR]</b>           | 87.00 [70.00, 115.50]   | 88.00 [71.00, 116.00]   | 82.00 [66.00, 109.00]   | <0.001  |
| <b>Sodium [mmol/l], median [IQR]</b>               | 138.00 [135.00, 140.00] | 138.00 [135.00, 140.00] | 138.00 [135.00, 140.00] | 0.014   |
| <b>Potassium [mmol/l], median [IQR]</b>            | 4.05 [3.80, 4.35]       | 4.05 [3.80, 4.35]       | 4.10 [3.80, 4.40]       | 0.215   |
| <b>ALAT [U/l], median [IQR]</b>                    | 20.00 [14.00, 35.00]    | 20.00 [14.00, 35.50]    | 20.00 [14.00, 34.00]    | 0.461   |
| <b>ASAT [U/l], median [IQR]</b>                    | 25.00 [20.00, 35.00]    | 25.00 [20.00, 35.00]    | 25.00 [20.00, 34.38]    | 0.118   |
| <b>CRP [mg/l], median [IQR]</b>                    | 12.00 [2.70, 56.00]     | 11.40 [2.50, 54.00]     | 18.50 [4.00, 68.50]     | <0.001  |
| <b>CRP [mg/l], n (%)</b>                           |                         |                         |                         | <0.001  |
| < 5                                                | 7884 (29.1)             | 7183 (30.2)             | 701 (21.2)              |         |
| 5-10                                               | 2680 (9.9)              | 2388 (10.0)             | 292 (8.8)               |         |
| 10-50                                              | 6070 (22.4)             | 5305 (22.3)             | 765 (23.2)              |         |
| >50                                                | 6116 (22.6)             | 5299 (22.3)             | 817 (24.7)              |         |
| Missing                                            | 4342 (16.0)             | 3615 (15.2)             | 727 (22.0)              |         |
| <b>Temperature [°C], median [IQR]</b>              | 36.55 [36.25, 36.90]    | 36.55 [36.23, 36.90]    | 36.58 [36.25, 36.90]    | 0.654   |
| <b>Systolic blood pressure [mmHg], mean (±SD)</b>  | 134.14 (19.77)          | 134.35 (19.82)          | 132.67 (19.32)          | <0.001  |
| <b>Diastolic blood pressure [mmHg], mean (±SD)</b> | 71.89 (11.67)           | 72.07 (11.80)           | 70.69 (10.70)           | <0.001  |
| <b>BMI, mean (±SD)</b>                             | 26.10 (5.25)            | 26.12 (5.26)            | 25.93 (5.22)            | 0.117   |
| <b>Polymedication, mean (±SD)</b>                  | 7.58 (3.84)             | 7.22 (3.71)             | 9.81 (3.89)             | <0.001  |
| <b>ACH burden per scale, mean (±SD)</b>            | -                       | 0.53 (0.88)             | 6.23 (4.47)             | <0.001  |

| Supplementary Table S2: Table 1's binary approach  |                         |                         |                         |         |
|----------------------------------------------------|-------------------------|-------------------------|-------------------------|---------|
|                                                    | Overall                 | PI Low <3               | PI High ≥3              | p-value |
| <b>n</b>                                           | 27092                   | 24955                   | 2137                    |         |
| <b>Died, n (%)</b>                                 | 913 (3.4)               | 791 (3.2)               | 122 (5.7)               | <0.001  |
| <b>Length of stay, median days [IQR]</b>           | 6.00 [4.00, 10.00]      | 6.00 [4.00, 10.00]      | 7.00 [5.00, 12.00]      | <0.001  |
| <b>Age, mean years (±SD)</b>                       | 78.08 (7.69)            | 77.79 (7.64)            | 81.40 (7.49)            | <0.001  |
| <b>Age, n (%)</b>                                  |                         |                         |                         | <0.001  |
| 65-75 years                                        | 10932 (40.4)            | 10425 (41.8)            | 507 (23.7)              |         |
| 76-85 years                                        | 11012 (40.6)            | 10066 (40.3)            | 946 (44.3)              |         |
| 86-95 years                                        | 4958 (18.3)             | 4303 (17.2)             | 655 (30.7)              |         |
| >95 years                                          | 190 (0.7)               | 161 (0.6)               | 29 (1.4)                |         |
| <b>Female sex, n (%)</b>                           | 14014 (51.7)            | 12870 (51.6)            | 1144 (53.5)             | 0.086   |
| <b>Departement, n (%)</b>                          |                         |                         |                         |         |
| Medical departement                                | 15119 (55.8)            | 13667 (54.8)            | 1452 (67.9)             | <0.001  |
| Surgical departement                               | 11973 (44.2)            | 11288 (45.2)            | 685 (32.1)              |         |
| <b>Hearing device, n (%)</b>                       |                         |                         |                         | 0.002   |
| None                                               | 15674 (57.9)            | 14476 (58.0)            | 1198 (56.1)             |         |
| Hearing device                                     | 2976 (11.0)             | 2693 (10.8)             | 283 (13.2)              |         |
| <i>Missing</i>                                     | <i>8442 (31.2)</i>      | <i>7786 (31.2)</i>      | <i>656 (30.7)</i>       |         |
| <b>Visual aid, n (%)</b>                           |                         |                         |                         | <0.001  |
| None                                               | 4956 (18.3)             | 4462 (17.9)             | 494 (23.1)              |         |
| Glasses or contacts                                | 13630 (50.3)            | 12642 (50.7)            | 988 (46.2)              |         |
| <i>Missing</i>                                     | <i>8506 (31.4)</i>      | <i>7851 (31.5)</i>      | <i>655 (30.7)</i>       |         |
| <b>Acute myocardial infarction, n (%)</b>          | 1442 (5.3)              | 1349 (5.4)              | 93 (4.4)                | 0.042   |
| <b>Congestive heart failure, n (%)</b>             | 4751 (17.5)             | 4243 (17.0)             | 508 (23.8)              | <0.001  |
| <b>Peripheal vascular disease, n (%)</b>           | 3691 (13.6)             | 3383 (13.6)             | 308 (14.4)              | 0.283   |
| <b>Cerebrovascular disease, n (%)</b>              | 3462 (12.8)             | 3149 (12.6)             | 313 (14.6)              | 0.008   |
| <b>Dementia, n (%)</b>                             | 2595 (9.6)              | 1804 (7.2)              | 791 (37.0)              | <0.001  |
| <b>COPD, n (%)</b>                                 | 3041 (11.2)             | 2810 (11.3)             | 231 (10.8)              | 0.55    |
| <b>Rheumatoid disease, n (%)</b>                   | 798 (2.9)               | 746 (3.0)               | 52 (2.4)                | 0.164   |
| <b>Peptic ulcer disease, n (%)</b>                 | 542 (2.0)               | 496 (2.0)               | 46 (2.2)                | 0.658   |
| <b>Liverdisease, n (%)</b>                         | 541 (2.0)               | 508 (2.0)               | 33 (1.5)                | 0.139   |
| <b>Diabetes, n (%)</b>                             | 5692 (21.0)             | 5183 (20.8)             | 509 (23.8)              | 0.001   |
| <b>Hemiplegia, Paraplegia, n (%)</b>               | 1232 (4.5)              | 1114 (4.5)              | 118 (5.5)               | 0.028   |
| <b>Renal dysfunction, n (%)</b>                    | 6176 (22.8)             | 5515 (22.1)             | 661 (30.9)              | <0.001  |
| <b>Cancer, n (%)</b>                               | 4625 (17.1)             | 4362 (17.5)             | 263 (12.3)              | <0.001  |
| <b>Delirium, n (%)</b>                             | 1695 (6.3)              | 1185 (4.7)              | 510 (23.9)              | <0.001  |
| <b>Self-care Index, median [IQR]</b>               | 39.00 [34.00, 40.00]    | 39.00 [35.00, 40.00]    | 34.00 [26.25, 39.00]    | <0.001  |
| <b>Braden, median [IQR]</b>                        | 22.00 [20.00, 23.00]    | 22.00 [20.00, 23.00]    | 20.00 [17.00, 22.00]    | <0.001  |
| <b>Nutrition deficiency score, median [IQR]</b>    | 1.00 [1.00, 2.00]       | 1.00 [1.00, 2.00]       | 1.00 [1.00, 2.00]       | <0.001  |
| <b>Catheterisation, n (%)</b>                      | 7873 (29.1)             | 7106 (28.5)             | 767 (35.9)              | <0.001  |
| <b>Surgery during stay, n (%)</b>                  | 8676 (32.0)             | 8174 (32.8)             | 502 (23.5)              | <0.001  |
| <b>GFR [ml/min], median [IQR]</b>                  | 64.00 [45.00, 80.00]    | 64.00 [45.00, 81.00]    | 59.00 [41.00, 77.00]    | <0.001  |
| <b>Creatinine [µmol/l], median [IQR]</b>           | 87.00 [70.00, 115.50]   | 87.00 [70.00, 115.00]   | 91.00 [71.50, 120.00]   | 0.001   |
| <b>Sodium [mmol/l], median [IQR]</b>               | 138.00 [135.00, 140.00] | 138.00 [135.00, 140.00] | 138.50 [136.00, 140.67] | <0.001  |
| <b>Potassium [mmol/l], median [IQR]</b>            | 4.05 [3.80, 4.35]       | 4.05 [3.80, 4.35]       | 4.10 [3.75, 4.40]       | 0.228   |
| <b>ALAT [U/l], median [IQR]</b>                    | 20.00 [14.00, 35.00]    | 20.00 [14.00, 35.50]    | 19.00 [12.00, 33.00]    | 0.004   |
| <b>ASAT [U/l], median [IQR]</b>                    | 25.00 [20.00, 35.00]    | 25.00 [20.00, 35.00]    | 25.00 [20.00, 34.00]    | 0.034   |
| <b>CRP [mg/l], median [IQR]</b>                    | 12.00 [2.70, 56.00]     | 11.90 [2.50, 55.15]     | 17.00 [3.90, 61.30]     | <0.001  |
| <b>CRP [mg/l], n (%)</b>                           |                         |                         |                         | <0.001  |
| < 5                                                | 7884 (29.1)             | 7377 (29.6)             | 507 (23.7)              |         |
| 5-10                                               | 2680 (9.9)              | 2469 (9.9)              | 211 (9.9)               |         |
| 10-50                                              | 6070 (22.4)             | 5535 (22.2)             | 535 (25.0)              |         |
| >50                                                | 6116 (22.6)             | 5604 (22.5)             | 512 (24.0)              |         |
| <i>Missing</i>                                     | <i>4342 (16.0)</i>      | <i>3970 (15.9)</i>      | <i>372 (17.4)</i>       |         |
| <b>Temperature [°C], median [IQR]</b>              | 36.55 [36.25, 36.90]    | 36.55 [36.23, 36.90]    | 36.60 [36.30, 37.00]    | <0.001  |
| <b>Systolic blood pressure [mmHg], mean (±SD)</b>  | 134.14 (19.77)          | 134.32 (19.79)          | 132.14 (19.35)          | <0.001  |
| <b>Diastolic blood pressure [mmHg], mean (±SD)</b> | 71.89 (11.67)           | 72.04 (11.70)           | 70.26 (11.23)           | <0.001  |
| <b>BMI, mean (±SD)</b>                             | 26.10 (5.25)            | 26.15 (5.25)            | 25.40 (5.28)            | <0.001  |
| <b>Polymedication, mean (±SD)</b>                  | 7.58 (3.84)             | 7.38 (3.77)             | 9.63 (3.96)             | <0.001  |
| <b>ACH burden per scale, mean (±SD)</b>            | -                       | 0.01 (0.26)             | 1031.65 (771.93)        | <0.001  |

| Supplementary Table S2: Table 1's binary approach  |                         |                         |                         |         |
|----------------------------------------------------|-------------------------|-------------------------|-------------------------|---------|
|                                                    | Overall                 | CI Low <3               | CI High ≥3              | p-value |
| <b>n</b>                                           | 27092                   | 25086                   | 2006                    |         |
| <b>Died, n (%)</b>                                 | 913 (3.4)               | 795 (3.2)               | 118 (5.9)               | <0.001  |
| <b>Length of stay, median days [IQR]</b>           | 6.00 [4.00, 10.00]      | 6.00 [4.00, 10.00]      | 7.00 [5.00, 11.00]      | <0.001  |
| <b>Age, mean years (±SD)</b>                       | 78.08 (7.69)            | 77.80 (7.63)            | 81.52 (7.51)            | <0.001  |
| <b>Age, n (%)</b>                                  |                         |                         |                         | <0.001  |
| 65-75 years                                        | 10932 (40.4)            | 10464 (41.7)            | 468 (23.3)              |         |
| 76-85 years                                        | 11012 (40.6)            | 10131 (40.4)            | 881 (43.9)              |         |
| 86-95 years                                        | 4958 (18.3)             | 4330 (17.3)             | 628 (31.3)              |         |
| >95 years                                          | 190 (0.7)               | 161 (0.6)               | 29 (1.4)                |         |
| <b>Female sex, n (%)</b>                           | 14014 (51.7)            | 12955 (51.6)            | 1059 (52.8)             | 0.333   |
| <b>Departement, n (%)</b>                          |                         |                         |                         |         |
| Medical departement                                | 15119 (55.8)            | 13747 (54.8)            | 1372 (68.4)             | <0.001  |
| Surgical departement                               | 11973 (44.2)            | 11339 (45.2)            | 634 (31.6)              |         |
| <b>Hearing device, n (%)</b>                       |                         |                         |                         | 0.005   |
| None                                               | 15674 (57.9)            | 14545 (58.0)            | 1129 (56.3)             |         |
| Hearing device                                     | 2976 (11.0)             | 2712 (10.8)             | 264 (13.2)              |         |
| Missing                                            | 8442 (31.2)             | 7829 (31.2)             | 613 (30.6)              |         |
| <b>Visual aid, n (%)</b>                           |                         |                         |                         | <0.001  |
| None                                               | 4956 (18.3)             | 4485 (17.9)             | 471 (23.5)              |         |
| Glasses or contacts                                | 13630 (50.3)            | 12709 (50.7)            | 921 (45.9)              |         |
| Missing                                            | 8506 (31.4)             | 7892 (31.5)             | 614 (30.6)              |         |
| <b>Acute myocardial infarction, n (%)</b>          | 1442 (5.3)              | 1357 (5.4)              | 85 (4.2)                | 0.028   |
| <b>Congestive heart failure, n (%)</b>             | 4751 (17.5)             | 4271 (17.0)             | 480 (23.9)              | <0.001  |
| <b>Peripheal vascular disease, n (%)</b>           | 3691 (13.6)             | 3406 (13.6)             | 285 (14.2)              | 0.449   |
| <b>Cerebrovascular disease, n (%)</b>              | 3462 (12.8)             | 3168 (12.6)             | 294 (14.7)              | 0.01    |
| <b>Dementia, n (%)</b>                             | 2595 (9.6)              | 1820 (7.3)              | 775 (38.6)              | <0.001  |
| <b>COPD, n (%)</b>                                 | 3041 (11.2)             | 2836 (11.3)             | 205 (10.2)              | 0.148   |
| <b>Rheumatoid disease, n (%)</b>                   | 798 (2.9)               | 750 (3.0)               | 48 (2.4)                | 0.146   |
| <b>Peptic ulcer disease, n (%)</b>                 | 542 (2.0)               | 500 (2.0)               | 42 (2.1)                | 0.821   |
| <b>Liverdisease, n (%)</b>                         | 541 (2.0)               | 507 (2.0)               | 34 (1.7)                | 0.357   |
| <b>Diabetes, n (%)</b>                             | 5692 (21.0)             | 5216 (20.8)             | 476 (23.7)              | 0.002   |
| <b>Hemiplegia, Paraplegia, n (%)</b>               | 1232 (4.5)              | 1116 (4.4)              | 116 (5.8)               | 0.007   |
| <b>Renal dysfunction, n (%)</b>                    | 6176 (22.8)             | 5565 (22.2)             | 611 (30.5)              | <0.001  |
| <b>Cancer, n (%)</b>                               | 4625 (17.1)             | 4379 (17.5)             | 246 (12.3)              | <0.001  |
| <b>Delirium, n (%)</b>                             | 1695 (6.3)              | 1193 (4.8)              | 502 (25.0)              | <0.001  |
| <b>Self-care Index, median [IQR]</b>               | 39.00 [34.00, 40.00]    | 39.00 [35.00, 40.00]    | 33.00 [26.00, 39.00]    | <0.001  |
| <b>Braden, median [IQR]</b>                        | 22.00 [20.00, 23.00]    | 22.00 [20.00, 23.00]    | 20.00 [17.00, 22.00]    | <0.001  |
| <b>Nutrition deficiency score, median [IQR]</b>    | 1.00 [1.00, 2.00]       | 1.00 [1.00, 2.00]       | 1.00 [1.00, 2.00]       | <0.001  |
| <b>Catheterisation, n (%)</b>                      | 7873 (29.1)             | 7139 (28.5)             | 734 (36.6)              | <0.001  |
| <b>Surgery during stay, n (%)</b>                  | 8676 (32.0)             | 8209 (32.7)             | 467 (23.3)              | <0.001  |
| <b>GFR [ml/min], median [IQR]</b>                  | 64.00 [45.00, 80.00]    | 64.00 [45.00, 81.00]    | 59.00 [41.00, 76.50]    | <0.001  |
| <b>Creatinine [µmol/l], median [IQR]</b>           | 87.00 [70.00, 115.50]   | 87.00 [70.00, 115.00]   | 91.00 [72.00, 120.00]   | 0.001   |
| <b>Sodium [mmol/l], median [IQR]</b>               | 138.00 [135.00, 140.00] | 138.00 [135.00, 140.00] | 138.50 [136.00, 141.00] | <0.001  |
| <b>Potassium [mmol/l], median [IQR]</b>            | 4.05 [3.80, 4.35]       | 4.05 [3.80, 4.35]       | 4.10 [3.75, 4.40]       | 0.104   |
| <b>ALAT [U/l], median [IQR]</b>                    | 20.00 [14.00, 35.00]    | 20.00 [14.00, 35.12]    | 19.00 [12.00, 33.50]    | 0.004   |
| <b>ASAT [U/l], median [IQR]</b>                    | 25.00 [20.00, 35.00]    | 25.00 [20.00, 35.00]    | 25.00 [20.00, 34.50]    | 0.052   |
| <b>CRP [mg/l], median [IQR]</b>                    | 12.00 [2.70, 56.00]     | 11.88 [2.50, 55.24]     | 17.70 [4.00, 62.02]     | <0.001  |
| <b>CRP [mg/l], n (%)</b>                           |                         |                         |                         | <0.001  |
| < 5                                                | 7884 (29.1)             | 7427 (29.6)             | 457 (22.8)              |         |
| 5-10                                               | 2680 (9.9)              | 2477 (9.9)              | 203 (10.1)              |         |
| 10-50                                              | 6070 (22.4)             | 5565 (22.2)             | 505 (25.2)              |         |
| >50                                                | 6116 (22.6)             | 5637 (22.5)             | 479 (23.9)              |         |
| Missing                                            | 4342 (16.0)             | 3980 (15.9)             | 362 (18.0)              |         |
| <b>Temperature [°C], median [IQR]</b>              | 36.55 [36.25, 36.90]    | 36.55 [36.23, 36.90]    | 36.60 [36.30, 37.00]    | <0.001  |
| <b>Systolic blood pressure [mmHg], mean (±SD)</b>  | 134.14 (19.77)          | 134.32 (19.79)          | 131.94 (19.39)          | <0.001  |
| <b>Diastolic blood pressure [mmHg], mean (±SD)</b> | 71.89 (11.67)           | 72.04 (11.70)           | 70.19 (11.27)           | <0.001  |
| <b>BMI, mean (±SD)</b>                             | 26.10 (5.25)            | 26.15 (5.26)            | 25.37 (5.19)            | <0.001  |
| <b>Polymedication, mean (±SD)</b>                  | 7.58 (3.84)             | 7.40 (3.78)             | 9.57 (3.94)             | <0.001  |
| <b>ACH burden per scale, mean (±SD)</b>            | -                       | 0.14 (1.80)             | 340.20 (233.92)         |         |

| Supplementary Table S2: Table 1's binary approach  |                         |                         |                         |         |
|----------------------------------------------------|-------------------------|-------------------------|-------------------------|---------|
|                                                    | Overall                 | GABS Low <3             | GABS High ≥3            | p-value |
| <b>n</b>                                           | 27092                   | 18586                   | 8506                    |         |
| <b>Died, n (%)</b>                                 | 913 (3.4)               | 487 (2.6)               | 426 (5.0)               | <0.001  |
| <b>Length of stay, median days [IQR]</b>           | 6.00 [4.00, 10.00]      | 6.00 [4.00, 10.00]      | 7.00 [5.00, 11.00]      | <0.001  |
| <b>Age, mean years (±SD)</b>                       | 78.08 (7.69)            | 77.77 (7.64)            | 78.74 (7.74)            | <0.001  |
| <b>Age, n (%)</b>                                  |                         |                         |                         | <0.001  |
| 65-75 years                                        | 10932 (40.4)            | 7807 (42.0)             | 3125 (36.7)             |         |
| 76-85 years                                        | 11012 (40.6)            | 7480 (40.2)             | 3532 (41.5)             |         |
| 86-95 years                                        | 4958 (18.3)             | 3178 (17.1)             | 1780 (20.9)             |         |
| >95 years                                          | 190 (0.7)               | 121 (0.7)               | 69 (0.8)                |         |
| <b>Female sex, n (%)</b>                           | 14014 (51.7)            | 9333 (50.2)             | 4681 (55.0)             | <0.001  |
| <b>Departement, n (%)</b>                          |                         |                         |                         |         |
| Medical departement                                | 15119 (55.8)            | 9884 (53.2)             | 5235 (61.5)             | <0.001  |
| Surgical departement                               | 11973 (44.2)            | 8702 (46.8)             | 8080 (38.5)             |         |
| <b>Hearing device, n (%)</b>                       |                         |                         |                         | <0.001  |
| None                                               | 15674 (57.9)            | 10502 (56.5)            | 5172 (60.8)             |         |
| Hearing device                                     | 2976 (11.0)             | 1983 (10.7)             | 993 (11.7)              |         |
| <i>Missing</i>                                     | <i>8442 (31.2)</i>      | <i>6101 (32.8)</i>      | <i>2341 (27.5)</i>      |         |
| <b>Visual aid, n (%)</b>                           |                         |                         |                         | <0.001  |
| None                                               | 4956 (18.3)             | 3238 (17.4)             | 1718 (20.2)             |         |
| Glasses or contacts                                | 13630 (50.3)            | 9197 (49.5)             | 4433 (52.1)             |         |
| <i>Missing</i>                                     | <i>8506 (31.4)</i>      | <i>6151 (33.1)</i>      | <i>2355 (27.7)</i>      |         |
| <b>Acute myocardial infarction, n (%)</b>          | 1442 (5.3)              | 1024 (5.5)              | 418 (4.9)               | 0.046   |
| <b>Congestive heart failure, n (%)</b>             | 4751 (17.5)             | 2762 (14.9)             | 1989 (23.4)             | <0.001  |
| <b>Peripheal vascular disease, n (%)</b>           | 3691 (13.6)             | 2380 (12.8)             | 1311 (15.4)             | <0.001  |
| <b>Cerebrovascular disease, n (%)</b>              | 3462 (12.8)             | 2551 (13.7)             | 911 (10.7)              | <0.001  |
| <b>Dementia, n (%)</b>                             | 2595 (9.6)              | 1389 (7.5)              | 1206 (14.2)             | <0.001  |
| <b>COPD, n (%)</b>                                 | 3041 (11.2)             | 1573 (8.5)              | 1468 (17.3)             | <0.001  |
| <b>Rheumatoid disease, n (%)</b>                   | 798 (2.9)               | 435 (2.3)               | 363 (4.3)               | <0.001  |
| <b>Peptic ulcer disease, n (%)</b>                 | 542 (2.0)               | 373 (2.0)               | 169 (2.0)               | 0.95    |
| <b>Liverdisease, n (%)</b>                         | 541 (2.0)               | 380 (2.0)               | 161 (1.9)               | 0.434   |
| <b>Diabetes, n (%)</b>                             | 5692 (21.0)             | 3516 (18.9)             | 2176 (25.6)             | <0.001  |
| <b>Hemiplegia, Paraplegia, n (%)</b>               | 1232 (4.5)              | 861 (4.6)               | 371 (4.4)               | 0.336   |
| <b>Renal dysfunction, n (%)</b>                    | 6176 (22.8)             | 3861 (20.8)             | 2315 (27.2)             | <0.001  |
| <b>Cancer, n (%)</b>                               | 4625 (17.1)             | 3192 (17.2)             | 1433 (16.8)             | 0.518   |
| <b>Delirium, n (%)</b>                             | 1695 (6.3)              | 889 (4.8)               | 806 (9.5)               | <0.001  |
| <b>Self-care Index, median [IQR]</b>               | 39.00 [34.00, 40.00]    | 40.00 [36.00, 40.00]    | 37.00 [32.00, 40.00]    | <0.001  |
| <b>Braden, median [IQR]</b>                        | 22.00 [20.00, 23.00]    | 23.00 [21.00, 23.00]    | 21.00 [18.00, 23.00]    | <0.001  |
| <b>Nutrition deficiency score, median [IQR]</b>    | 1.00 [1.00, 2.00]       | 1.00 [1.00, 1.00]       | 1.00 [1.00, 2.00]       | <0.001  |
| <b>Catheterisation, n (%)</b>                      | 7873 (29.1)             | 5372 (28.9)             | 2501 (29.4)             | 0.409   |
| <b>Surgery during stay, n (%)</b>                  | 8676 (32.0)             | 6475 (34.8)             | 2201 (25.9)             | <0.001  |
| <b>GFR [ml/min], median [IQR]</b>                  | 64.00 [45.00, 80.00]    | 64.00 [46.00, 80.50]    | 62.00 [43.88, 80.00]    | 0.001   |
| <b>Creatinine [µmol/l], median [IQR]</b>           | 87.00 [70.00, 115.50]   | 87.00 [70.50, 114.50]   | 87.50 [69.00, 117.50]   | 0.57    |
| <b>Sodium [mmol/l], median [IQR]</b>               | 138.00 [135.00, 140.00] | 138.00 [135.50, 140.00] | 138.00 [135.00, 140.00] | <0.001  |
| <b>Potassium [mmol/l], median [IQR]</b>            | 4.05 [3.80, 4.35]       | 4.05 [3.80, 4.30]       | 4.05 [3.75, 4.40]       | 0.111   |
| <b>ALAT [U/l], median [IQR]</b>                    | 20.00 [14.00, 35.00]    | 21.00 [14.00, 36.00]    | 20.00 [13.00, 34.00]    | 0.017   |
| <b>ASAT [U/l], median [IQR]</b>                    | 25.00 [20.00, 35.00]    | 25.00 [20.00, 35.00]    | 25.00 [20.00, 35.00]    | 0.125   |
| <b>CRP [mg/l], median [IQR]</b>                    | 12.00 [2.70, 56.00]     | 9.70 [2.00, 50.00]      | 19.00 [4.00, 67.00]     | <0.001  |
| <b>CRP [mg/l], n (%)</b>                           |                         |                         |                         | <0.001  |
| < 5                                                | 7884 (29.1)             | 5901 (31.7)             | 1983 (23.3)             |         |
| 5-10                                               | 2680 (9.9)              | 1808 (9.7)              | 872 (10.3)              |         |
| 10-50                                              | 6070 (22.4)             | 3823 (20.6)             | 2247 (26.4)             |         |
| >50                                                | 6116 (22.6)             | 3819 (20.5)             | 2297 (27.0)             |         |
| <i>Missing</i>                                     | <i>4342 (16.0)</i>      | <i>3235 (17.4)</i>      | <i>1107 (13.0)</i>      |         |
| <b>Temperature [°C], median [IQR]</b>              | 36.55 [36.25, 36.90]    | 36.53 [36.20, 36.90]    | 36.60 [36.30, 36.95]    | <0.001  |
| <b>Systolic blood pressure [mmHg], mean (±SD)</b>  | 134.14 (19.77)          | 134.77 (19.98)          | 132.85 (19.26)          | <0.001  |
| <b>Diastolic blood pressure [mmHg], mean (±SD)</b> | 71.89 (11.67)           | 72.47 (11.97)           | 70.72 (10.95)           | <0.001  |
| <b>BMI, mean (±SD)</b>                             | 26.10 (5.25)            | 26.06 (5.02)            | 26.18 (5.72)            | 0.172   |
| <b>Polymedication, mean (±SD)</b>                  | 7.58 (3.84)             | 6.18 (3.17)             | 10.17 (3.63)            | <0.001  |
| <b>ACH burden per scale, mean (±SD)</b>            | -                       | 0.66 (0.79)             | 5.39 (2.86)             | <0.001  |

| Supplementary Table S2: Table 1's binary approach  |                         |                         |                         |         |
|----------------------------------------------------|-------------------------|-------------------------|-------------------------|---------|
|                                                    | Overall                 | DS Low <3               | DS High ≥3              | p-value |
| <b>n</b>                                           | 27092                   | 19302                   | 7790                    |         |
| <b>Died, n (%)</b>                                 | 913 (3.4)               | 477 (2.5)               | 436 (5.6)               | <0.001  |
| <b>Length of stay, median days [IQR]</b>           | 6.00 [4.00, 10.00]      | 6.00 [4.00, 10.00]      | 7.00 [5.00, 12.00]      | <0.001  |
| <b>Age, mean years (±SD)</b>                       | 78.08 (7.69)            | 77.82 (7.61)            | 78.72 (7.84)            | <0.001  |
| <b>Age, n (%)</b>                                  |                         |                         |                         | <0.001  |
| 65-75 years                                        | 10932 (40.4)            | 8058 (41.7)             | 2874 (36.9)             |         |
| 76-85 years                                        | 11012 (40.6)            | 7809 (40.5)             | 3203 (41.1)             |         |
| 86-95 years                                        | 4958 (18.3)             | 3315 (17.2)             | 1643 (21.1)             |         |
| >95 years                                          | 190 (0.7)               | 120 (0.6)               | 70 (0.9)                |         |
| <b>Female sex, n (%)</b>                           | 14014 (51.7)            | 9599 (49.7)             | 4415 (56.7)             | <0.001  |
| <b>Departement, n (%)</b>                          |                         |                         |                         |         |
| Medical departement                                | 15119 (55.8)            | 10331 (53.5)            | 4788 (61.5)             | <0.001  |
| Surgical departement                               | 11973 (44.2)            | 8971 (46.5)             | 3002 (38.5)             |         |
| <b>Hearing device, n (%)</b>                       |                         |                         |                         | <0.001  |
| None                                               | 15674 (57.9)            | 10980 (56.9)            | 4694 (60.3)             |         |
| Hearing device                                     | 2976 (11.0)             | 2085 (10.8)             | 891 (11.4)              |         |
| Missing                                            | 8442 (31.2)             | 6237 (32.3)             | 2205 (28.3)             |         |
| <b>Visual aid, n (%)</b>                           |                         |                         |                         | <0.001  |
| None                                               | 4956 (18.3)             | 3370 (17.5)             | 1586 (20.4)             |         |
| Glasses or contacts                                | 13630 (50.3)            | 9648 (50.0)             | 3982 (51.1)             |         |
| Missing                                            | 8506 (31.4)             | 6284 (32.6)             | 2222 (28.5)             |         |
| <b>Acute myocardial infarction, n (%)</b>          | 1442 (5.3)              | 1107 (5.7)              | 335 (4.3)               | <0.001  |
| <b>Congestive heart failure, n (%)</b>             | 4751 (17.5)             | 2972 (15.4)             | 1779 (22.8)             | <0.001  |
| <b>Peripheal vascular disease, n (%)</b>           | 3691 (13.6)             | 2565 (13.3)             | 1126 (14.5)             | 0.012   |
| <b>Cerebrovascular disease, n (%)</b>              | 3462 (12.8)             | 2660 (13.8)             | 802 (10.3)              | <0.001  |
| <b>Dementia, n (%)</b>                             | 2595 (9.6)              | 1502 (7.8)              | 1093 (14.0)             | <0.001  |
| <b>COPD, n (%)</b>                                 | 3041 (11.2)             | 1586 (8.2)              | 1455 (18.7)             | <0.001  |
| <b>Rheumatoid disease, n (%)</b>                   | 798 (2.9)               | 487 (2.5)               | 311 (4.0)               | <0.001  |
| <b>Peptic ulcer disease, n (%)</b>                 | 542 (2.0)               | 386 (2.0)               | 156 (2.0)               | 1       |
| <b>Liverdisease, n (%)</b>                         | 541 (2.0)               | 400 (2.1)               | 141 (1.8)               | 0.177   |
| <b>Diabetes, n (%)</b>                             | 5692 (21.0)             | 3917 (20.3)             | 1775 (22.8)             | <0.001  |
| <b>Hemiplegia, Paraplegia, n (%)</b>               | 1232 (4.5)              | 889 (4.6)               | 343 (4.4)               | 0.489   |
| <b>Renal dysfunction, n (%)</b>                    | 6176 (22.8)             | 4175 (21.6)             | 2001 (25.7)             | <0.001  |
| <b>Cancer, n (%)</b>                               | 4625 (17.1)             | 3349 (17.4)             | 1276 (16.4)             | 0.057   |
| <b>Delirium, n (%)</b>                             | 1695 (6.3)              | 962 (5.0)               | 733 (9.4)               | <0.001  |
| <b>Self-care Index, median [IQR]</b>               | 39.00 [34.00, 40.00]    | 39.00 [36.00, 40.00]    | 36.00 [31.00, 40.00]    | <0.001  |
| <b>Braden, median [IQR]</b>                        | 22.00 [20.00, 23.00]    | 23.00 [21.00, 23.00]    | 21.00 [18.00, 23.00]    | <0.001  |
| <b>Nutrition deficiency score, median [IQR]</b>    | 1.00 [1.00, 2.00]       | 1.00 [1.00, 1.00]       | 1.00 [1.00, 2.00]       | <0.001  |
| <b>Catheterisation, n (%)</b>                      | 7873 (29.1)             | 5580 (28.9)             | 2293 (29.4)             | 0.396   |
| <b>Surgery during stay, n (%)</b>                  | 8676 (32.0)             | 6601 (34.2)             | 2075 (26.6)             | <0.001  |
| <b>GFR [ml/min], median [IQR]</b>                  | 64.00 [45.00, 80.00]    | 64.00 [45.00, 80.00]    | 63.00 [44.00, 81.00]    | 0.971   |
| <b>Creatinine [µmol/l], median [IQR]</b>           | 87.00 [70.00, 115.50]   | 87.50 [71.00, 115.50]   | 86.00 [68.00, 116.00]   | <0.001  |
| <b>Sodium [mmol/l], median [IQR]</b>               | 138.00 [135.00, 140.00] | 138.00 [135.50, 140.00] | 138.00 [135.00, 140.00] | <0.001  |
| <b>Potassium [mmol/l], median [IQR]</b>            | 4.05 [3.80, 4.35]       | 4.05 [3.80, 4.35]       | 4.05 [3.75, 4.40]       | 0.147   |
| <b>ALAT [U/l], median [IQR]</b>                    | 20.00 [14.00, 35.00]    | 20.25 [14.00, 35.50]    | 20.00 [13.00, 35.00]    | 0.028   |
| <b>ASAT [U/l], median [IQR]</b>                    | 25.00 [20.00, 35.00]    | 25.00 [20.00, 35.00]    | 25.00 [20.00, 35.00]    | 0.445   |
| <b>CRP [mg/l], median [IQR]</b>                    | 12.00 [2.70, 56.00]     | 9.15 [2.00, 48.50]      | 21.80 [5.00, 70.00]     | <0.001  |
| <b>CRP [mg/l], n (%)</b>                           |                         |                         |                         | <0.001  |
| < 5                                                | 7884 (29.1)             | 6242 (32.3)             | 1642 (21.1)             |         |
| 5-10                                               | 2680 (9.9)              | 1920 (9.9)              | 760 (9.8)               |         |
| 10-50                                              | 6070 (22.4)             | 3974 (20.6)             | 2096 (26.9)             |         |
| >50                                                | 6116 (22.6)             | 3907 (20.2)             | 2209 (28.4)             |         |
| Missing                                            | 4342 (16.0)             | 3259 (16.9)             | 1083 (13.9)             |         |
| <b>Temperature [°C], median [IQR]</b>              | 36.55 [36.25, 36.90]    | 36.51 [36.20, 36.90]    | 36.60 [36.30, 37.00]    | <0.001  |
| <b>Systolic blood pressure [mmHg], mean (±SD)</b>  | 134.14 (19.77)          | 134.98 (19.92)          | 132.18 (19.27)          | <0.001  |
| <b>Diastolic blood pressure [mmHg], mean (±SD)</b> | 71.89 (11.67)           | 72.53 (11.90)           | 70.42 (10.99)           | <0.001  |
| <b>BMI, mean (±SD)</b>                             | 26.10 (5.25)            | 26.16 (5.03)            | 25.93 (5.77)            | 0.009   |
| <b>Polymedication, mean (±SD)</b>                  | 7.58 (3.84)             | 6.45 (3.34)             | 9.98 (3.74)             | <0.001  |
| <b>ACH burden per scale, mean (±SD)</b>            | -                       | 0.54 (0.80)             | 7.13 (4.24)             | <0.001  |



| Supplementary Table S2: Table 1's binary approach  |                         |                         |                         |         |
|----------------------------------------------------|-------------------------|-------------------------|-------------------------|---------|
|                                                    | Overall                 | BAADS Low <3            | BAADS High ≥3           | p-value |
| <b>n</b>                                           | 27092                   | 18949                   | 8143                    |         |
| <b>Died, n (%)</b>                                 | 913 (3.4)               | 473 (2.5)               | 440 (5.4)               | <0.001  |
| <b>Length of stay, median days [IQR]</b>           | 6.00 [4.00, 10.00]      | 6.00 [4.00, 10.00]      | 7.00 [5.00, 11.00]      | <0.001  |
| <b>Age, mean years (±SD)</b>                       | 78.08 (7.69)            | 77.72 (7.63)            | 78.91 (7.76)            | <0.001  |
| <b>Age, n (%)</b>                                  |                         |                         |                         | <0.001  |
| 65-75 years                                        | 10932 (40.4)            | 8021 (42.3)             | 2911 (35.7)             |         |
| 76-85 years                                        | 11012 (40.6)            | 7577 (40.0)             | 3435 (42.2)             |         |
| 86-95 years                                        | 4958 (18.3)             | 3231 (17.1)             | 1727 (21.2)             |         |
| >95 years                                          | 190 (0.7)               | 120 (0.6)               | 70 (0.9)                |         |
| <b>Female sex, n (%)</b>                           | 14014 (51.7)            | 9466 (50.0)             | 4548 (55.9)             | <0.001  |
| <b>Departement, n (%)</b>                          |                         |                         |                         |         |
| Medical departement                                | 15119 (55.8)            | 9800 (51.7)             | 5319 (65.3)             | <0.001  |
| Surgical departement                               | 11973 (44.2)            | 9149 (48.3)             | 2824 (34.7)             |         |
| <b>Hearing device, n (%)</b>                       |                         |                         |                         | <0.001  |
| None                                               | 15674 (57.9)            | 10789 (56.9)            | 4885 (60.0)             |         |
| Hearing device                                     | 2976 (11.0)             | 2048 (10.8)             | 928 (11.4)              |         |
| Missing                                            | 8442 (31.2)             | 6112 (32.3)             | 2330 (28.6)             |         |
| <b>Visual aid, n (%)</b>                           |                         |                         |                         | <0.001  |
| None                                               | 4956 (18.3)             | 3299 (17.4)             | 1657 (20.3)             |         |
| Glasses or contacts                                | 13630 (50.3)            | 9481 (50.0)             | 4149 (51.0)             |         |
| Missing                                            | 8506 (31.4)             | 6169 (32.6)             | 2337 (28.7)             |         |
| <b>Acute myocardial infarction, n (%)</b>          | 1442 (5.3)              | 1043 (5.5)              | 399 (4.9)               | 0.045   |
| <b>Congestive heart failure, n (%)</b>             | 4751 (17.5)             | 2765 (14.6)             | 1986 (24.4)             | <0.001  |
| <b>Peripheal vascular disease, n (%)</b>           | 3691 (13.6)             | 2425 (12.8)             | 1266 (15.5)             | <0.001  |
| <b>Cerebrovascular disease, n (%)</b>              | 3462 (12.8)             | 2575 (13.6)             | 887 (10.9)              | <0.001  |
| <b>Dementia, n (%)</b>                             | 2595 (9.6)              | 1470 (7.8)              | 1125 (13.8)             | <0.001  |
| <b>COPD, n (%)</b>                                 | 3041 (11.2)             | 1371 (7.2)              | 1670 (20.5)             | <0.001  |
| <b>Rheumatoid disease, n (%)</b>                   | 798 (2.9)               | 447 (2.4)               | 351 (4.3)               | <0.001  |
| <b>Peptic ulcer disease, n (%)</b>                 | 542 (2.0)               | 359 (1.9)               | 183 (2.2)               | 0.064   |
| <b>Liverdisease, n (%)</b>                         | 541 (2.0)               | 396 (2.1)               | 145 (1.8)               | 0.105   |
| <b>Diabetes, n (%)</b>                             | 5692 (21.0)             | 3838 (20.3)             | 1854 (22.8)             | <0.001  |
| <b>Hemiplegia, Paraplegia, n (%)</b>               | 1232 (4.5)              | 875 (4.6)               | 357 (4.4)               | 0.416   |
| <b>Renal dysfunction, n (%)</b>                    | 6176 (22.8)             | 3896 (20.6)             | 2280 (28.0)             | <0.001  |
| <b>Cancer, n (%)</b>                               | 4625 (17.1)             | 3225 (17.0)             | 1400 (17.2)             | 0.741   |
| <b>Delirium, n (%)</b>                             | 1695 (6.3)              | 936 (4.9)               | 759 (9.3)               | <0.001  |
| <b>Self-care Index, median [IQR]</b>               | 39.00 [34.00, 40.00]    | 39.00 [36.00, 40.00]    | 37.00 [31.00, 40.00]    | <0.001  |
| <b>Braden, median [IQR]</b>                        | 22.00 [20.00, 23.00]    | 23.00 [21.00, 23.00]    | 21.00 [18.00, 23.00]    | <0.001  |
| <b>Nutrition deficiency score, median [IQR]</b>    | 1.00 [1.00, 2.00]       | 1.00 [1.00, 1.00]       | 1.00 [1.00, 2.00]       | <0.001  |
| <b>Catheterisation, n (%)</b>                      | 7873 (29.1)             | 5605 (29.6)             | 2268 (27.9)             | 0.004   |
| <b>Surgery during stay, n (%)</b>                  | 8676 (32.0)             | 6808 (35.9)             | 1868 (22.9)             | <0.001  |
| <b>GFR [ml/min], median [IQR]</b>                  | 64.00 [45.00, 80.00]    | 64.50 [46.00, 80.50]    | 62.00 [43.00, 80.00]    | <0.001  |
| <b>Creatinine [µmol/l], median [IQR]</b>           | 87.00 [70.00, 115.50]   | 87.00 [70.00, 114.00]   | 88.00 [69.00, 118.00]   | 0.734   |
| <b>Sodium [mmol/l], median [IQR]</b>               | 138.00 [135.00, 140.00] | 138.00 [135.50, 140.00] | 138.00 [135.00, 140.00] | <0.001  |
| <b>Potassium [mmol/l], median [IQR]</b>            | 4.05 [3.80, 4.35]       | 4.05 [3.80, 4.35]       | 4.05 [3.75, 4.40]       | 0.977   |
| <b>ALAT [U/l], median [IQR]</b>                    | 20.00 [14.00, 35.00]    | 20.00 [14.00, 36.00]    | 20.00 [13.00, 35.00]    | 0.074   |
| <b>ASAT [U/l], median [IQR]</b>                    | 25.00 [20.00, 35.00]    | 25.00 [20.00, 35.00]    | 25.00 [20.00, 35.00]    | 0.55    |
| <b>CRP [mg/l], median [IQR]</b>                    | 12.00 [2.70, 56.00]     | 9.50 [2.00, 48.86]      | 20.00 [4.40, 69.00]     | <0.001  |
| <b>CRP [mg/l], n (%)</b>                           |                         |                         |                         | <0.001  |
| < 5                                                | 7884 (29.1)             | 6015 (31.7)             | 1869 (23.0)             |         |
| 5-10                                               | 2680 (9.9)              | 1850 (9.8)              | 830 (10.2)              |         |
| 10-50                                              | 6070 (22.4)             | 3899 (20.6)             | 2171 (26.7)             |         |
| >50                                                | 6116 (22.6)             | 3812 (20.1)             | 2304 (28.3)             |         |
| Missing                                            | 4342 (16.0)             | 3373 (17.8)             | 969 (11.9)              |         |
| <b>Temperature [°C], median [IQR]</b>              | 36.55 [36.25, 36.90]    | 36.50 [36.20, 36.90]    | 36.60 [36.30, 37.00]    | <0.001  |
| <b>Systolic blood pressure [mmHg], mean (±SD)</b>  | 134.14 (19.77)          | 134.88 (19.91)          | 132.52 (19.36)          | <0.001  |
| <b>Diastolic blood pressure [mmHg], mean (±SD)</b> | 71.89 (11.67)           | 72.47 (11.92)           | 70.64 (11.02)           | <0.001  |
| <b>BMI, mean (±SD)</b>                             | 26.10 (5.25)            | 26.13 (5.02)            | 26.01 (5.75)            | 0.162   |
| <b>Polymedication, mean (±SD)</b>                  | 7.58 (3.84)             | 6.31 (3.24)             | 10.09 (3.71)            | <0.001  |
| <b>ACH burden per scale, mean (±SD)</b>            | -                       | 0.56 (0.75)             | 6.13 (3.75)             | <0.001  |

| Supplementary Table S2: Table 1's binary approach  |                         |                         |                         |         |
|----------------------------------------------------|-------------------------|-------------------------|-------------------------|---------|
|                                                    | Overall                 | KABS Low <3             | KABS High ≥3            | p-value |
| <b>n</b>                                           | 27092                   | 21416                   | 5676                    |         |
| <b>Died, n (%)</b>                                 | 913 (3.4)               | 597 (2.8)               | 316 (5.6)               | <0.001  |
| <b>Length of stay, median days [IQR]</b>           | 6.00 [4.00, 10.00]      | 6.00 [4.00, 10.00]      | 7.00 [5.00, 12.00]      | <0.001  |
| <b>Age, mean years (±SD)</b>                       | 78.08 (7.69)            | 77.84 (7.63)            | 78.97 (7.83)            | <0.001  |
| <b>Age, n (%)</b>                                  |                         |                         |                         | <0.001  |
| 65-75 years                                        | 10932 (40.4)            | 8899 (41.6)             | 2033 (35.8)             |         |
| 76-85 years                                        | 11012 (40.6)            | 8660 (40.4)             | 2352 (41.4)             |         |
| 86-95 years                                        | 4958 (18.3)             | 3720 (17.4)             | 1238 (21.8)             |         |
| >95 years                                          | 190 (0.7)               | 137 (0.6)               | 53 (0.9)                |         |
| <b>Female sex, n (%)</b>                           | 14014 (51.7)            | 10802 (50.4)            | 3212 (56.6)             | <0.001  |
| <b>Departement, n (%)</b>                          |                         |                         |                         |         |
| Medical departement                                | 15119 (55.8)            | 11732 (54.8)            | 3387 (59.7)             | <0.001  |
| Surgical departement                               | 11973 (44.2)            | 9684 (45.2)             | 2289 (40.3)             |         |
| <b>Hearing device, n (%)</b>                       |                         |                         |                         | <0.001  |
| None                                               | 15674 (57.9)            | 12221 (57.1)            | 3453 (60.8)             |         |
| Hearing device                                     | 2976 (11.0)             | 2319 (10.8)             | 657 (11.6)              |         |
| <i>Missing</i>                                     | <i>8442 (31.2)</i>      | <i>6876 (32.1)</i>      | <i>1566 (27.6)</i>      |         |
| <b>Visual aid, n (%)</b>                           |                         |                         |                         | <0.001  |
| None                                               | 4956 (18.3)             | 3774 (17.6)             | 1182 (20.8)             |         |
| Glasses or contacts                                | 13630 (50.3)            | 10709 (50.0)            | 2921 (51.5)             |         |
| <i>Missing</i>                                     | <i>8506 (31.4)</i>      | <i>6933 (32.4)</i>      | <i>1573 (27.7)</i>      |         |
| <b>Acute myocardial infarction, n (%)</b>          | 1442 (5.3)              | 1174 (5.5)              | 268 (4.7)               | 0.025   |
| <b>Congestive heart failure, n (%)</b>             | 4751 (17.5)             | 3420 (16.0)             | 1331 (23.4)             | <0.001  |
| <b>Peripheal vascular disease, n (%)</b>           | 3691 (13.6)             | 2851 (13.3)             | 840 (14.8)              | 0.004   |
| <b>Cerebrovascular disease, n (%)</b>              | 3462 (12.8)             | 2816 (13.1)             | 646 (11.4)              | <0.001  |
| <b>Dementia, n (%)</b>                             | 2595 (9.6)              | 1653 (7.7)              | 942 (16.6)              | <0.001  |
| <b>COPD, n (%)</b>                                 | 3041 (11.2)             | 2226 (10.4)             | 815 (14.4)              | <0.001  |
| <b>Rheumatoid disease, n (%)</b>                   | 798 (2.9)               | 549 (2.6)               | 249 (4.4)               | <0.001  |
| <b>Peptic ulcer disease, n (%)</b>                 | 542 (2.0)               | 419 (2.0)               | 123 (2.2)               | 0.34    |
| <b>Liverdisease, n (%)</b>                         | 541 (2.0)               | 431 (2.0)               | 110 (1.9)               | 0.762   |
| <b>Diabetes, n (%)</b>                             | 5692 (21.0)             | 4415 (20.6)             | 1277 (22.5)             | 0.002   |
| <b>Hemiplegia, Paraplegia, n (%)</b>               | 1232 (4.5)              | 973 (4.5)               | 259 (4.6)               | 0.978   |
| <b>Renal dysfunction, n (%)</b>                    | 6176 (22.8)             | 4679 (21.8)             | 1497 (26.4)             | <0.001  |
| <b>Cancer, n (%)</b>                               | 4625 (17.1)             | 3636 (17.0)             | 989 (17.4)              | 0.439   |
| <b>Delirium, n (%)</b>                             | 1695 (6.3)              | 1058 (4.9)              | 637 (11.2)              | <0.001  |
| <b>Self-care Index, median [IQR]</b>               | 39.00 [34.00, 40.00]    | 39.00 [35.00, 40.00]    | 36.00 [31.00, 40.00]    | <0.001  |
| <b>Braden, median [IQR]</b>                        | 22.00 [20.00, 23.00]    | 23.00 [20.00, 23.00]    | 21.00 [18.00, 23.00]    | <0.001  |
| <b>Nutrition deficiency score, median [IQR]</b>    | 1.00 [1.00, 2.00]       | 1.00 [1.00, 2.00]       | 1.00 [1.00, 2.00]       | <0.001  |
| <b>Catheterisation, n (%)</b>                      | 7873 (29.1)             | 6067 (28.3)             | 1806 (31.8)             | <0.001  |
| <b>Surgery during stay, n (%)</b>                  | 8676 (32.0)             | 7168 (33.5)             | 1508 (26.6)             | <0.001  |
| <b>GFR [ml/min], median [IQR]</b>                  | 64.00 [45.00, 80.00]    | 64.00 [45.50, 80.00]    | 62.00 [43.00, 80.00]    | 0.012   |
| <b>Creatinine [µmol/l], median [IQR]</b>           | 87.00 [70.00, 115.50]   | 87.00 [70.12, 115.00]   | 87.00 [69.00, 117.00]   | 0.098   |
| <b>Sodium [mmol/l], median [IQR]</b>               | 138.00 [135.00, 140.00] | 138.00 [135.00, 140.00] | 138.00 [135.00, 140.00] | 0.158   |
| <b>Potassium [mmol/l], median [IQR]</b>            | 4.05 [3.80, 4.35]       | 4.05 [3.80, 4.35]       | 4.10 [3.75, 4.40]       | 0.088   |
| <b>ALAT [U/l], median [IQR]</b>                    | 20.00 [14.00, 35.00]    | 20.50 [14.00, 36.00]    | 19.00 [13.00, 34.00]    | 0.005   |
| <b>ASAT [U/l], median [IQR]</b>                    | 25.00 [20.00, 35.00]    | 25.00 [20.00, 35.00]    | 25.00 [20.00, 34.00]    | 0.009   |
| <b>CRP [mg/l], median [IQR]</b>                    | 12.00 [2.70, 56.00]     | 11.00 [2.30, 55.00]     | 16.00 [3.80, 58.35]     | <0.001  |
| <b>CRP [mg/l], n (%)</b>                           |                         |                         |                         | <0.001  |
| < 5                                                | 7884 (29.1)             | 6498 (30.3)             | 1386 (24.4)             |         |
| 5-10                                               | 2680 (9.9)              | 2062 (9.6)              | 618 (10.9)              |         |
| 10-50                                              | 6070 (22.4)             | 4580 (21.4)             | 1490 (26.3)             |         |
| >50                                                | 6116 (22.6)             | 4747 (22.2)             | 1369 (24.1)             |         |
| <i>Missing</i>                                     | <i>4342 (16.0)</i>      | <i>3529 (16.5)</i>      | <i>813 (14.3)</i>       |         |
| <b>Temperature [°C], median [IQR]</b>              | 36.55 [36.25, 36.90]    | 36.55 [36.20, 36.90]    | 36.60 [36.30, 36.92]    | <0.001  |
| <b>Systolic blood pressure [mmHg], mean (±SD)</b>  | 134.14 (19.77)          | 134.41 (19.93)          | 133.15 (19.14)          | <0.001  |
| <b>Diastolic blood pressure [mmHg], mean (±SD)</b> | 71.89 (11.67)           | 72.14 (11.83)           | 71.02 (11.05)           | <0.001  |
| <b>BMI, mean (±SD)</b>                             | 26.10 (5.25)            | 26.10 (5.14)            | 26.09 (5.67)            | 0.913   |
| <b>Polymedication, mean (±SD)</b>                  | 7.58 (3.84)             | 6.77 (3.48)             | 10.24 (3.78)            | <0.001  |
| <b>ACH burden per scale, mean (±SD)</b>            | -                       | 0.46 (0.71)             | 4.98 (2.60)             | <0.001  |

| Supplementary Table S2: Table 1's binary approach  |                         |                         |                         |         |
|----------------------------------------------------|-------------------------|-------------------------|-------------------------|---------|
|                                                    | Overall                 | ATS Low <3              | ATS High ≥3             | p-value |
| <b>n</b>                                           | 27092                   | 26137                   | 955                     |         |
| <b>Died, n (%)</b>                                 | 913 (3.4)               | 821 (3.1)               | 92 (9.6)                | <0.001  |
| <b>Length of stay, median days [IQR]</b>           | 6.00 [4.00, 10.00]      | 6.00 [4.00, 10.00]      | 7.00 [5.00, 12.00]      | <0.001  |
| <b>Age, mean years (±SD)</b>                       | 78.08 (7.69)            | 77.95 (7.66)            | 81.64 (7.66)            | <0.001  |
| <b>Age, n (%)</b>                                  |                         |                         |                         | <0.001  |
| 65-75 years                                        | 10932 (40.4)            | 10721 (41.0)            | 211 (22.1)              |         |
| 76-85 years                                        | 11012 (40.6)            | 10588 (40.5)            | 424 (44.4)              |         |
| 86-95 years                                        | 4958 (18.3)             | 4656 (17.8)             | 302 (31.6)              |         |
| >95 years                                          | 190 (0.7)               | 172 (0.7)               | 18 (1.9)                |         |
| <b>Female sex, n (%)</b>                           | 14014 (51.7)            | 13453 (51.5)            | 561 (58.7)              | <0.001  |
| <b>Departement, n (%)</b>                          |                         |                         |                         |         |
| Medical departement                                | 15119 (55.8)            | 14483 (55.4)            | 636 (66.6)              | <0.001  |
| Surgical departement                               | 11973 (44.2)            | 11654 (44.6)            | 319 (33.4)              |         |
| <b>Hearing device, n (%)</b>                       |                         |                         |                         | 0.429   |
| None                                               | 15674 (57.9)            | 15128 (57.9)            | 546 (57.2)              |         |
| Hearing device                                     | 2976 (11.0)             | 2880 (11.0)             | 96 (10.1)               |         |
| <i>Missing</i>                                     | <i>8442 (31.2)</i>      | <i>8129 (31.1)</i>      | <i>313 (32.8)</i>       |         |
| <b>Visual aid, n (%)</b>                           |                         |                         |                         | <0.001  |
| None                                               | 4956 (18.3)             | 4714 (18.0)             | 242 (25.3)              |         |
| Glasses or contacts                                | 13630 (50.3)            | 13233 (50.6)            | 397 (41.6)              |         |
| <i>Missing</i>                                     | <i>8506 (31.4)</i>      | <i>8190 (31.3)</i>      | <i>316 (33.1)</i>       |         |
| <b>Acute myocardial infarction, n (%)</b>          | 1442 (5.3)              | 1399 (5.4)              | 43 (4.5)                | 0.282   |
| <b>Congestive heart failure, n (%)</b>             | 4751 (17.5)             | 4547 (17.4)             | 204 (21.4)              | 0.002   |
| <b>Peripheal vascular disease, n (%)</b>           | 3691 (13.6)             | 3563 (13.6)             | 128 (13.4)              | 0.877   |
| <b>Cerebrovascular disease, n (%)</b>              | 3462 (12.8)             | 3333 (12.8)             | 129 (13.5)              | 0.524   |
| <b>Dementia, n (%)</b>                             | 2595 (9.6)              | 2233 (8.5)              | 362 (37.9)              | <0.001  |
| <b>COPD, n (%)</b>                                 | 3041 (11.2)             | 2944 (11.3)             | 97 (10.2)               | 0.312   |
| <b>Rheumatoid disease, n (%)</b>                   | 798 (2.9)               | 779 (3.0)               | 19 (2.0)                | 0.093   |
| <b>Peptic ulcer disease, n (%)</b>                 | 542 (2.0)               | 527 (2.0)               | 15 (1.6)                | 0.396   |
| <b>Liverdisease, n (%)</b>                         | 541 (2.0)               | 519 (2.0)               | 22 (2.3)                | 0.567   |
| <b>Diabetes, n (%)</b>                             | 5692 (21.0)             | 5485 (21.0)             | 207 (21.7)              | 0.636   |
| <b>Hemiplegia, Paraplegia, n (%)</b>               | 1232 (4.5)              | 1174 (4.5)              | 58 (6.1)                | 0.026   |
| <b>Renal dysfunction, n (%)</b>                    | 6176 (22.8)             | 5904 (22.6)             | 272 (28.5)              | <0.001  |
| <b>Cancer, n (%)</b>                               | 4625 (17.1)             | 4439 (17.0)             | 186 (19.5)              | 0.049   |
| <b>Delirium, n (%)</b>                             | 1695 (6.3)              | 1446 (5.5)              | 249 (26.1)              | <0.001  |
| <b>Self-care Index, median [IQR]</b>               | 39.00 [34.00, 40.00]    | 39.00 [35.00, 40.00]    | 33.00 [25.00, 38.00]    | <0.001  |
| <b>Braden, median [IQR]</b>                        | 22.00 [20.00, 23.00]    | 22.00 [20.00, 23.00]    | 19.00 [17.00, 22.00]    | <0.001  |
| <b>Nutrition deficiency score, median [IQR]</b>    | 1.00 [1.00, 2.00]       | 1.00 [1.00, 2.00]       | 2.00 [1.00, 3.00]       | <0.001  |
| <b>Catheterisation, n (%)</b>                      | 7873 (29.1)             | 7534 (28.8)             | 339 (35.5)              | <0.001  |
| <b>Surgery during stay, n (%)</b>                  | 8676 (32.0)             | 8470 (32.4)             | 206 (21.6)              | <0.001  |
| <b>GFR [ml/min], median [IQR]</b>                  | 64.00 [45.00, 80.00]    | 64.00 [45.00, 80.00]    | 61.00 [41.75, 79.00]    | 0.028   |
| <b>Creatinine [µmol/l], median [IQR]</b>           | 87.00 [70.00, 115.50]   | 87.00 [70.00, 115.50]   | 85.00 [66.50, 118.00]   | 0.102   |
| <b>Sodium [mmol/l], median [IQR]</b>               | 138.00 [135.00, 140.00] | 138.00 [135.00, 140.00] | 137.50 [135.00, 140.00] | 0.061   |
| <b>Potassium [mmol/l], median [IQR]</b>            | 4.05 [3.80, 4.35]       | 4.05 [3.80, 4.35]       | 4.10 [3.75, 4.40]       | 0.586   |
| <b>ALAT [U/l], median [IQR]</b>                    | 20.00 [14.00, 35.00]    | 20.00 [14.00, 35.00]    | 19.25 [12.00, 30.00]    | 0.066   |
| <b>ASAT [U/l], median [IQR]</b>                    | 25.00 [20.00, 35.00]    | 25.00 [20.00, 35.00]    | 25.00 [19.00, 35.00]    | 0.482   |
| <b>CRP [mg/l], median [IQR]</b>                    | 12.00 [2.70, 56.00]     | 12.00 [2.60, 55.65]     | 19.00 [4.00, 65.00]     | <0.001  |
| <b>CRP [mg/l], n (%)</b>                           |                         |                         |                         | <0.001  |
| < 5                                                | 7884 (29.1)             | 7661 (29.3)             | 223 (23.4)              |         |
| 5-10                                               | 2680 (9.9)              | 2590 (9.9)              | 90 (9.4)                |         |
| 10-50                                              | 6070 (22.4)             | 5803 (22.2)             | 267 (28.0)              |         |
| >50                                                | 6116 (22.6)             | 5867 (22.4)             | 249 (26.1)              |         |
| <i>Missing</i>                                     | <i>4342 (16.0)</i>      | <i>4216 (16.1)</i>      | <i>126 (13.2)</i>       |         |
| <b>Temperature [°C], median [IQR]</b>              | 36.55 [36.25, 36.90]    | 36.55 [36.23, 36.90]    | 36.60 [36.30, 37.00]    | 0.002   |
| <b>Systolic blood pressure [mmHg], mean (±SD)</b>  | 134.14 (19.77)          | 134.20 (19.75)          | 132.40 (20.10)          | 0.006   |
| <b>Diastolic blood pressure [mmHg], mean (±SD)</b> | 71.89 (11.67)           | 71.94 (11.69)           | 70.71 (11.21)           | 0.002   |
| <b>BMI, mean (±SD)</b>                             | 26.10 (5.25)            | 26.13 (5.24)            | 24.79 (5.61)            | <0.001  |
| <b>Polymedication, mean (±SD)</b>                  | 7.58 (3.84)             | 7.49 (3.82)             | 9.70 (3.85)             | <0.001  |
| <b>ACH burden per scale, mean (±SD)</b>            | -                       | 0.03 (0.25)             | 6.78 (3.98)             | <0.001  |

| Supplementary Table S2: Table 1's binary approach  |                         |                         |                         |         |
|----------------------------------------------------|-------------------------|-------------------------|-------------------------|---------|
|                                                    | Overall                 | DRS Low <3              | DRS High ≥3             | p-value |
| <b>n</b>                                           | 27092                   | 21398                   | 5694                    |         |
| <b>Died, n (%)</b>                                 | 913 (3.4)               | 598 (2.8)               | 315 (5.5)               | <0.001  |
| <b>Length of stay, median days [IQR]</b>           | 6.00 [4.00, 10.00]      | 6.00 [4.00, 10.00]      | 8.00 [5.00, 12.00]      | <0.001  |
| <b>Age, mean years (±SD)</b>                       | 78.08 (7.69)            | 77.85 (7.64)            | 78.94 (7.80)            | <0.001  |
| <b>Age, n (%)</b>                                  |                         |                         |                         | <0.001  |
| 65-75 years                                        | 10932 (40.4)            | 8893 (41.6)             | 2039 (35.8)             |         |
| 76-85 years                                        | 11012 (40.6)            | 8635 (40.4)             | 2377 (41.7)             |         |
| 86-95 years                                        | 4958 (18.3)             | 3722 (17.4)             | 1236 (21.7)             |         |
| >95 years                                          | 190 (0.7)               | 148 (0.7)               | 42 (0.7)                |         |
| <b>Female sex, n (%)</b>                           | 14014 (51.7)            | 10766 (50.3)            | 3248 (57.0)             | <0.001  |
| <b>Departement, n (%)</b>                          |                         |                         |                         |         |
| Medical departement                                | 15119 (55.8)            | 11572 (54.1)            | 3547 (62.3)             | <0.001  |
| Surgical departement                               | 11973 (44.2)            | 9826 (45.9)             | 2147 (37.7)             |         |
| <b>Hearing device, n (%)</b>                       |                         |                         |                         | <0.001  |
| None                                               | 15674 (57.9)            | 12204 (57.0)            | 3470 (60.9)             |         |
| Hearing device                                     | 2976 (11.0)             | 2321 (10.8)             | 655 (11.5)              |         |
| Missing                                            | 8442 (31.2)             | 6873 (32.1)             | 1569 (27.6)             |         |
| <b>Visual aid, n (%)</b>                           |                         |                         |                         | <0.001  |
| None                                               | 4956 (18.3)             | 3763 (17.6)             | 1193 (21.0)             |         |
| Glasses or contacts                                | 13630 (50.3)            | 10708 (50.0)            | 2922 (51.3)             |         |
| Missing                                            | 8506 (31.4)             | 6927 (32.4)             | 1579 (27.7)             |         |
| <b>Acute myocardial infarction, n (%)</b>          | 1442 (5.3)              | 1167 (5.5)              | 275 (4.8)               | 0.067   |
| <b>Congestive heart failure, n (%)</b>             | 4751 (17.5)             | 3374 (15.8)             | 1377 (24.2)             | <0.001  |
| <b>Peripheal vascular disease, n (%)</b>           | 3691 (13.6)             | 2732 (12.8)             | 959 (16.8)              | <0.001  |
| <b>Cerebrovascular disease, n (%)</b>              | 3462 (12.8)             | 2795 (13.1)             | 667 (11.7)              | 0.007   |
| <b>Dementia, n (%)</b>                             | 2595 (9.6)              | 1636 (7.6)              | 959 (16.8)              | <0.001  |
| <b>COPD, n (%)</b>                                 | 3041 (11.2)             | 2179 (10.2)             | 862 (15.1)              | <0.001  |
| <b>Rheumatoid disease, n (%)</b>                   | 798 (2.9)               | 512 (2.4)               | 286 (5.0)               | <0.001  |
| <b>Peptic ulcer disease, n (%)</b>                 | 542 (2.0)               | 435 (2.0)               | 107 (1.9)               | 0.495   |
| <b>Liverdisease, n (%)</b>                         | 541 (2.0)               | 420 (2.0)               | 121 (2.1)               | 0.469   |
| <b>Diabetes, n (%)</b>                             | 5692 (21.0)             | 4067 (19.0)             | 1625 (28.5)             | <0.001  |
| <b>Hemiplegia, Paraplegia, n (%)</b>               | 1232 (4.5)              | 954 (4.5)               | 278 (4.9)               | 0.184   |
| <b>Renal dysfunction, n (%)</b>                    | 6176 (22.8)             | 4589 (21.4)             | 1587 (27.9)             | <0.001  |
| <b>Cancer, n (%)</b>                               | 4625 (17.1)             | 3740 (17.5)             | 885 (15.5)              | 0.001   |
| <b>Delirium, n (%)</b>                             | 1695 (6.3)              | 1079 (5.0)              | 616 (10.8)              | <0.001  |
| <b>Self-care Index, median [IQR]</b>               | 39.00 [34.00, 40.00]    | 39.00 [35.00, 40.00]    | 36.00 [30.00, 39.00]    | <0.001  |
| <b>Braden, median [IQR]</b>                        | 22.00 [20.00, 23.00]    | 23.00 [20.00, 23.00]    | 21.00 [18.00, 23.00]    | <0.001  |
| <b>Nutrition deficiency score, median [IQR]</b>    | 1.00 [1.00, 2.00]       | 1.00 [1.00, 1.00]       | 1.00 [1.00, 2.00]       | <0.001  |
| <b>Catheterisation, n (%)</b>                      | 7873 (29.1)             | 6240 (29.2)             | 1633 (28.7)             | 0.486   |
| <b>Surgery during stay, n (%)</b>                  | 8676 (32.0)             | 7260 (33.9)             | 1416 (24.9)             | <0.001  |
| <b>GFR [ml/min], median [IQR]</b>                  | 64.00 [45.00, 80.00]    | 64.00 [45.50, 80.50]    | 62.00 [43.00, 80.00]    | 0.008   |
| <b>Creatinine [µmol/l], median [IQR]</b>           | 87.00 [70.00, 115.50]   | 87.00 [70.00, 115.00]   | 87.00 [69.00, 117.00]   | 0.067   |
| <b>Sodium [mmol/l], median [IQR]</b>               | 138.00 [135.00, 140.00] | 138.00 [135.00, 140.00] | 138.00 [135.00, 140.00] | 0.082   |
| <b>Potassium [mmol/l], median [IQR]</b>            | 4.05 [3.80, 4.35]       | 4.05 [3.80, 4.35]       | 4.10 [3.75, 4.40]       | 0.127   |
| <b>ALAT [U/l], median [IQR]</b>                    | 20.00 [14.00, 35.00]    | 20.50 [14.00, 35.50]    | 19.00 [13.00, 35.00]    | 0.01    |
| <b>ASAT [U/l], median [IQR]</b>                    | 25.00 [20.00, 35.00]    | 25.50 [20.00, 35.00]    | 25.00 [20.00, 34.00]    | 0.001   |
| <b>CRP [mg/l], median [IQR]</b>                    | 12.00 [2.70, 56.00]     | 10.62 [2.20, 52.50]     | 18.90 [4.30, 65.00]     | <0.001  |
| <b>CRP [mg/l], n (%)</b>                           |                         |                         |                         | <0.001  |
| < 5                                                | 7884 (29.1)             | 6577 (30.7)             | 1307 (23.0)             |         |
| 5-10                                               | 2680 (9.9)              | 2068 (9.7)              | 612 (10.7)              |         |
| 10-50                                              | 6070 (22.4)             | 4551 (21.3)             | 1519 (26.7)             |         |
| >50                                                | 6116 (22.6)             | 4596 (21.5)             | 1520 (26.7)             |         |
| Missing                                            | 4342 (16.0)             | 3606 (16.9)             | 736 (12.9)              |         |
| <b>Temperature [°C], median [IQR]</b>              | 36.55 [36.25, 36.90]    | 36.55 [36.20, 36.90]    | 36.60 [36.30, 36.95]    | <0.001  |
| <b>Systolic blood pressure [mmHg], mean (±SD)</b>  | 134.14 (19.77)          | 134.49 (19.91)          | 132.88 (19.19)          | <0.001  |
| <b>Diastolic blood pressure [mmHg], mean (±SD)</b> | 71.89 (11.67)           | 72.24 (11.84)           | 70.66 (10.98)           | <0.001  |
| <b>BMI, mean (±SD)</b>                             | 26.10 (5.25)            | 26.06 (5.06)            | 26.23 (5.93)            | 0.09    |
| <b>Polymedication, mean (±SD)</b>                  | 7.58 (3.84)             | 6.67 (3.40)             | 10.55 (3.71)            | <0.001  |
| <b>ACH burden per scale, mean (±SD)</b>            | -                       | 0.53 (0.76)             | 4.86 (2.34)             | <0.001  |
