# Supplementary material for: High anticholinergic burden at admission associated with in‐hospital mortality in older patients: A comparison of 19 different anticholinergic burden scales
Source: PubMed Central journal article supplement — Basic Clin Pharmacol Toxicol. 2021 Dec 6;130(2):288–300. doi: 10.1111/bcpt.13692 (PMC9299782; doi:10.1111/bcpt.13692), 2021-12-06
Supplement: BCPT-130-288-s004.pdf [file BCPT-130-288-s004.pdf]

| Supplementary Table S3: Table 1's categorical approach |                         |                         |                         |                         |         |
|--------------------------------------------------------|-------------------------|-------------------------|-------------------------|-------------------------|---------|
|                                                        | Overall                 | ABC No Burden           | ABC Low Burden          | ABC High Burden         | p-value |
| <b>n</b>                                               | 27092                   | 25096                   | 252                     | 1744                    |         |
| <b>Died, n (%)</b>                                     | 913 (3.4)               | 781 (3.1)               | 7 (2.8)                 | 125 (7.2)               | <0.001  |
| <b>Length of stay, median days [IQR]</b>               | 6.00 [4.00, 10.00]      | 6.00 [4.00, 10.00]      | 7.00 [4.00, 10.00]      | 8.00 [6.00, 13.00]      | <0.001  |
| <b>Age, mean years (±SD)</b>                           | 78.08 (7.69)            | 77.88 (7.64)            | 77.46 (7.68)            | 81.02 (7.71)            | <0.001  |
| <b>Age, n (%)</b>                                      |                         |                         |                         |                         | <0.001  |
| 65-75 years                                            | 10932 (40.4)            | 10379 (41.4)            | 112 (44.4)              | 441 (25.3)              |         |
| 76-85 years                                            | 11012 (40.6)            | 10153 (40.5)            | 90 (35.7)               | 769 (44.1)              |         |
| 86-95 years                                            | 4958 (18.3)             | 4397 (17.5)             | 47 (18.7)               | 514 (29.5)              |         |
| >95 years                                              | 190 (0.7)               | 167 (0.7)               | 3 (1.2)                 | 20 (1.1)                |         |
| <b>Female sex, n (%)</b>                               | 14014 (51.7)            | 12930 (51.5)            | 135 (53.6)              | 949 (54.4)              | 0.055   |
| <b>Department, n (%)</b>                               |                         |                         |                         |                         |         |
| Medical department                                     | 15119 (55.8)            | 13455 (53.6)            | 218 (86.5)              | 1446 (82.9)             | <0.001  |
| Surgical department                                    | 11973 (44.2)            | 11641 (46.4)            | 34 (13.5)               | 298 (17.1)              |         |
| <b>Hearing device, n (%)</b>                           |                         |                         |                         |                         | 0.001   |
| None                                                   | 15674 (57.9)            | 14539 (57.9)            | 134 (53.2)              | 1001 (57.4)             |         |
| Hearing device                                         | 2976 (11.0)             | 2708 (10.8)             | 29 (11.5)               | 239 (13.7)              |         |
| Missing                                                | 8442 (31.2)             | 7849 (31.3)             | 89 (35.3)               | 504 (28.9)              |         |
| <b>Visual aid, n (%)</b>                               |                         |                         |                         |                         | 0.074   |
| None                                                   | 4956 (18.3)             | 4579 (18.2)             | 35 (13.9)               | 342 (19.6)              |         |
| Glasses or contacts                                    | 13630 (50.3)            | 12608 (50.2)            | 129 (51.2)              | 893 (51.2)              |         |
| Missing                                                | 8506 (31.4)             | 7909 (31.5)             | 88 (34.9)               | 509 (29.2)              |         |
| <b>Acute myocardial infarction, n (%)</b>              | 1442 (5.3)              | 1309 (5.2)              | 11 (4.4)                | 122 (7.0)               | 0.005   |
| <b>Congestive heart failure, n (%)</b>                 | 4751 (17.5)             | 3584 (14.3)             | 45 (17.9)               | 1122 (64.3)             | <0.001  |
| <b>Peripheal vascular disease, n (%)</b>               | 3691 (13.6)             | 3326 (13.3)             | 49 (19.4)               | 316 (18.1)              | <0.001  |
| <b>Cerebrovascular disease, n (%)</b>                  | 3462 (12.8)             | 3272 (13.0)             | 13 (5.2)                | 177 (10.1)              | <0.001  |
| <b>Dementia, n (%)</b>                                 | 2595 (9.6)              | 2390 (9.5)              | 13 (5.2)                | 192 (11.0)              | 0.007   |
| <b>COPD, n (%)</b>                                     | 3041 (11.2)             | 2630 (10.5)             | 78 (31.0)               | 333 (19.1)              | <0.001  |
| <b>Rheumatoid disease, n (%)</b>                       | 798 (2.9)               | 739 (2.9)               | 5 (2.0)                 | 54 (3.1)                | 0.621   |
| <b>Peptic ulcer disease, n (%)</b>                     | 542 (2.0)               | 507 (2.0)               | 4 (1.6)                 | 31 (1.8)                | 0.701   |
| <b>Liverdisease, n (%)</b>                             | 541 (2.0)               | 483 (1.9)               | 8 (3.2)                 | 50 (2.9)                | 0.01    |
| <b>Diabetes, n (%)</b>                                 | 5692 (21.0)             | 5144 (20.5)             | 44 (17.5)               | 504 (28.9)              | <0.001  |
| <b>Hemiplegia, Paraplegia, n (%)</b>                   | 1232 (4.5)              | 1159 (4.6)              | 7 (2.8)                 | 66 (3.8)                | 0.108   |
| <b>Renal dysfunction, n (%)</b>                        | 6176 (22.8)             | 5321 (21.2)             | 46 (18.3)               | 809 (46.4)              | <0.001  |
| <b>Cancer, n (%)</b>                                   | 4625 (17.1)             | 4346 (17.3)             | 55 (21.8)               | 224 (12.8)              | <0.001  |
| <b>Delirium, n (%)</b>                                 | 1695 (6.3)              | 1537 (6.1)              | 10 (4.0)                | 148 (8.5)               | <0.001  |
| <b>Self-care Index, median [IQR]</b>                   | 39.00 [34.00, 40.00]    | 39.00 [35.00, 40.00]    | 38.00 [35.00, 40.00]    | 36.00 [31.00, 39.00]    | <0.001  |
| <b>Braden, median [IQR]</b>                            | 22.00 [20.00, 23.00]    | 22.00 [20.00, 23.00]    | 21.00 [19.00, 23.00]    | 21.00 [18.00, 23.00]    | <0.001  |
| <b>Nutrition deficiency score, median [IQR]</b>        | 1.00 [1.00, 2.00]       | 1.00 [1.00, 2.00]       | 1.00 [1.00, 3.00]       | 1.00 [1.00, 2.00]       | <0.001  |
| <b>Catheterisation, n (%)</b>                          | 7873 (29.1)             | 7129 (28.4)             | 25 (9.9)                | 719 (41.2)              | <0.001  |
| <b>Surgery during stay, n (%)</b>                      | 8676 (32.0)             | 8458 (33.7)             | 22 (8.7)                | 196 (11.2)              | <0.001  |
| <b>GFR [ml/min], median [IQR]</b>                      | 64.00 [45.00, 80.00]    | 65.00 [46.00, 81.00]    | 71.00 [49.00, 84.00]    | 50.00 [33.50, 68.00]    | <0.001  |
| <b>Creatinine [µmol/l], median [IQR]</b>               | 87.00 [70.00, 115.50]   | 86.00 [70.00, 113.50]   | 82.00 [66.00, 109.00]   | 104.50 [81.00, 143.00]  | <0.001  |
| <b>Sodium [mmol/l], median [IQR]</b>                   | 138.00 [135.00, 140.00] | 138.00 [135.00, 140.00] | 136.50 [134.00, 140.00] | 138.50 [135.50, 141.00] | <0.001  |
| <b>Potassium [mmol/l], median [IQR]</b>                | 4.05 [3.80, 4.35]       | 4.05 [3.80, 4.35]       | 3.95 [3.70, 4.20]       | 4.10 [3.80, 4.45]       | <0.001  |
| <b>ALAT [U/l], median [IQR]</b>                        | 20.00 [14.00, 35.00]    | 20.00 [14.00, 35.00]    | 25.00 [15.00, 57.00]    | 21.00 [13.00, 39.00]    | 0.052   |
| <b>ASAT [U/l], median [IQR]</b>                        | 25.00 [20.00, 35.00]    | 25.00 [20.00, 35.00]    | 27.00 [21.00, 40.00]    | 27.00 [21.00, 39.00]    | <0.001  |
| <b>CRP [mg/l], median [IQR]</b>                        | 12.00 [2.70, 56.00]     | 11.50 [2.40, 55.00]     | 56.00 [18.15, 123.89]   | 16.00 [4.85, 54.98]     | <0.001  |
| <b>CRP [mg/l], n (%)</b>                               |                         |                         |                         |                         | <0.001  |
| < 5                                                    | 7884 (29.1)             | 7447 (29.7)             | 27 (10.7)               | 410 (23.5)              |         |
| 5-10                                                   | 2680 (9.9)              | 2440 (9.7)              | 13 (5.2)                | 227 (13.0)              |         |
| 10-50                                                  | 6070 (22.4)             | 5426 (21.6)             | 76 (30.2)               | 568 (32.6)              |         |
| >50                                                    | 6116 (22.6)             | 5562 (22.2)             | 124 (49.2)              | 430 (24.7)              |         |
| Missing                                                | 4342 (16.0)             | 4221 (16.8)             | 12 (4.8)                | 109 (6.2)               |         |
| <b>Temperature [°C], median [IQR]</b>                  | 36.55 [36.25, 36.90]    | 36.55 [36.23, 36.90]    | 36.85 [36.40, 37.30]    | 36.60 [36.27, 36.90]    | <0.001  |
| <b>Systolic blood pressure [mmHg], mean (±SD)</b>      | 134.14 (19.77)          | 134.49 (19.80)          | 129.02 (17.70)          | 130.08 (19.06)          | <0.001  |
| <b>Diastolic blood pressure [mmHg], mean (±SD)</b>     | 71.89 (11.67)           | 72.00 (11.68)           | 70.06 (10.46)           | 70.75 (11.73)           | <0.001  |
| <b>BMI, mean (±SD)</b>                                 | 26.10 (5.25)            | 26.03 (5.16)            | 25.46 (5.70)            | 27.03 (6.26)            | <0.001  |
| <b>Polymedication, mean (±SD)</b>                      | 7.58 (3.84)             | 7.34 (3.76)             | 10.13 (3.88)            | 10.24 (3.73)            | <0.001  |
| <b>ACH burden per scale, mean (±SD)</b>                | -                       | 0.00 (0.00)             | 2.00 (0.00)             | 4.91 (2.34)             | <0.001  |

| Supplementary Table S3: Table 1's categorical approach |                         |                         |                         |                         |         |
|--------------------------------------------------------|-------------------------|-------------------------|-------------------------|-------------------------|---------|
|                                                        | Overall                 | AEC No Burden           | AEC Low Burden          | AEC High Burden         | p-value |
| <b>n</b>                                               | 27092                   | 20728                   | 4784                    | 1580                    |         |
| <b>Died, n (%)</b>                                     | 913 (3.4)               | 611 (2.9)               | 203 (4.2)               | 99 (6.3)                | <0.001  |
| <b>Length of stay, median days [IQR]</b>               | 6.00 [4.00, 10.00]      | 6.00 [4.00, 10.00]      | 7.00 [5.00, 11.00]      | 7.00 [5.00, 11.00]      | <0.001  |
| <b>Age, mean years (±SD)</b>                           | 78.08 (7.69)            | 77.60 (7.66)            | 79.33 (7.55)            | 80.56 (7.55)            | <0.001  |
| <b>Age, n (%)</b>                                      |                         |                         |                         |                         | <0.001  |
| 65-75 years                                            | 10932 (40.4)            | 8926 (43.1)             | 1578 (33.0)             | 428 (27.1)              |         |
| 76-85 years                                            | 11012 (40.6)            | 8182 (39.5)             | 2123 (44.4)             | 707 (44.7)              |         |
| 86-95 years                                            | 4958 (18.3)             | 3489 (16.8)             | 1046 (21.9)             | 423 (26.8)              |         |
| >95 years                                              | 190 (0.7)               | 131 (0.6)               | 37 (0.8)                | 22 (1.4)                |         |
| <b>Female sex, n (%)</b>                               | 14014 (51.7)            | 10471 (50.5)            | 2673 (55.9)             | 870 (55.1)              | <0.001  |
| <b>Department, n (%)</b>                               |                         |                         |                         |                         |         |
| Medical department                                     | 15119 (55.8)            | 10726 (51.7)            | 3236 (67.6)             | 1157 (73.2)             | <0.001  |
| Surgical department                                    | 11973 (44.2)            | 10002 (48.3)            | 1548 (32.4)             | 423 (26.8)              |         |
| <b>Hearing device, n (%)</b>                           |                         |                         |                         |                         | <0.001  |
| None                                                   | 15674 (57.9)            | 11929 (57.6)            | 2822 (59.0)             | 923 (58.4)              |         |
| Hearing device                                         | 2976 (11.0)             | 2118 (10.2)             | 659 (13.8)              | 199 (12.6)              |         |
| Missing                                                | 8442 (31.2)             | 6681 (32.2)             | 1303 (27.2)             | 458 (29.0)              |         |
| <b>Visual aid, n (%)</b>                               |                         |                         |                         |                         | <0.001  |
| None                                                   | 4956 (18.3)             | 3639 (17.6)             | 937 (19.6)              | 380 (24.1)              |         |
| Glasses or contacts                                    | 13630 (50.3)            | 10351 (49.9)            | 2539 (53.1)             | 740 (46.8)              |         |
| Missing                                                | 8506 (31.4)             | 6738 (32.5)             | 1308 (27.3)             | 460 (29.1)              |         |
| <b>Acute myocardial infarction, n (%)</b>              | 1442 (5.3)              | 1119 (5.4)              | 255 (5.3)               | 68 (4.3)                | 0.174   |
| <b>Congestive heart failure, n (%)</b>                 | 4751 (17.5)             | 3189 (15.4)             | 1180 (24.7)             | 382 (24.2)              | <0.001  |
| <b>Peripheal vascular disease, n (%)</b>               | 3691 (13.6)             | 2688 (13.0)             | 784 (16.4)              | 219 (13.9)              | <0.001  |
| <b>Cerebrovascular disease, n (%)</b>                  | 3462 (12.8)             | 2678 (12.9)             | 560 (11.7)              | 224 (14.2)              | 0.018   |
| <b>Dementia, n (%)</b>                                 | 2595 (9.6)              | 1465 (7.1)              | 627 (13.1)              | 503 (31.8)              | <0.001  |
| <b>COPD, n (%)</b>                                     | 3041 (11.2)             | 1943 (9.4)              | 904 (18.9)              | 194 (12.3)              | <0.001  |
| <b>Rheumatoid disease, n (%)</b>                       | 798 (2.9)               | 335 (1.6)               | 394 (8.2)               | 69 (4.4)                | <0.001  |
| <b>Peptic ulcer disease, n (%)</b>                     | 542 (2.0)               | 409 (2.0)               | 96 (2.0)                | 37 (2.3)                | 0.601   |
| <b>Liverdisease, n (%)</b>                             | 541 (2.0)               | 424 (2.0)               | 87 (1.8)                | 30 (1.9)                | 0.575   |
| <b>Diabetes, n (%)</b>                                 | 5692 (21.0)             | 4201 (20.3)             | 1123 (23.5)             | 368 (23.3)              | <0.001  |
| <b>Hemiplegia, Paraplegia, n (%)</b>                   | 1232 (4.5)              | 941 (4.5)               | 196 (4.1)               | 95 (6.0)                | 0.007   |
| <b>Renal dysfunction, n (%)</b>                        | 6176 (22.8)             | 4175 (20.1)             | 1503 (31.4)             | 498 (31.5)              | <0.001  |
| <b>Cancer, n (%)</b>                                   | 4625 (17.1)             | 3557 (17.2)             | 809 (16.9)              | 259 (16.4)              | 0.698   |
| <b>Delirium, n (%)</b>                                 | 1695 (6.3)              | 998 (4.8)               | 369 (7.7)               | 328 (20.8)              | <0.001  |
| <b>Self-care Index, median [IQR]</b>                   | 39.00 [34.00, 40.00]    | 39.00 [35.00, 40.00]    | 37.00 [32.00, 40.00]    | 34.00 [27.00, 39.00]    | <0.001  |
| <b>Braden, median [IQR]</b>                            | 22.00 [20.00, 23.00]    | 23.00 [20.00, 23.00]    | 21.00 [19.00, 23.00]    | 20.00 [17.00, 22.00]    | <0.001  |
| <b>Nutrition deficiency score, median [IQR]</b>        | 1.00 [1.00, 2.00]       | 1.00 [1.00, 1.00]       | 1.00 [1.00, 2.00]       | 1.00 [1.00, 3.00]       | <0.001  |
| <b>Catheterisation, n (%)</b>                          | 7873 (29.1)             | 6149 (29.7)             | 1240 (25.9)             | 484 (30.6)              | <0.001  |
| <b>Surgery during stay, n (%)</b>                      | 8676 (32.0)             | 7312 (35.3)             | 1075 (22.5)             | 289 (18.3)              | <0.001  |
| <b>GFR [ml/min], median [IQR]</b>                      | 64.00 [45.00, 80.00]    | 65.00 [46.50, 81.00]    | 59.00 [40.88, 77.62]    | 59.50 [40.67, 78.00]    | <0.001  |
| <b>Creatinine [µmol/l], median [IQR]</b>               | 87.00 [70.00, 115.50]   | 86.00 [70.00, 113.00]   | 91.00 [71.50, 122.00]   | 90.50 [70.00, 120.25]   | <0.001  |
| <b>Sodium [mmol/l], median [IQR]</b>                   | 138.00 [135.00, 140.00] | 138.00 [135.00, 140.00] | 138.00 [135.00, 140.00] | 138.00 [135.00, 140.50] | 0.025   |
| <b>Potassium [mmol/l], median [IQR]</b>                | 4.05 [3.80, 4.35]       | 4.05 [3.80, 4.35]       | 4.05 [3.75, 4.40]       | 4.10 [3.70, 4.40]       | 0.449   |
| <b>ALAT [U/l], median [IQR]</b>                        | 20.00 [14.00, 35.00]    | 21.00 [14.00, 36.00]    | 19.00 [13.00, 31.00]    | 19.00 [12.00, 32.75]    | <0.001  |
| <b>ASAT [U/l], median [IQR]</b>                        | 25.00 [20.00, 35.00]    | 26.00 [20.00, 35.00]    | 25.00 [20.00, 34.00]    | 25.00 [19.00, 34.00]    | <0.001  |
| <b>CRP [mg/l], median [IQR]</b>                        | 12.00 [2.70, 56.00]     | 11.00 [2.25, 52.50]     | 16.00 [3.50, 64.91]     | 17.50 [4.00, 63.50]     | <0.001  |
| <b>CRP [mg/l], n (%)</b>                               |                         |                         |                         |                         | <0.001  |
| < 5                                                    | 7884 (29.1)             | 6253 (30.2)             | 1259 (26.3)             | 372 (23.5)              |         |
| 5-10                                                   | 2680 (9.9)              | 1997 (9.6)              | 534 (11.2)              | 149 (9.4)               |         |
| 10-50                                                  | 6070 (22.4)             | 4443 (21.4)             | 1227 (25.6)             | 400 (25.3)              |         |
| >50                                                    | 6116 (22.6)             | 4424 (21.3)             | 1300 (27.2)             | 392 (24.8)              |         |
| Missing                                                | 4342 (16.0)             | 3611 (17.4)             | 464 (9.7)               | 267 (16.9)              |         |
| <b>Temperature [°C], median [IQR]</b>                  | 36.55 [36.25, 36.90]    | 36.55 [36.20, 36.90]    | 36.60 [36.30, 36.92]    | 36.65 [36.30, 37.00]    | <0.001  |
| <b>Systolic blood pressure [mmHg], mean (±SD)</b>      | 134.14 (19.77)          | 134.96 (19.88)          | 131.87 (19.24)          | 130.91 (19.14)          | <0.001  |
| <b>Diastolic blood pressure [mmHg], mean (±SD)</b>     | 71.89 (11.67)           | 72.49 (11.82)           | 70.11 (10.95)           | 70.00 (11.25)           | <0.001  |
| <b>BMI, mean (±SD)</b>                                 | 26.10 (5.25)            | 26.20 (5.09)            | 25.81 (5.71)            | 25.63 (5.87)            | <0.001  |
| <b>Polymedication, mean (±SD)</b>                      | 7.58 (3.84)             | 6.72 (3.47)             | 9.79 (3.73)             | 10.59 (3.98)            | <0.001  |
| <b>ACH burden per scale, mean (±SD)</b>                | -                       | 0.00 (0.00)             | 1.35 (0.48)             | 4.51 (1.97)             | <0.001  |

| Supplementary Table S3: Table 1's categorical approach |                         |                         |                         |                         |         |
|--------------------------------------------------------|-------------------------|-------------------------|-------------------------|-------------------------|---------|
|                                                        | Overall                 | ACB No Burden           | ACB Low Burden          | ACB High Burden         | p-value |
| <b>n</b>                                               | 27092                   | 15993                   | 6020                    | 5079                    |         |
| <b>Died, n (%)</b>                                     | 913 (3.4)               | 411 (2.6)               | 219 (3.6)               | 283 (5.6)               | <0.001  |
| <b>Length of stay, median days [IQR]</b>               | 6.00 [4.00, 10.00]      | 6.00 [4.00, 10.00]      | 7.00 [4.00, 10.00]      | 7.00 [4.00, 11.00]      | <0.001  |
| <b>Age, mean years (±SD)</b>                           | 78.08 (7.69)            | 77.43 (7.63)            | 78.41 (7.53)            | 79.70 (7.78)            | <0.001  |
| <b>Age, n (%)</b>                                      |                         |                         |                         |                         | <0.001  |
| 65-75 years                                            | 10932 (40.4)            | 7033 (44.0)             | 2273 (37.8)             | 1626 (32.0)             |         |
| 76-85 years                                            | 11012 (40.6)            | 6284 (39.3)             | 2563 (42.6)             | 2165 (42.6)             |         |
| 86-95 years                                            | 4958 (18.3)             | 2583 (16.2)             | 1139 (18.9)             | 1236 (24.3)             |         |
| >95 years                                              | 190 (0.7)               | 93 (0.6)                | 45 (0.7)                | 52 (1.0)                |         |
| <b>Female sex, n (%)</b>                               | 14014 (51.7)            | 8029 (50.2)             | 3227 (53.6)             | 2758 (54.3)             | <0.001  |
| <b>Department, n (%)</b>                               |                         |                         |                         |                         |         |
| Medical department                                     | 15119 (55.8)            | 8487 (53.1)             | 3521 (58.5)             | 3111 (61.3)             | <0.001  |
| Surgical department                                    | 11973 (44.2)            | 7506 (46.9)             | 2499 (41.5)             | 1968 (38.7)             |         |
| <b>Hearing device, n (%)</b>                           |                         |                         |                         |                         | <0.001  |
| None                                                   | 15674 (57.9)            | 8971 (56.1)             | 3659 (60.8)             | 3044 (59.9)             |         |
| Hearing device                                         | 2976 (11.0)             | 1638 (10.2)             | 721 (12.0)              | 617 (12.1)              |         |
| <i>Missing</i>                                         | <i>8442 (31.2)</i>      | <i>5384 (33.7)</i>      | <i>1640 (27.2)</i>      | <i>1418 (27.9)</i>      |         |
| <b>Visual aid, n (%)</b>                               |                         |                         |                         |                         | <0.001  |
| None                                                   | 4956 (18.3)             | 2694 (16.8)             | 1191 (19.8)             | 1071 (21.1)             |         |
| Glasses or contacts                                    | 13630 (50.3)            | 7873 (49.2)             | 3169 (52.6)             | 2588 (51.0)             |         |
| <i>Missing</i>                                         | <i>8506 (31.4)</i>      | <i>5426 (33.9)</i>      | <i>1660 (27.6)</i>      | <i>1420 (28.0)</i>      |         |
| <b>Acute myocardial infarction, n (%)</b>              | 1442 (5.3)              | 793 (5.0)               | 390 (6.5)               | 259 (5.1)               | <0.001  |
| <b>Congestive heart failure, n (%)</b>                 | 4751 (17.5)             | 2140 (13.4)             | 1352 (22.5)             | 1259 (24.8)             | <0.001  |
| <b>Peripheal vascular disease, n (%)</b>               | 3691 (13.6)             | 1973 (12.3)             | 969 (16.1)              | 749 (14.7)              | <0.001  |
| <b>Cerebrovascular disease, n (%)</b>                  | 3462 (12.8)             | 2229 (13.9)             | 632 (10.5)              | 601 (11.8)              | <0.001  |
| <b>Dementia, n (%)</b>                                 | 2595 (9.6)              | 1155 (7.2)              | 438 (7.3)               | 1002 (19.7)             | <0.001  |
| <b>COPD, n (%)</b>                                     | 3041 (11.2)             | 1497 (9.4)              | 893 (14.8)              | 651 (12.8)              | <0.001  |
| <b>Rheumatoid disease, n (%)</b>                       | 798 (2.9)               | 274 (1.7)               | 328 (5.4)               | 196 (3.9)               | <0.001  |
| <b>Peptic ulcer disease, n (%)</b>                     | 542 (2.0)               | 336 (2.1)               | 112 (1.9)               | 94 (1.9)                | 0.367   |
| <b>Liverdisease, n (%)</b>                             | 541 (2.0)               | 346 (2.2)               | 115 (1.9)               | 80 (1.6)                | 0.029   |
| <b>Diabetes, n (%)</b>                                 | 5692 (21.0)             | 3117 (19.5)             | 1394 (23.2)             | 1181 (23.3)             | <0.001  |
| <b>Hemiplegia, Paraplegia, n (%)</b>                   | 1232 (4.5)              | 803 (5.0)               | 189 (3.1)               | 240 (4.7)               | <0.001  |
| <b>Renal dysfunction, n (%)</b>                        | 6176 (22.8)             | 3141 (19.6)             | 1582 (26.3)             | 1453 (28.6)             | <0.001  |
| <b>Cancer, n (%)</b>                                   | 4625 (17.1)             | 2806 (17.5)             | 992 (16.5)              | 827 (16.3)              | 0.044   |
| <b>Delirium, n (%)</b>                                 | 1695 (6.3)              | 768 (4.8)               | 258 (4.3)               | 669 (13.2)              | <0.001  |
| <b>Self-care Index, median [IQR]</b>                   | 39.00 [34.00, 40.00]    | 39.00 [36.00, 40.00]    | 39.00 [34.00, 40.00]    | 36.00 [31.00, 40.00]    | <0.001  |
| <b>Braden, median [IQR]</b>                            | 22.00 [20.00, 23.00]    | 23.00 [20.00, 23.00]    | 22.00 [20.00, 23.00]    | 21.00 [18.00, 23.00]    | <0.001  |
| <b>Nutrition deficiency score, median [IQR]</b>        | 1.00 [1.00, 2.00]       | 1.00 [1.00, 1.00]       | 1.00 [1.00, 2.00]       | 1.00 [1.00, 2.00]       | <0.001  |
| <b>Catheterisation, n (%)</b>                          | 7873 (29.1)             | 4560 (28.5)             | 1568 (26.0)             | 1745 (34.4)             | <0.001  |
| <b>Surgery during stay, n (%)</b>                      | 8676 (32.0)             | 5535 (34.6)             | 1766 (29.3)             | 1375 (27.1)             | <0.001  |
| <b>GFR [ml/min], median [IQR]</b>                      | 64.00 [45.00, 80.00]    | 66.00 [47.00, 81.00]    | 61.00 [43.00, 79.00]    | 60.00 [41.00, 78.00]    | <0.001  |
| <b>Creatinine [µmol/l], median [IQR]</b>               | 87.00 [70.00, 115.50]   | 86.00 [70.00, 112.00]   | 89.33 [71.00, 120.00]   | 90.00 [71.00, 120.00]   | <0.001  |
| <b>Sodium [mmol/l], median [IQR]</b>                   | 138.00 [135.00, 140.00] | 138.00 [135.00, 140.00] | 138.00 [135.00, 140.00] | 138.00 [135.00, 140.00] | 0.002   |
| <b>Potassium [mmol/l], median [IQR]</b>                | 4.05 [3.80, 4.35]       | 4.03 [3.80, 4.30]       | 4.10 [3.80, 4.40]       | 4.10 [3.80, 4.40]       | 0.001   |
| <b>ALAT [U/l], median [IQR]</b>                        | 20.00 [14.00, 35.00]    | 21.00 [14.00, 37.00]    | 20.00 [14.00, 34.00]    | 19.00 [13.00, 33.00]    | <0.001  |
| <b>ASAT [U/l], median [IQR]</b>                        | 25.00 [20.00, 35.00]    | 25.00 [20.00, 35.00]    | 25.00 [20.00, 35.00]    | 25.00 [20.00, 34.00]    | 0.01    |
| <b>CRP [mg/l], median [IQR]</b>                        | 12.00 [2.70, 56.00]     | 10.30 [2.00, 53.00]     | 14.40 [3.00, 60.12]     | 15.00 [3.60, 57.50]     | <0.001  |
| <b>CRP [mg/l], n (%)</b>                               |                         |                         |                         |                         | <0.001  |
| < 5                                                    | 7884 (29.1)             | 5031 (31.5)             | 1612 (26.8)             | 1241 (24.4)             |         |
| 5-10                                                   | 2680 (9.9)              | 1504 (9.4)              | 638 (10.6)              | 538 (10.6)              |         |
| 10-50                                                  | 6070 (22.4)             | 3333 (20.8)             | 1438 (23.9)             | 1299 (25.6)             |         |
| >50                                                    | 6116 (22.6)             | 3475 (21.7)             | 1464 (24.3)             | 1177 (23.2)             |         |
| <i>Missing</i>                                         | <i>4342 (16.0)</i>      | <i>2650 (16.6)</i>      | <i>868 (14.4)</i>       | <i>824 (16.2)</i>       |         |
| <b>Temperature [°C], median [IQR]</b>                  | 36.55 [36.25, 36.90]    | 36.55 [36.20, 36.90]    | 36.56 [36.25, 36.90]    | 36.60 [36.30, 36.95]    | <0.001  |
| <b>Systolic blood pressure [mmHg], mean (±SD)</b>      | 134.14 (19.77)          | 134.84 (20.01)          | 133.31 (19.49)          | 133.07 (19.28)          | <0.001  |
| <b>Diastolic blood pressure [mmHg], mean (±SD)</b>     | 71.89 (11.67)           | 72.62 (12.01)           | 70.85 (11.14)           | 71.01 (11.13)           | <0.001  |
| <b>BMI, mean (±SD)</b>                                 | 26.10 (5.25)            | 25.97 (5.06)            | 26.40 (5.39)            | 26.12 (5.64)            | <0.001  |
| <b>Polymedication, mean (±SD)</b>                      | 7.58 (3.84)             | 6.15 (3.36)             | 8.78 (3.48)             | 9.87 (3.83)             | <0.001  |
| <b>ACH burden per scale, mean (±SD)</b>                | -                       | 0.00 (0.00)             | 1.32 (0.47)             | 4.89 (2.79)             | <0.001  |

| Supplementary Table S3: Table 1's categorical approach |                         |                         |                         |                         |         |
|--------------------------------------------------------|-------------------------|-------------------------|-------------------------|-------------------------|---------|
|                                                        | Overall                 | AIS No Burden           | AIS Low Burden          | AIS High Burden         | p-value |
| <b>n</b>                                               | 27092                   | 11532                   | 7811                    | 7749                    |         |
| <b>Died, n (%)</b>                                     | 913 (3.4)               | 295 (2.6)               | 212 (2.7)               | 406 (5.2)               | <0.001  |
| <b>Length of stay, median days [IQR]</b>               | 6.00 [4.00, 10.00]      | 6.00 [4.00, 10.00]      | 6.00 [4.00, 10.00]      | 7.00 [5.00, 11.00]      | <0.001  |
| <b>Age, mean years (±SD)</b>                           | 78.08 (7.69)            | 77.62 (7.62)            | 77.95 (7.66)            | 78.89 (7.74)            | <0.001  |
| <b>Age, n (%)</b>                                      |                         |                         |                         |                         | <0.001  |
| 65-75 years                                            | 10932 (40.4)            | 4954 (43.0)             | 3192 (40.9)             | 2786 (36.0)             |         |
| 76-85 years                                            | 11012 (40.6)            | 4597 (39.9)             | 3180 (40.7)             | 3235 (41.7)             |         |
| 86-95 years                                            | 4958 (18.3)             | 1912 (16.6)             | 1386 (17.7)             | 1660 (21.4)             |         |
| >95 years                                              | 190 (0.7)               | 69 (0.6)                | 53 (0.7)                | 68 (0.9)                |         |
| <b>Female sex, n (%)</b>                               | 14014 (51.7)            | 5476 (47.5)             | 4287 (54.9)             | 4251 (54.9)             | <0.001  |
| <b>Department, n (%)</b>                               |                         |                         |                         |                         |         |
| Medical department                                     | 15119 (55.8)            | 6490 (56.3)             | 3729 (47.7)             | 4900 (63.2)             | <0.001  |
| Surgical department                                    | 11973 (44.2)            | 5042 (43.7)             | 4082 (52.3)             | 2849 (36.8)             |         |
| <b>Hearing device, n (%)</b>                           |                         |                         |                         |                         | <0.001  |
| None                                                   | 15674 (57.9)            | 6193 (53.7)             | 4792 (61.3)             | 4689 (60.5)             |         |
| Hearing device                                         | 2976 (11.0)             | 1128 (9.8)              | 950 (12.2)              | 898 (11.6)              |         |
| Missing                                                | 8442 (31.2)             | 4211 (36.5)             | 2069 (26.5)             | 2162 (27.9)             |         |
| <b>Visual aid, n (%)</b>                               |                         |                         |                         |                         | <0.001  |
| None                                                   | 4956 (18.3)             | 1926 (16.7)             | 1428 (18.3)             | 1602 (20.7)             |         |
| Glasses or contacts                                    | 13630 (50.3)            | 5366 (46.5)             | 4286 (54.9)             | 3978 (51.3)             |         |
| Missing                                                | 8506 (31.4)             | 4240 (36.8)             | 2097 (26.8)             | 2169 (28.0)             |         |
| <b>Acute myocardial infarction, n (%)</b>              | 1442 (5.3)              | 679 (5.9)               | 384 (4.9)               | 379 (4.9)               | 0.002   |
| <b>Congestive heart failure, n (%)</b>                 | 4751 (17.5)             | 1845 (16.0)             | 1228 (15.7)             | 1678 (21.7)             | <0.001  |
| <b>Peripheal vascular disease, n (%)</b>               | 3691 (13.6)             | 1422 (12.3)             | 1081 (13.8)             | 1188 (15.3)             | <0.001  |
| <b>Cerebrovascular disease, n (%)</b>                  | 3462 (12.8)             | 1824 (15.8)             | 793 (10.2)              | 845 (10.9)              | <0.001  |
| <b>Dementia, n (%)</b>                                 | 2595 (9.6)              | 875 (7.6)               | 619 (7.9)               | 1101 (14.2)             | <0.001  |
| <b>COPD, n (%)</b>                                     | 3041 (11.2)             | 913 (7.9)               | 674 (8.6)               | 1454 (18.8)             | <0.001  |
| <b>Rheumatoid disease, n (%)</b>                       | 798 (2.9)               | 181 (1.6)               | 279 (3.6)               | 338 (4.4)               | <0.001  |
| <b>Peptic ulcer disease, n (%)</b>                     | 542 (2.0)               | 246 (2.1)               | 133 (1.7)               | 163 (2.1)               | 0.083   |
| <b>Liverdisease, n (%)</b>                             | 541 (2.0)               | 242 (2.1)               | 164 (2.1)               | 135 (1.7)               | 0.165   |
| <b>Diabetes, n (%)</b>                                 | 5692 (21.0)             | 2332 (20.2)             | 1597 (20.4)             | 1763 (22.8)             | <0.001  |
| <b>Hemiplegia, Paraplegia, n (%)</b>                   | 1232 (4.5)              | 644 (5.6)               | 246 (3.1)               | 342 (4.4)               | <0.001  |
| <b>Renal dysfunction, n (%)</b>                        | 6176 (22.8)             | 2388 (20.7)             | 1708 (21.9)             | 2080 (26.8)             | <0.001  |
| <b>Cancer, n (%)</b>                                   | 4625 (17.1)             | 1852 (16.1)             | 1422 (18.2)             | 1351 (17.4)             | <0.001  |
| <b>Delirium, n (%)</b>                                 | 1695 (6.3)              | 613 (5.3)               | 337 (4.3)               | 745 (9.6)               | <0.001  |
| <b>Self-care Index, median [IQR]</b>                   | 39.00 [34.00, 40.00]    | 40.00 [36.00, 40.00]    | 39.00 [35.00, 40.00]    | 36.00 [31.00, 40.00]    | <0.001  |
| <b>Braden, median [IQR]</b>                            | 22.00 [20.00, 23.00]    | 23.00 [21.00, 23.00]    | 22.00 [20.00, 23.00]    | 21.00 [18.00, 23.00]    | <0.001  |
| <b>Nutrition deficiency score, median [IQR]</b>        | 1.00 [1.00, 2.00]       | 1.00 [1.00, 1.00]       | 1.00 [1.00, 2.00]       | 1.00 [1.00, 2.00]       | <0.001  |
| <b>Catheterisation, n (%)</b>                          | 7873 (29.1)             | 3475 (30.1)             | 2200 (28.2)             | 2198 (28.4)             | 0.004   |
| <b>Surgery during stay, n (%)</b>                      | 8676 (32.0)             | 3839 (33.3)             | 2988 (38.3)             | 1849 (23.9)             | <0.001  |
| <b>GFR [ml/min], median [IQR]</b>                      | 64.00 [45.00, 80.00]    | 65.00 [46.00, 80.50]    | 63.00 [45.00, 80.00]    | 62.50 [44.00, 80.00]    | 0.015   |
| <b>Creatinine [µmol/l], median [IQR]</b>               | 87.00 [70.00, 115.50]   | 87.50 [71.00, 115.50]   | 86.00 [69.50, 114.00]   | 87.00 [69.00, 117.00]   | 0.022   |
| <b>Sodium [mmol/l], median [IQR]</b>                   | 138.00 [135.00, 140.00] | 138.00 [136.00, 140.00] | 138.00 [135.00, 140.00] | 138.00 [135.00, 140.00] | <0.001  |
| <b>Potassium [mmol/l], median [IQR]</b>                | 4.05 [3.80, 4.35]       | 4.05 [3.80, 4.30]       | 4.05 [3.75, 4.35]       | 4.05 [3.75, 4.40]       | 0.913   |
| <b>ALAT [U/l], median [IQR]</b>                        | 20.00 [14.00, 35.00]    | 21.00 [14.00, 37.62]    | 20.00 [14.00, 34.00]    | 20.00 [13.00, 34.00]    | 0.009   |
| <b>ASAT [U/l], median [IQR]</b>                        | 25.00 [20.00, 35.00]    | 26.00 [20.00, 36.00]    | 25.00 [20.00, 34.00]    | 25.00 [20.00, 35.00]    | 0.01    |
| <b>CRP [mg/l], median [IQR]</b>                        | 12.00 [2.70, 56.00]     | 9.00 [2.00, 47.00]      | 10.60 [2.40, 49.70]     | 21.00 [4.40, 72.00]     | <0.001  |
| <b>CRP [mg/l], n (%)</b>                               |                         |                         |                         |                         | <0.001  |
| < 5                                                    | 7884 (29.1)             | 3898 (33.8)             | 2219 (28.4)             | 1767 (22.8)             |         |
| 5-10                                                   | 2680 (9.9)              | 1107 (9.6)              | 800 (10.2)              | 773 (10.0)              |         |
| 10-50                                                  | 6070 (22.4)             | 2372 (20.6)             | 1683 (21.5)             | 2015 (26.0)             |         |
| >50                                                    | 6116 (22.6)             | 2305 (20.0)             | 1547 (19.8)             | 2264 (29.2)             |         |
| Missing                                                | 4342 (16.0)             | 1850 (16.0)             | 1562 (20.0)             | 930 (12.0)              |         |
| <b>Temperature [°C], median [IQR]</b>                  | 36.55 [36.25, 36.90]    | 36.50 [36.20, 36.90]    | 36.50 [36.20, 36.85]    | 36.60 [36.30, 37.00]    | <0.001  |
| <b>Systolic blood pressure [mmHg], mean (±SD)</b>      | 134.14 (19.77)          | 135.25 (20.54)          | 134.18 (18.95)          | 132.61 (19.43)          | <0.001  |
| <b>Diastolic blood pressure [mmHg], mean (±SD)</b>     | 71.89 (11.67)           | 73.09 (12.48)           | 71.70 (11.05)           | 70.51 (11.00)           | <0.001  |
| <b>BMI, mean (±SD)</b>                                 | 26.10 (5.25)            | 26.14 (5.00)            | 26.15 (5.15)            | 25.98 (5.69)            | 0.168   |
| <b>Polymedication, mean (±SD)</b>                      | 7.58 (3.84)             | 5.40 (3.00)             | 7.51 (3.24)             | 10.11 (3.72)            | <0.001  |
| <b>ACH burden per scale, mean (±SD)</b>                | -                       | 0.00 (0.00)             | 1.41 (0.49)             | 6.09 (3.58)             | <0.001  |

| Supplementary Table S3: Table 1's categorical approach |                         |                         |                         |                         |         |
|--------------------------------------------------------|-------------------------|-------------------------|-------------------------|-------------------------|---------|
|                                                        | Overall                 | CABS No Burden          | CABS Low Burden         | CABS High Burden        | p-value |
| <b>n</b>                                               | 27092                   | 23444                   | 1376                    | 2272                    |         |
| <b>Died, n (%)</b>                                     | 913 (3.4)               | 679 (2.9)               | 91 (6.6)                | 143 (6.3)               | <0.001  |
| <b>Length of stay, median days [IQR]</b>               | 6.00 [4.00, 10.00]      | 6.00 [4.00, 10.00]      | 7.50 [5.00, 12.00]      | 8.00 [5.00, 12.00]      | <0.001  |
| <b>Age, mean years (±SD)</b>                           | 78.08 (7.69)            | 77.76 (7.62)            | 80.01 (7.78)            | 80.13 (7.81)            | <0.001  |
| <b>Age, n (%)</b>                                      |                         |                         |                         |                         | <0.001  |
| 65-75 years                                            | 10932 (40.4)            | 9840 (42.0)             | 420 (30.5)              | 672 (29.6)              |         |
| 76-85 years                                            | 11012 (40.6)            | 9435 (40.2)             | 596 (43.3)              | 981 (43.2)              |         |
| 86-95 years                                            | 4958 (18.3)             | 4018 (17.1)             | 344 (25.0)              | 596 (26.2)              |         |
| >95 years                                              | 190 (0.7)               | 151 (0.6)               | 16 (1.2)                | 23 (1.0)                |         |
| <b>Female sex, n (%)</b>                               | 14014 (51.7)            | 12115 (51.7)            | 735 (53.4)              | 1164 (51.2)             | 0.403   |
| <b>Department, n (%)</b>                               |                         |                         |                         |                         |         |
| Medical department                                     | 15119 (55.8)            | 12137 (51.8)            | 932 (67.7)              | 2050 (90.2)             | <0.001  |
| Surgical department                                    | 11973 (44.2)            | 11307 (48.2)            | 444 (32.2)              | 222 (9.8)               |         |
| <b>Hearing device, n (%)</b>                           |                         |                         |                         |                         | 0.01    |
| None                                                   | 15674 (57.9)            | 13618 (58.1)            | 775 (56.3)              | 1281 (56.4)             |         |
| Hearing device                                         | 2976 (11.0)             | 2513 (10.7)             | 169 (12.3)              | 294 (12.9)              |         |
| Missing                                                | 8442 (31.2)             | 7313 (31.2)             | 432 (31.4)              | 697 (30.7)              |         |
| <b>Visual aid, n (%)</b>                               |                         |                         |                         |                         | 0.001   |
| None                                                   | 4956 (18.3)             | 4199 (17.9)             | 271 (19.7)              | 486 (21.4)              |         |
| Glasses or contacts                                    | 13630 (50.3)            | 11878 (50.7)            | 670 (48.7)              | 1082 (47.6)             |         |
| Missing                                                | 8506 (31.4)             | 7367 (31.4)             | 435 (31.6)              | 704 (31.0)              |         |
| <b>Acute myocardial infarction, n (%)</b>              | 1442 (5.3)              | 1221 (5.2)              | 89 (6.5)                | 132 (5.8)               | 0.072   |
| <b>Congestive heart failure, n (%)</b>                 | 4751 (17.5)             | 3122 (13.3)             | 509 (37.0)              | 1120 (49.3)             | <0.001  |
| <b>Peripheal vascular disease, n (%)</b>               | 3691 (13.6)             | 3098 (13.2)             | 227 (16.5)              | 366 (16.1)              | <0.001  |
| <b>Cerebrovascular disease, n (%)</b>                  | 3462 (12.8)             | 3086 (13.2)             | 159 (11.6)              | 217 (9.6)               | <0.001  |
| <b>Dementia, n (%)</b>                                 | 2595 (9.6)              | 2213 (9.4)              | 144 (10.5)              | 238 (10.5)              | 0.144   |
| <b>COPD, n (%)</b>                                     | 3041 (11.2)             | 1898 (8.1)              | 282 (20.5)              | 861 (37.9)              | <0.001  |
| <b>Rheumatoid disease, n (%)</b>                       | 798 (2.9)               | 668 (2.8)               | 55 (4.0)                | 75 (3.3)                | 0.029   |
| <b>Peptic ulcer disease, n (%)</b>                     | 542 (2.0)               | 477 (2.0)               | 27 (2.0)                | 38 (1.7)                | 0.498   |
| <b>Liverdisease, n (%)</b>                             | 541 (2.0)               | 458 (2.0)               | 38 (2.8)                | 45 (2.0)                | 0.114   |
| <b>Diabetes, n (%)</b>                                 | 5692 (21.0)             | 4729 (20.2)             | 363 (26.4)              | 600 (26.4)              | <0.001  |
| <b>Hemiplegia, Paraplegia, n (%)</b>                   | 1232 (4.5)              | 1084 (4.6)              | 54 (3.9)                | 94 (4.1)                | 0.297   |
| <b>Renal dysfunction, n (%)</b>                        | 6176 (22.8)             | 4839 (20.6)             | 466 (33.9)              | 871 (38.3)              | <0.001  |
| <b>Cancer, n (%)</b>                                   | 4625 (17.1)             | 4157 (17.7)             | 227 (16.5)              | 241 (10.6)              | <0.001  |
| <b>Delirium, n (%)</b>                                 | 1695 (6.3)              | 1427 (6.1)              | 108 (7.8)               | 160 (7.0)               | 0.009   |
| <b>Self-care Index, median [IQR]</b>                   | 39.00 [34.00, 40.00]    | 39.00 [35.00, 40.00]    | 38.00 [33.00, 40.00]    | 35.00 [30.00, 39.00]    | <0.001  |
| <b>Braden, median [IQR]</b>                            | 22.00 [20.00, 23.00]    | 22.00 [20.00, 23.00]    | 21.00 [19.00, 23.00]    | 21.00 [18.00, 23.00]    | <0.001  |
| <b>Nutrition deficiency score, median [IQR]</b>        | 1.00 [1.00, 2.00]       | 1.00 [1.00, 2.00]       | 1.00 [1.00, 2.00]       | 1.00 [1.00, 2.00]       | <0.001  |
| <b>Catheterisation, n (%)</b>                          | 7873 (29.1)             | 6744 (28.8)             | 416 (30.2)              | 713 (31.4)              | 0.02    |
| <b>Surgery during stay, n (%)</b>                      | 8676 (32.0)             | 8242 (35.2)             | 283 (20.6)              | 151 (6.6)               | <0.001  |
| <b>GFR [ml/min], median [IQR]</b>                      | 64.00 [45.00, 80.00]    | 65.00 [46.00, 81.00]    | 56.75 [38.00, 76.00]    | 57.00 [39.00, 76.00]    | <0.001  |
| <b>Creatinine [µmol/l], median [IQR]</b>               | 87.00 [70.00, 115.50]   | 86.00 [70.00, 113.00]   | 93.00 [73.50, 131.00]   | 95.25 [73.50, 127.00]   | <0.001  |
| <b>Sodium [mmol/l], median [IQR]</b>                   | 138.00 [135.00, 140.00] | 138.00 [135.00, 140.00] | 138.00 [135.00, 140.00] | 138.00 [135.00, 140.50] | 0.031   |
| <b>Potassium [mmol/l], median [IQR]</b>                | 4.05 [3.80, 4.35]       | 4.05 [3.80, 4.35]       | 4.05 [3.70, 4.40]       | 4.10 [3.75, 4.40]       | 0.195   |
| <b>ALAT [U/l], median [IQR]</b>                        | 20.00 [14.00, 35.00]    | 20.00 [14.00, 35.00]    | 20.00 [13.00, 38.00]    | 21.00 [13.00, 35.00]    | 0.931   |
| <b>ASAT [U/l], median [IQR]</b>                        | 25.00 [20.00, 35.00]    | 25.00 [20.00, 35.00]    | 27.00 [20.00, 37.00]    | 26.00 [20.88, 36.00]    | <0.001  |
| <b>CRP [mg/l], median [IQR]</b>                        | 12.00 [2.70, 56.00]     | 10.40 [2.20, 51.50]     | 17.70 [4.00, 68.06]     | 30.00 [8.11, 81.00]     | <0.001  |
| <b>CRP [mg/l], n (%)</b>                               |                         |                         |                         |                         | <0.001  |
| < 5                                                    | 7884 (29.1)             | 7160 (30.5)             | 350 (25.4)              | 374 (16.5)              |         |
| 5-10                                                   | 2680 (9.9)              | 2279 (9.7)              | 160 (11.6)              | 241 (10.6)              |         |
| 10-50                                                  | 6070 (22.4)             | 4947 (21.1)             | 366 (26.6)              | 757 (33.3)              |         |
| >50                                                    | 6116 (22.6)             | 4906 (20.9)             | 396 (28.8)              | 814 (35.8)              |         |
| Missing                                                | 4342 (16.0)             | 4152 (17.7)             | 104 (7.6)               | 86 (3.8)                |         |
| <b>Temperature [°C], median [IQR]</b>                  | 36.55 [36.25, 36.90]    | 36.55 [36.20, 36.90]    | 36.60 [36.30, 36.93]    | 36.70 [36.33, 37.10]    | <0.001  |
| <b>Systolic blood pressure [mmHg], mean (±SD)</b>      | 134.14 (19.77)          | 134.55 (19.62)          | 134.01 (22.48)          | 130.14 (18.93)          | <0.001  |
| <b>Diastolic blood pressure [mmHg], mean (±SD)</b>     | 71.89 (11.67)           | 72.09 (11.70)           | 71.20 (12.16)           | 70.34 (11.01)           | <0.001  |
| <b>BMI, mean (±SD)</b>                                 | 26.10 (5.25)            | 26.06 (5.13)            | 26.26 (5.63)            | 26.42 (6.14)            | 0.025   |
| <b>Polymedication, mean (±SD)</b>                      | 7.58 (3.84)             | 7.13 (3.66)             | 9.38 (3.83)             | 10.52 (3.86)            | <0.001  |
| <b>ACH burden per scale, mean (±SD)</b>                | -                       | 0.00 (0.00)             | 2.00 (0.00)             | 5.48 (2.09)             | <0.001  |

| Supplementary Table S3: Table 1's categorical approach |                         |                         |                         |                         |         |
|--------------------------------------------------------|-------------------------|-------------------------|-------------------------|-------------------------|---------|
|                                                        | Overall                 | Chew No Burden          | Chew Low Burden         | Chew High Burden        | p-value |
| <b>n</b>                                               | 27092                   | 18548                   | 5986                    | 2558                    |         |
| <b>Died, n (%)</b>                                     | 913 (3.4)               | 535 (2.9)               | 233 (3.9)               | 145 (5.7)               | <0.001  |
| <b>Length of stay, median days [IQR]</b>               | 6.00 [4.00, 10.00]      | 6.00 [4.00, 9.00]       | 7.00 [4.00, 11.00]      | 8.00 [5.00, 13.00]      | <0.001  |
| <b>Age, mean years (±SD)</b>                           | 78.08 (7.69)            | 77.52 (7.60)            | 79.19 (7.75)            | 79.49 (7.66)            | <0.001  |
| <b>Age, n (%)</b>                                      |                         |                         |                         |                         | <0.001  |
| 65-75 years                                            | 10932 (40.4)            | 8026 (43.3)             | 2084 (34.8)             | 822 (32.1)              |         |
| 76-85 years                                            | 11012 (40.6)            | 7370 (39.7)             | 2528 (42.2)             | 1114 (43.5)             |         |
| 86-95 years                                            | 4958 (18.3)             | 3037 (16.4)             | 1319 (22.0)             | 602 (23.5)              |         |
| >95 years                                              | 190 (0.7)               | 115 (0.6)               | 55 (0.9)                | 20 (0.8)                |         |
| <b>Female sex, n (%)</b>                               | 14014 (51.7)            | 9437 (50.9)             | 3153 (52.7)             | 1424 (55.7)             | <0.001  |
| <b>Department, n (%)</b>                               |                         |                         |                         |                         |         |
| Medical department                                     | 15119 (55.8)            | 9656 (52.1)             | 3762 (62.8)             | 1701 (66.5)             | <0.001  |
| Surgical department                                    | 11973 (44.2)            | 8892 (47.9)             | 2224 (37.2)             | 857 (33.5)              |         |
| <b>Hearing device, n (%)</b>                           |                         |                         |                         |                         | <0.001  |
| None                                                   | 15674 (57.9)            | 10565 (57.0)            | 3562 (59.5)             | 1547 (60.5)             |         |
| Hearing device                                         | 2976 (11.0)             | 1933 (10.4)             | 749 (12.5)              | 294 (11.5)              |         |
| Missing                                                | 8442 (31.2)             | 6050 (32.6)             | 1675 (28.0)             | 717 (28.0)              |         |
| <b>Visual aid, n (%)</b>                               |                         |                         |                         |                         | <0.001  |
| None                                                   | 4956 (18.3)             | 3228 (17.4)             | 1207 (20.2)             | 521 (20.4)              |         |
| Glasses or contacts                                    | 13630 (50.3)            | 9223 (49.7)             | 3096 (51.7)             | 1311 (51.3)             |         |
| Missing                                                | 8506 (31.4)             | 6097 (32.9)             | 1683 (28.1)             | 726 (28.4)              |         |
| <b>Acute myocardial infarction, n (%)</b>              | 1442 (5.3)              | 1006 (5.4)              | 318 (5.3)               | 118 (4.6)               | 0.231   |
| <b>Congestive heart failure, n (%)</b>                 | 4751 (17.5)             | 2526 (13.6)             | 1472 (24.6)             | 753 (29.4)              | <0.001  |
| <b>Peripheal vascular disease, n (%)</b>               | 3691 (13.6)             | 2281 (12.3)             | 945 (15.8)              | 465 (18.2)              | <0.001  |
| <b>Cerebrovascular disease, n (%)</b>                  | 3462 (12.8)             | 2409 (13.0)             | 727 (12.1)              | 326 (12.7)              | 0.236   |
| <b>Dementia, n (%)</b>                                 | 2595 (9.6)              | 1228 (6.6)              | 867 (14.5)              | 500 (19.5)              | <0.001  |
| <b>COPD, n (%)</b>                                     | 3041 (11.2)             | 1877 (10.1)             | 819 (13.7)              | 345 (13.5)              | <0.001  |
| <b>Rheumatoid disease, n (%)</b>                       | 798 (2.9)               | 488 (2.6)               | 180 (3.0)               | 130 (5.1)               | <0.001  |
| <b>Peptic ulcer disease, n (%)</b>                     | 542 (2.0)               | 386 (2.1)               | 100 (1.7)               | 56 (2.2)                | 0.111   |
| <b>Liverdisease, n (%)</b>                             | 541 (2.0)               | 357 (1.9)               | 138 (2.3)               | 46 (1.8)                | 0.141   |
| <b>Diabetes, n (%)</b>                                 | 5692 (21.0)             | 2859 (15.4)             | 1971 (32.9)             | 862 (33.7)              | <0.001  |
| <b>Hemiplegia, Paraplegia, n (%)</b>                   | 1232 (4.5)              | 826 (4.5)               | 271 (4.5)               | 135 (5.3)               | 0.172   |
| <b>Renal dysfunction, n (%)</b>                        | 6176 (22.8)             | 3702 (20.0)             | 1709 (28.5)             | 765 (29.9)              | <0.001  |
| <b>Cancer, n (%)</b>                                   | 4625 (17.1)             | 3289 (17.7)             | 978 (16.3)              | 358 (14.0)              | <0.001  |
| <b>Delirium, n (%)</b>                                 | 1695 (6.3)              | 868 (4.7)               | 464 (7.8)               | 363 (14.2)              | <0.001  |
| <b>Self-care Index, median [IQR]</b>                   | 39.00 [34.00, 40.00]    | 39.00 [36.00, 40.00]    | 37.00 [32.00, 40.00]    | 35.00 [30.00, 39.00]    | <0.001  |
| <b>Braden, median [IQR]</b>                            | 22.00 [20.00, 23.00]    | 23.00 [21.00, 23.00]    | 21.00 [19.00, 23.00]    | 20.00 [18.00, 22.00]    | <0.001  |
| <b>Nutrition deficiency score, median [IQR]</b>        | 1.00 [1.00, 2.00]       | 1.00 [1.00, 1.00]       | 1.00 [1.00, 2.00]       | 1.00 [1.00, 2.00]       | <0.001  |
| <b>Catheterisation, n (%)</b>                          | 7873 (29.1)             | 5468 (29.5)             | 1661 (27.7)             | 744 (29.1)              | 0.037   |
| <b>Surgery during stay, n (%)</b>                      | 8676 (32.0)             | 6630 (35.7)             | 1528 (25.5)             | 518 (20.3)              | <0.001  |
| <b>GFR [ml/min], median [IQR]</b>                      | 64.00 [45.00, 80.00]    | 65.00 [46.00, 81.00]    | 60.00 [42.50, 78.00]    | 61.00 [43.00, 79.00]    | <0.001  |
| <b>Creatinine [µmol/l], median [IQR]</b>               | 87.00 [70.00, 115.50]   | 86.00 [70.00, 113.00]   | 90.00 [72.00, 120.00]   | 88.00 [69.50, 118.00]   | <0.001  |
| <b>Sodium [mmol/l], median [IQR]</b>                   | 138.00 [135.00, 140.00] | 138.00 [135.50, 140.00] | 138.00 [135.00, 140.00] | 138.00 [135.00, 140.00] | 0.197   |
| <b>Potassium [mmol/l], median [IQR]</b>                | 4.05 [3.80, 4.35]       | 4.05 [3.80, 4.30]       | 4.10 [3.80, 4.40]       | 4.10 [3.80, 4.40]       | <0.001  |
| <b>ALAT [U/l], median [IQR]</b>                        | 20.00 [14.00, 35.00]    | 21.00 [14.00, 36.00]    | 20.00 [13.00, 34.00]    | 19.00 [13.00, 35.00]    | 0.003   |
| <b>ASAT [U/l], median [IQR]</b>                        | 25.00 [20.00, 35.00]    | 25.00 [20.00, 35.00]    | 25.00 [20.00, 35.00]    | 25.00 [19.00, 34.00]    | <0.001  |
| <b>CRP [mg/l], median [IQR]</b>                        | 12.00 [2.70, 56.00]     | 10.00 [2.00, 51.00]     | 15.50 [3.10, 62.00]     | 20.45 [5.00, 69.50]     | <0.001  |
| <b>CRP [mg/l], n (%)</b>                               |                         |                         |                         |                         | <0.001  |
| < 5                                                    | 7884 (29.1)             | 5708 (30.8)             | 1630 (27.2)             | 546 (21.3)              |         |
| 5-10                                                   | 2680 (9.9)              | 1788 (9.6)              | 619 (10.3)              | 273 (10.7)              |         |
| 10-50                                                  | 6070 (22.4)             | 3791 (20.4)             | 1554 (26.0)             | 725 (28.3)              |         |
| >50                                                    | 6116 (22.6)             | 3827 (20.6)             | 1557 (26.0)             | 732 (28.6)              |         |
| Missing                                                | 4342 (16.0)             | 3434 (18.5)             | 626 (10.5)              | 282 (11.0)              |         |
| <b>Temperature [°C], median [IQR]</b>                  | 36.55 [36.25, 36.90]    | 36.54 [36.20, 36.90]    | 36.60 [36.27, 36.95]    | 36.60 [36.30, 36.95]    | <0.001  |
| <b>Systolic blood pressure [mmHg], mean (±SD)</b>      | 134.14 (19.77)          | 134.76 (20.06)          | 132.83 (19.03)          | 133.00 (19.22)          | <0.001  |
| <b>Diastolic blood pressure [mmHg], mean (±SD)</b>     | 71.89 (11.67)           | 72.46 (11.93)           | 70.68 (11.11)           | 70.87 (10.90)           | <0.001  |
| <b>BMI, mean (±SD)</b>                                 | 26.10 (5.25)            | 25.94 (4.94)            | 26.38 (5.66)            | 26.56 (6.30)            | <0.001  |
| <b>Polymedication, mean (±SD)</b>                      | 7.58 (3.84)             | 6.46 (3.38)             | 9.09 (3.66)             | 10.91 (3.79)            | <0.001  |
| <b>ACH burden per scale, mean (±SD)</b>                | -                       | 0.00 (0.00)             | 1.42 (0.49)             | 4.08 (1.39)             | <0.001  |

| Supplementary Table S3: Table 1's categorical approach |                         |                         |                         |                         |         |
|--------------------------------------------------------|-------------------------|-------------------------|-------------------------|-------------------------|---------|
|                                                        | Overall                 | AAS No Burden           | AAS Low Burden          | AAS High Burden         | p-value |
| <b>n</b>                                               | 27092                   | 21777                   | 2604                    | 2711                    |         |
| <b>Died, n (%)</b>                                     | 913 (3.4)               | 620 (2.8)               | 128 (4.9)               | 165 (6.1)               | <0.001  |
| <b>Length of stay, median days [IQR]</b>               | 6.00 [4.00, 10.00]      | 6.00 [4.00, 10.00]      | 7.50 [5.00, 12.00]      | 8.00 [5.00, 12.00]      | <0.001  |
| <b>Age, mean years (±SD)</b>                           | 78.08 (7.69)            | 77.50 (7.57)            | 81.02 (7.65)            | 79.88 (7.75)            | <0.001  |
| <b>Age, n (%)</b>                                      |                         |                         |                         |                         | <0.001  |
| 65-75 years                                            | 10932 (40.4)            | 9422 (43.3)             | 675 (25.9)              | 835 (30.8)              |         |
| 76-85 years                                            | 11012 (40.6)            | 8708 (40.0)             | 1129 (43.4)             | 1175 (43.3)             |         |
| 86-95 years                                            | 4958 (18.3)             | 3520 (16.2)             | 769 (29.5)              | 669 (24.7)              |         |
| >95 years                                              | 190 (0.7)               | 127 (0.6)               | 31 (1.2)                | 32 (1.2)                |         |
| <b>Female sex, n (%)</b>                               | 14014 (51.7)            | 11224 (51.5)            | 1409 (54.1)             | 1381 (50.9)             | 0.032   |
| <b>Department, n (%)</b>                               |                         |                         |                         |                         |         |
| Medical department                                     | 15119 (55.8)            | 11058 (50.8)            | 1786 (68.6)             | 2275 (83.9)             | <0.001  |
| Surgical department                                    | 11973 (44.2)            | 10719 (49.2)            | 818 (31.4)              | 436 (16.1)              |         |
| <b>Hearing device, n (%)</b>                           |                         |                         |                         |                         | <0.001  |
| None                                                   | 15674 (57.9)            | 12684 (58.2)            | 1473 (56.6)             | 1517 (56.0)             |         |
| Hearing device                                         | 2976 (11.0)             | 2286 (10.5)             | 365 (14.0)              | 325 (12.0)              |         |
| Missing                                                | 8442 (31.2)             | 6807 (31.3)             | 766 (29.4)              | 869 (32.1)              |         |
| <b>Visual aid, n (%)</b>                               |                         |                         |                         |                         | <0.001  |
| None                                                   | 4956 (18.3)             | 3826 (17.6)             | 539 (20.7)              | 591 (21.8)              |         |
| Glasses or contacts                                    | 13630 (50.3)            | 11088 (50.9)            | 1297 (49.8)             | 1245 (45.9)             |         |
| Missing                                                | 8506 (31.4)             | 6863 (31.5)             | 768 (29.5)              | 875 (32.3)              |         |
| <b>Acute myocardial infarction, n (%)</b>              | 1442 (5.3)              | 1165 (5.3)              | 128 (4.9)               | 149 (5.5)               | 0.592   |
| <b>Congestive heart failure, n (%)</b>                 | 4751 (17.5)             | 2821 (13.0)             | 917 (35.2)              | 1013 (37.4)             | <0.001  |
| <b>Peripheal vascular disease, n (%)</b>               | 3691 (13.6)             | 2880 (13.2)             | 385 (14.8)              | 426 (15.7)              | <0.001  |
| <b>Cerebrovascular disease, n (%)</b>                  | 3462 (12.8)             | 2840 (13.0)             | 317 (12.2)              | 305 (11.3)              | 0.019   |
| <b>Dementia, n (%)</b>                                 | 2595 (9.6)              | 1554 (7.1)              | 622 (23.9)              | 419 (15.5)              | <0.001  |
| <b>COPD, n (%)</b>                                     | 3041 (11.2)             | 1783 (8.2)              | 256 (9.8)               | 1002 (37.0)             | <0.001  |
| <b>Rheumatoid disease, n (%)</b>                       | 798 (2.9)               | 618 (2.8)               | 81 (3.1)                | 99 (3.7)                | 0.053   |
| <b>Peptic ulcer disease, n (%)</b>                     | 542 (2.0)               | 443 (2.0)               | 54 (2.1)                | 45 (1.7)                | 0.406   |
| <b>Liverdisease, n (%)</b>                             | 541 (2.0)               | 434 (2.0)               | 57 (2.2)                | 50 (1.8)                | 0.665   |
| <b>Diabetes, n (%)</b>                                 | 5692 (21.0)             | 4363 (20.0)             | 652 (25.0)              | 677 (25.0)              | <0.001  |
| <b>Hemiplegia, Paraplegia, n (%)</b>                   | 1232 (4.5)              | 987 (4.5)               | 127 (4.9)               | 118 (4.4)               | 0.637   |
| <b>Renal dysfunction, n (%)</b>                        | 6176 (22.8)             | 4366 (20.0)             | 898 (34.5)              | 912 (33.6)              | <0.001  |
| <b>Cancer, n (%)</b>                                   | 4625 (17.1)             | 3955 (18.2)             | 348 (13.4)              | 322 (11.9)              | <0.001  |
| <b>Delirium, n (%)</b>                                 | 1695 (6.3)              | 1015 (4.7)              | 379 (14.6)              | 301 (11.1)              | <0.001  |
| <b>Self-care Index, median [IQR]</b>                   | 39.00 [34.00, 40.00]    | 39.00 [35.00, 40.00]    | 35.00 [30.00, 39.00]    | 35.00 [30.00, 39.00]    | <0.001  |
| <b>Braden, median [IQR]</b>                            | 22.00 [20.00, 23.00]    | 23.00 [20.00, 23.00]    | 21.00 [18.00, 23.00]    | 21.00 [18.00, 23.00]    | <0.001  |
| <b>Nutrition deficiency score, median [IQR]</b>        | 1.00 [1.00, 2.00]       | 1.00 [1.00, 1.00]       | 1.00 [1.00, 2.00]       | 1.00 [1.00, 2.00]       | <0.001  |
| <b>Catheterisation, n (%)</b>                          | 7873 (29.1)             | 6168 (28.3)             | 915 (35.1)              | 790 (29.1)              | <0.001  |
| <b>Surgery during stay, n (%)</b>                      | 8676 (32.0)             | 7801 (35.8)             | 599 (23.0)              | 276 (10.2)              | <0.001  |
| <b>GFR [ml/min], median [IQR]</b>                      | 64.00 [45.00, 80.00]    | 65.00 [46.50, 81.00]    | 55.50 [38.00, 74.50]    | 60.00 [41.00, 78.00]    | <0.001  |
| <b>Creatinine [µmol/l], median [IQR]</b>               | 87.00 [70.00, 115.50]   | 86.00 [69.50, 113.00]   | 94.50 [74.00, 128.00]   | 91.00 [72.00, 123.50]   | <0.001  |
| <b>Sodium [mmol/l], median [IQR]</b>                   | 138.00 [135.00, 140.00] | 138.00 [135.00, 140.00] | 138.17 [135.50, 141.00] | 138.00 [135.00, 140.00] | <0.001  |
| <b>Potassium [mmol/l], median [IQR]</b>                | 4.05 [3.80, 4.35]       | 4.05 [3.80, 4.35]       | 4.10 [3.80, 4.40]       | 4.10 [3.75, 4.40]       | 0.003   |
| <b>ALAT [U/l], median [IQR]</b>                        | 20.00 [14.00, 35.00]    | 20.00 [14.00, 35.00]    | 21.00 [13.00, 37.00]    | 20.00 [13.00, 36.00]    | 0.783   |
| <b>ASAT [U/l], median [IQR]</b>                        | 25.00 [20.00, 35.00]    | 25.00 [20.00, 35.00]    | 26.00 [20.00, 36.00]    | 26.00 [20.00, 36.00]    | 0.039   |
| <b>CRP [mg/l], median [IQR]</b>                        | 12.00 [2.70, 56.00]     | 10.00 [2.05, 51.00]     | 13.00 [3.30, 48.82]     | 36.00 [9.00, 93.00]     | <0.001  |
| <b>CRP [mg/l], n (%)</b>                               |                         |                         |                         |                         | <0.001  |
| < 5                                                    | 7884 (29.1)             | 6757 (31.0)             | 700 (26.9)              | 427 (15.8)              |         |
| 5-10                                                   | 2680 (9.9)              | 2123 (9.7)              | 310 (11.9)              | 247 (9.1)               |         |
| 10-50                                                  | 6070 (22.4)             | 4541 (20.9)             | 706 (27.1)              | 823 (30.4)              |         |
| >50                                                    | 6116 (22.6)             | 4518 (20.7)             | 558 (21.4)              | 1040 (38.4)             |         |
| Missing                                                | 4342 (16.0)             | 3838 (17.6)             | 330 (12.7)              | 174 (6.4)               |         |
| <b>Temperature [°C], median [IQR]</b>                  | 36.55 [36.25, 36.90]    | 36.53 [36.20, 36.90]    | 36.60 [36.25, 36.90]    | 36.70 [36.37, 37.12]    | <0.001  |
| <b>Systolic blood pressure [mmHg], mean (±SD)</b>      | 134.14 (19.77)          | 134.95 (19.89)          | 131.85 (19.15)          | 130.18 (18.74)          | <0.001  |
| <b>Diastolic blood pressure [mmHg], mean (±SD)</b>     | 71.89 (11.67)           | 72.34 (11.77)           | 70.54 (11.36)           | 69.83 (10.92)           | <0.001  |
| <b>BMI, mean (±SD)</b>                                 | 26.10 (5.25)            | 26.08 (5.08)            | 26.07 (5.59)            | 26.28 (6.25)            | 0.318   |
| <b>Polymedication, mean (±SD)</b>                      | 7.58 (3.84)             | 6.95 (3.59)             | 9.25 (3.68)             | 10.38 (3.95)            | <0.001  |
| <b>ACH burden per scale, mean (±SD)</b>                | -                       | 0.00 (0.00)             | 1.32 (0.47)             | 6.16 (3.24)             | <0.001  |

| Supplementary Table S3: Table 1's categorical approach |                         |                         |                         |                         |         |
|--------------------------------------------------------|-------------------------|-------------------------|-------------------------|-------------------------|---------|
|                                                        | Overall                 | ARS No Burden           | ARS Low Burden          | ARS High Burden         | p-value |
| <b>n</b>                                               | 27092                   | 22015                   | 3806                    | 1271                    |         |
| <b>Died, n (%)</b>                                     | 913 (3.4)               | 639 (2.9)               | 177 (4.7)               | 97 (7.6)                | <0.001  |
| <b>Length of stay, median days [IQR]</b>               | 6.00 [4.00, 10.00]      | 6.00 [4.00, 10.00]      | 7.00 [5.00, 11.00]      | 7.00 [5.00, 12.00]      | <0.001  |
| <b>Age, mean years (±SD)</b>                           | 78.08 (7.69)            | 77.70 (7.62)            | 79.65 (7.78)            | 79.82 (7.61)            | <0.001  |
| <b>Age, n (%)</b>                                      |                         |                         |                         |                         | <0.001  |
| 65-75 years                                            | 10932 (40.4)            | 9322 (42.3)             | 1227 (32.2)             | 383 (30.1)              |         |
| 76-85 years                                            | 11012 (40.6)            | 8810 (40.0)             | 1625 (42.7)             | 577 (45.4)              |         |
| 86-95 years                                            | 4958 (18.3)             | 3744 (17.0)             | 919 (24.1)              | 295 (23.2)              |         |
| >95 years                                              | 190 (0.7)               | 139 (0.6)               | 35 (0.9)                | 16 (1.3)                |         |
| <b>Female sex, n (%)</b>                               | 14014 (51.7)            | 11102 (50.4)            | 2210 (58.1)             | 702 (55.2)              | <0.001  |
| <b>Department, n (%)</b>                               |                         |                         |                         |                         |         |
| Medical department                                     | 15119 (55.8)            | 11886 (54.0)            | 2363 (62.1)             | 870 (68.5)              | <0.001  |
| Surgical department                                    | 11973 (44.2)            | 10129 (46.0)            | 1443 (37.9)             | 401 (31.5)              |         |
| <b>Hearing device, n (%)</b>                           |                         |                         |                         |                         | 0.002   |
| None                                                   | 15674 (57.9)            | 12667 (57.5)            | 2265 (59.5)             | 742 (58.4)              |         |
| Hearing device                                         | 2976 (11.0)             | 2381 (10.8)             | 456 (12.0)              | 139 (10.9)              |         |
| Missing                                                | 8442 (31.2)             | 6967 (31.6)             | 1085 (28.5)             | 390 (30.7)              |         |
| <b>Visual aid, n (%)</b>                               |                         |                         |                         |                         | <0.001  |
| None                                                   | 4956 (18.3)             | 3895 (17.7)             | 764 (20.1)              | 297 (23.4)              |         |
| Glasses or contacts                                    | 13630 (50.3)            | 11090 (50.4)            | 1954 (51.3)             | 586 (46.1)              |         |
| Missing                                                | 8506 (31.4)             | 7030 (31.9)             | 1088 (28.6)             | 388 (30.5)              |         |
| <b>Acute myocardial infarction, n (%)</b>              | 1442 (5.3)              | 1206 (5.5)              | 191 (5.0)               | 45 (3.5)                | 0.008   |
| <b>Congestive heart failure, n (%)</b>                 | 4751 (17.5)             | 3695 (16.8)             | 826 (21.7)              | 230 (18.1)              | <0.001  |
| <b>Peripheal vascular disease, n (%)</b>               | 3691 (13.6)             | 2916 (13.2)             | 605 (15.9)              | 170 (13.4)              | <0.001  |
| <b>Cerebrovascular disease, n (%)</b>                  | 3462 (12.8)             | 2811 (12.8)             | 474 (12.5)              | 177 (13.9)              | 0.394   |
| <b>Dementia, n (%)</b>                                 | 2595 (9.6)              | 1441 (6.5)              | 770 (20.2)              | 384 (30.2)              | <0.001  |
| <b>COPD, n (%)</b>                                     | 3041 (11.2)             | 2406 (10.9)             | 506 (13.3)              | 129 (10.1)              | <0.001  |
| <b>Rheumatoid disease, n (%)</b>                       | 798 (2.9)               | 625 (2.8)               | 143 (3.8)               | 30 (2.4)                | 0.004   |
| <b>Peptic ulcer disease, n (%)</b>                     | 542 (2.0)               | 431 (2.0)               | 83 (2.2)                | 28 (2.2)                | 0.576   |
| <b>Liverdisease, n (%)</b>                             | 541 (2.0)               | 440 (2.0)               | 82 (2.2)                | 19 (1.5)                | 0.346   |
| <b>Diabetes, n (%)</b>                                 | 5692 (21.0)             | 4530 (20.6)             | 896 (23.5)              | 266 (20.9)              | <0.001  |
| <b>Hemiplegia, Paraplegia, n (%)</b>                   | 1232 (4.5)              | 966 (4.4)               | 174 (4.6)               | 92 (7.2)                | <0.001  |
| <b>Renal dysfunction, n (%)</b>                        | 6176 (22.8)             | 4746 (21.6)             | 1095 (28.8)             | 335 (26.4)              | <0.001  |
| <b>Cancer, n (%)</b>                                   | 4625 (17.1)             | 3718 (16.9)             | 669 (17.6)              | 238 (18.7)              | 0.16    |
| <b>Delirium, n (%)</b>                                 | 1695 (6.3)              | 965 (4.4)               | 440 (11.6)              | 290 (22.8)              | <0.001  |
| <b>Self-care Index, median [IQR]</b>                   | 39.00 [34.00, 40.00]    | 39.00 [35.00, 40.00]    | 36.00 [31.00, 40.00]    | 33.00 [25.00, 39.00]    | <0.001  |
| <b>Braden, median [IQR]</b>                            | 22.00 [20.00, 23.00]    | 23.00 [20.00, 23.00]    | 21.00 [18.00, 23.00]    | 19.00 [17.00, 22.00]    | <0.001  |
| <b>Nutrition deficiency score, median [IQR]</b>        | 1.00 [1.00, 2.00]       | 1.00 [1.00, 1.00]       | 1.00 [1.00, 2.00]       | 1.00 [1.00, 3.00]       | <0.001  |
| <b>Catheterisation, n (%)</b>                          | 7873 (29.1)             | 6247 (28.4)             | 1214 (31.9)             | 412 (32.4)              | <0.001  |
| <b>Surgery during stay, n (%)</b>                      | 8676 (32.0)             | 7422 (33.7)             | 1019 (26.8)             | 235 (18.5)              | <0.001  |
| <b>GFR [ml/min], median [IQR]</b>                      | 64.00 [45.00, 80.00]    | 64.00 [46.00, 81.00]    | 60.50 [42.00, 78.00]    | 63.00 [44.00, 80.50]    | <0.001  |
| <b>Creatinine [µmol/l], median [IQR]</b>               | 87.00 [70.00, 115.50]   | 87.00 [70.00, 115.00]   | 88.00 [69.50, 118.00]   | 85.50 [67.00, 115.00]   | 0.129   |
| <b>Sodium [mmol/l], median [IQR]</b>                   | 138.00 [135.00, 140.00] | 138.00 [135.00, 140.00] | 138.00 [135.00, 140.00] | 138.00 [135.00, 140.00] | 0.961   |
| <b>Potassium [mmol/l], median [IQR]</b>                | 4.05 [3.80, 4.35]       | 4.05 [3.80, 4.35]       | 4.05 [3.70, 4.40]       | 4.05 [3.70, 4.39]       | 0.443   |
| <b>ALAT [U/l], median [IQR]</b>                        | 20.00 [14.00, 35.00]    | 20.25 [14.00, 36.00]    | 20.00 [13.00, 35.00]    | 18.00 [12.00, 30.88]    | <0.001  |
| <b>ASAT [U/l], median [IQR]</b>                        | 25.00 [20.00, 35.00]    | 25.00 [20.00, 35.00]    | 25.00 [20.00, 35.00]    | 25.00 [20.00, 34.00]    | 0.037   |
| <b>CRP [mg/l], median [IQR]</b>                        | 12.00 [2.70, 56.00]     | 11.22 [2.45, 55.00]     | 14.52 [3.12, 57.12]     | 18.00 [4.00, 65.19]     | <0.001  |
| <b>CRP [mg/l], n (%)</b>                               |                         |                         |                         |                         | <0.001  |
| < 5                                                    | 7884 (29.1)             | 6575 (29.9)             | 1005 (26.4)             | 304 (23.9)              |         |
| 5-10                                                   | 2680 (9.9)              | 2146 (9.7)              | 415 (10.9)              | 119 (9.4)               |         |
| 10-50                                                  | 6070 (22.4)             | 4777 (21.7)             | 970 (25.5)              | 323 (25.4)              |         |
| >50                                                    | 6116 (22.6)             | 4878 (22.2)             | 912 (24.0)              | 326 (25.6)              |         |
| Missing                                                | 4342 (16.0)             | 3639 (16.5)             | 504 (13.2)              | 199 (15.7)              |         |
| <b>Temperature [°C], median [IQR]</b>                  | 36.55 [36.25, 36.90]    | 36.55 [36.22, 36.90]    | 36.60 [36.26, 36.93]    | 36.60 [36.30, 37.00]    | <0.001  |
| <b>Systolic blood pressure [mmHg], mean (±SD)</b>      | 134.14 (19.77)          | 134.64 (19.81)          | 132.38 (19.30)          | 131.24 (19.91)          | <0.001  |
| <b>Diastolic blood pressure [mmHg], mean (±SD)</b>     | 71.89 (11.67)           | 72.30 (11.74)           | 70.24 (11.19)           | 70.20 (11.41)           | <0.001  |
| <b>BMI, mean (±SD)</b>                                 | 26.10 (5.25)            | 26.19 (5.19)            | 25.83 (5.56)            | 25.15 (5.44)            | <0.001  |
| <b>Polymedication, mean (±SD)</b>                      | 7.58 (3.84)             | 7.00 (3.62)             | 9.51 (3.85)             | 10.53 (3.81)            | <0.001  |
| <b>ACH burden per scale, mean (±SD)</b>                | -                       | 0.00 (0.00)             | 1.28 (0.45)             | 4.24 (1.84)             | <0.001  |



| Supplementary Table S3: Table 1's categorical approach |                         |                         |                         |                         |         |
|--------------------------------------------------------|-------------------------|-------------------------|-------------------------|-------------------------|---------|
|                                                        | Overall                 | ACL No Burden           | ACL Low Burden          | ACL High Burden         | p-value |
| <b>n</b>                                               | 27092                   | 19473                   | 5506                    | 2113                    |         |
| <b>Died, n (%)</b>                                     | 913 (3.4)               | 603 (3.1)               | 191 (3.5)               | 119 (5.6)               | <0.001  |
| <b>Length of stay, median days [IQR]</b>               | 6.00 [4.00, 10.00]      | 6.00 [4.00, 10.00]      | 7.00 [4.00, 11.00]      | 8.00 [5.00, 12.00]      | <0.001  |
| <b>Age, mean years (±SD)</b>                           | 78.08 (7.69)            | 77.90 (7.66)            | 78.45 (7.75)            | 78.71 (7.70)            | <0.001  |
| <b>Age, n (%)</b>                                      |                         |                         |                         |                         | <0.001  |
| 65-75 years                                            | 10932 (40.4)            | 8065 (41.4)             | 2112 (38.4)             | 755 (35.7)              |         |
| 76-85 years                                            | 11012 (40.6)            | 7845 (40.3)             | 2261 (41.1)             | 906 (42.9)              |         |
| 86-95 years                                            | 4958 (18.3)             | 3427 (17.6)             | 1095 (19.9)             | 436 (20.6)              |         |
| >95 years                                              | 190 (0.7)               | 136 (0.7)               | 38 (0.7)                | 16 (0.8)                |         |
| <b>Female sex, n (%)</b>                               | 14014 (51.7)            | 9546 (49.0)             | 3145 (57.1)             | 1323 (62.6)             | <0.001  |
| <b>Department, n (%)</b>                               |                         |                         |                         |                         |         |
| Medical department                                     | 15119 (55.8)            | 10633 (54.6)            | 3264 (59.3)             | 1222 (57.8)             | <0.001  |
| Surgical department                                    | 11973 (44.2)            | 8840 (45.4)             | 2242 (40.7)             | 891 (42.2)              |         |
| <b>Hearing device, n (%)</b>                           |                         |                         |                         |                         | <0.001  |
| None                                                   | 15674 (57.9)            | 10983 (56.4)            | 3377 (61.3)             | 1314 (62.2)             |         |
| Hearing device                                         | 2976 (11.0)             | 2099 (10.8)             | 634 (11.5)              | 243 (11.5)              |         |
| Missing                                                | 8442 (31.2)             | 6391 (32.8)             | 1495 (27.2)             | 556 (26.3)              |         |
| <b>Visual aid, n (%)</b>                               |                         |                         |                         |                         | <0.001  |
| None                                                   | 4956 (18.3)             | 3438 (17.7)             | 1088 (19.8)             | 430 (20.4)              |         |
| Glasses or contacts                                    | 13630 (50.3)            | 9597 (49.3)             | 2915 (52.9)             | 1118 (52.9)             |         |
| Missing                                                | 8506 (31.4)             | 6438 (33.1)             | 1503 (27.3)             | 565 (26.7)              |         |
| <b>Acute myocardial infarction, n (%)</b>              | 1442 (5.3)              | 1077 (5.5)              | 274 (5.0)               | 91 (4.3)                | 0.026   |
| <b>Congestive heart failure, n (%)</b>                 | 4751 (17.5)             | 3335 (17.1)             | 1050 (19.1)             | 366 (17.3)              | 0.004   |
| <b>Peripheal vascular disease, n (%)</b>               | 3691 (13.6)             | 2515 (12.9)             | 850 (15.4)              | 326 (15.4)              | <0.001  |
| <b>Cerebrovascular disease, n (%)</b>                  | 3462 (12.8)             | 2587 (13.3)             | 655 (11.9)              | 220 (10.4)              | <0.001  |
| <b>Dementia, n (%)</b>                                 | 2595 (9.6)              | 1607 (8.3)              | 663 (12.0)              | 325 (15.4)              | <0.001  |
| <b>COPD, n (%)</b>                                     | 3041 (11.2)             | 2074 (10.7)             | 709 (12.9)              | 258 (12.2)              | <0.001  |
| <b>Rheumatoid disease, n (%)</b>                       | 798 (2.9)               | 496 (2.5)               | 198 (3.6)               | 104 (4.9)               | <0.001  |
| <b>Peptic ulcer disease, n (%)</b>                     | 542 (2.0)               | 386 (2.0)               | 112 (2.0)               | 44 (2.1)                | 0.934   |
| <b>Liverdisease, n (%)</b>                             | 541 (2.0)               | 376 (1.9)               | 132 (2.4)               | 33 (1.6)                | 0.03    |
| <b>Diabetes, n (%)</b>                                 | 5692 (21.0)             | 3181 (16.3)             | 1883 (34.2)             | 628 (29.7)              | <0.001  |
| <b>Hemiplegia, Paraplegia, n (%)</b>                   | 1232 (4.5)              | 893 (4.6)               | 235 (4.3)               | 104 (4.9)               | 0.419   |
| <b>Renal dysfunction, n (%)</b>                        | 6176 (22.8)             | 4308 (22.1)             | 1385 (25.2)             | 483 (22.9)              | <0.001  |
| <b>Cancer, n (%)</b>                                   | 4625 (17.1)             | 3245 (16.7)             | 949 (17.2)              | 431 (20.4)              | <0.001  |
| <b>Delirium, n (%)</b>                                 | 1695 (6.3)              | 1090 (5.6)              | 369 (6.7)               | 236 (11.2)              | <0.001  |
| <b>Self-care Index, median [IQR]</b>                   | 39.00 [34.00, 40.00]    | 39.00 [35.00, 40.00]    | 38.00 [33.00, 40.00]    | 35.00 [30.00, 39.00]    | <0.001  |
| <b>Braden, median [IQR]</b>                            | 22.00 [20.00, 23.00]    | 23.00 [20.00, 23.00]    | 21.00 [19.00, 23.00]    | 20.00 [18.00, 22.00]    | <0.001  |
| <b>Nutrition deficiency score, median [IQR]</b>        | 1.00 [1.00, 2.00]       | 1.00 [1.00, 1.00]       | 1.00 [1.00, 2.00]       | 1.00 [1.00, 3.00]       | <0.001  |
| <b>Catheterisation, n (%)</b>                          | 7873 (29.1)             | 5945 (30.5)             | 1434 (26.0)             | 494 (23.4)              | <0.001  |
| <b>Surgery during stay, n (%)</b>                      | 8676 (32.0)             | 6676 (34.3)             | 1515 (27.5)             | 485 (23.0)              | <0.001  |
| <b>GFR [ml/min], median [IQR]</b>                      | 64.00 [45.00, 80.00]    | 64.00 [45.00, 80.00]    | 63.00 [45.00, 79.00]    | 65.00 [47.00, 81.50]    | 0.001   |
| <b>Creatinine [µmol/l], median [IQR]</b>               | 87.00 [70.00, 115.50]   | 88.00 [71.00, 117.00]   | 87.00 [69.00, 114.00]   | 82.50 [65.00, 108.25]   | <0.001  |
| <b>Sodium [mmol/l], median [IQR]</b>                   | 138.00 [135.00, 140.00] | 138.00 [135.50, 140.00] | 138.00 [135.00, 140.00] | 137.00 [134.00, 140.00] | <0.001  |
| <b>Potassium [mmol/l], median [IQR]</b>                | 4.05 [3.80, 4.35]       | 4.05 [3.80, 4.35]       | 4.10 [3.77, 4.40]       | 4.05 [3.70, 4.35]       | 0.066   |
| <b>ALAT [U/l], median [IQR]</b>                        | 20.00 [14.00, 35.00]    | 21.00 [14.00, 37.00]    | 19.00 [13.00, 32.00]    | 19.00 [12.00, 32.75]    | <0.001  |
| <b>ASAT [U/l], median [IQR]</b>                        | 25.00 [20.00, 35.00]    | 26.00 [20.00, 35.00]    | 25.00 [20.00, 34.00]    | 25.00 [20.00, 34.00]    | <0.001  |
| <b>CRP [mg/l], median [IQR]</b>                        | 12.00 [2.70, 56.00]     | 11.00 [2.30, 54.95]     | 14.00 [3.00, 57.46]     | 15.75 [3.64, 59.02]     | <0.001  |
| <b>CRP [mg/l], n (%)</b>                               |                         |                         |                         |                         | <0.001  |
| < 5                                                    | 7884 (29.1)             | 5801 (29.8)             | 1520 (27.6)             | 563 (26.6)              |         |
| 5-10                                                   | 2680 (9.9)              | 1847 (9.5)              | 595 (10.8)              | 238 (11.3)              |         |
| 10-50                                                  | 6070 (22.4)             | 4073 (20.9)             | 1414 (25.7)             | 583 (27.6)              |         |
| >50                                                    | 6116 (22.6)             | 4221 (21.7)             | 1343 (24.4)             | 552 (26.1)              |         |
| Missing                                                | 4342 (16.0)             | 3531 (18.1)             | 634 (11.5)              | 177 (8.4)               |         |
| <b>Temperature [°C], median [IQR]</b>                  | 36.55 [36.25, 36.90]    | 36.55 [36.20, 36.90]    | 36.60 [36.30, 36.90]    | 36.60 [36.30, 36.90]    | <0.001  |
| <b>Systolic blood pressure [mmHg], mean (±SD)</b>      | 134.14 (19.77)          | 134.16 (19.99)          | 133.66 (19.05)          | 135.15 (19.64)          | 0.012   |
| <b>Diastolic blood pressure [mmHg], mean (±SD)</b>     | 71.89 (11.67)           | 72.29 (11.96)           | 70.82 (10.85)           | 71.27 (11.02)           | <0.001  |
| <b>BMI, mean (±SD)</b>                                 | 26.10 (5.25)            | 26.02 (5.02)            | 26.39 (5.64)            | 26.02 (6.11)            | 0.001   |
| <b>Polymedication, mean (±SD)</b>                      | 7.58 (3.84)             | 6.55 (3.43)             | 9.34 (3.57)             | 11.13 (3.81)            | <0.001  |
| <b>ACH burden per scale, mean (±SD)</b>                | -                       | 0.00 (0.00)             | 1.40 (0.49)             | 4.42 (1.85)             | <0.001  |

| Supplementary Table S3: Table 1's categorical approach |                         |                         |                         |                         |         |
|--------------------------------------------------------|-------------------------|-------------------------|-------------------------|-------------------------|---------|
|                                                        | Overall                 | CrAS No Burden          | CrAS Low Burden         | CrAS High Burden        | p-value |
| <b>n</b>                                               | 27092                   | 16621                   | 6698                    | 3773                    |         |
| <b>Died, n (%)</b>                                     | 913 (3.4)               | 470 (2.8)               | 205 (3.1)               | 238 (6.3)               | <0.001  |
| <b>Length of stay, median days [IQR]</b>               | 6.00 [4.00, 10.00]      | 6.00 [4.00, 10.00]      | 6.00 [4.00, 10.00]      | 7.00 [5.00, 12.00]      | <0.001  |
| <b>Age, mean years (±SD)</b>                           | 78.08 (7.69)            | 77.75 (7.63)            | 78.25 (7.65)            | 79.22 (7.88)            | <0.001  |
| <b>Age, n (%)</b>                                      |                         |                         |                         |                         | <0.001  |
| 65-75 years                                            | 10932 (40.4)            | 6993 (42.1)             | 2643 (39.5)             | 1296 (34.3)             |         |
| 76-85 years                                            | 11012 (40.6)            | 6709 (40.4)             | 2741 (40.9)             | 1562 (41.4)             |         |
| 86-95 years                                            | 4958 (18.3)             | 2815 (16.9)             | 1261 (18.8)             | 882 (23.4)              |         |
| >95 years                                              | 190 (0.7)               | 104 (0.6)               | 53 (0.8)                | 33 (0.9)                |         |
| <b>Female sex, n (%)</b>                               | 14014 (51.7)            | 8146 (49.0)             | 3668 (54.8)             | 2200 (58.3)             | <0.001  |
| <b>Department, n (%)</b>                               |                         |                         |                         |                         |         |
| Medical department                                     | 15119 (55.8)            | 9568 (57.6)             | 3469 (51.8)             | 2082 (55.2)             | <0.001  |
| Surgical department                                    | 11973 (44.2)            | 7053 (42.4)             | 3229 (48.2)             | 1691 (44.8)             |         |
| <b>Hearing device, n (%)</b>                           |                         |                         |                         |                         | <0.001  |
| None                                                   | 15674 (57.9)            | 9259 (55.7)             | 4112 (61.4)             | 2303 (61.0)             |         |
| Hearing device                                         | 2976 (11.0)             | 1762 (10.6)             | 796 (11.9)              | 418 (11.1)              |         |
| Missing                                                | 8442 (31.2)             | 5600 (33.7)             | 1790 (26.7)             | 1052 (27.9)             |         |
| <b>Visual aid, n (%)</b>                               |                         |                         |                         |                         | <0.001  |
| None                                                   | 4956 (18.3)             | 2888 (17.4)             | 1270 (19.0)             | 798 (21.2)              |         |
| Glasses or contacts                                    | 13630 (50.3)            | 8100 (48.7)             | 3617 (54.0)             | 1913 (50.7)             |         |
| Missing                                                | 8506 (31.4)             | 5633 (33.9)             | 1811 (27.0)             | 1062 (28.1)             |         |
| <b>Acute myocardial infarction, n (%)</b>              | 1442 (5.3)              | 868 (5.2)               | 409 (6.1)               | 165 (4.4)               | <0.001  |
| <b>Congestive heart failure, n (%)</b>                 | 4751 (17.5)             | 2798 (16.8)             | 1246 (18.6)             | 707 (18.7)              | 0.001   |
| <b>Peripheal vascular disease, n (%)</b>               | 3691 (13.6)             | 2155 (13.0)             | 999 (14.9)              | 537 (14.2)              | <0.001  |
| <b>Cerebrovascular disease, n (%)</b>                  | 3462 (12.8)             | 2356 (14.2)             | 678 (10.1)              | 428 (11.3)              | <0.001  |
| <b>Dementia, n (%)</b>                                 | 2595 (9.6)              | 1218 (7.3)              | 625 (9.3)               | 752 (19.9)              | <0.001  |
| <b>COPD, n (%)</b>                                     | 3041 (11.2)             | 1858 (11.2)             | 758 (11.3)              | 425 (11.3)              | 0.952   |
| <b>Rheumatoid disease, n (%)</b>                       | 798 (2.9)               | 427 (2.6)               | 229 (3.4)               | 142 (3.8)               | <0.001  |
| <b>Peptic ulcer disease, n (%)</b>                     | 542 (2.0)               | 349 (2.1)               | 117 (1.7)               | 76 (2.0)                | 0.219   |
| <b>Liverdisease, n (%)</b>                             | 541 (2.0)               | 374 (2.3)               | 105 (1.6)               | 62 (1.6)                | 0.001   |
| <b>Diabetes, n (%)</b>                                 | 5692 (21.0)             | 3377 (20.3)             | 1495 (22.3)             | 820 (21.7)              | 0.002   |
| <b>Hemiplegia, Paraplegia, n (%)</b>                   | 1232 (4.5)              | 823 (5.0)               | 220 (3.3)               | 189 (5.0)               | <0.001  |
| <b>Renal dysfunction, n (%)</b>                        | 6176 (22.8)             | 3645 (21.9)             | 1637 (24.4)             | 894 (23.7)              | <0.001  |
| <b>Cancer, n (%)</b>                                   | 4625 (17.1)             | 2966 (17.8)             | 1024 (15.3)             | 635 (16.8)              | <0.001  |
| <b>Delirium, n (%)</b>                                 | 1695 (6.3)              | 803 (4.8)               | 351 (5.2)               | 541 (14.3)              | <0.001  |
| <b>Self-care Index, median [IQR]</b>                   | 39.00 [34.00, 40.00]    | 39.00 [36.00, 40.00]    | 39.00 [34.00, 40.00]    | 36.00 [30.00, 39.00]    | <0.001  |
| <b>Braden, median [IQR]</b>                            | 22.00 [20.00, 23.00]    | 23.00 [20.00, 23.00]    | 22.00 [20.00, 23.00]    | 21.00 [18.00, 23.00]    | <0.001  |
| <b>Nutrition deficiency score, median [IQR]</b>        | 1.00 [1.00, 2.00]       | 1.00 [1.00, 1.00]       | 1.00 [1.00, 2.00]       | 1.00 [1.00, 2.00]       | <0.001  |
| <b>Catheterisation, n (%)</b>                          | 7873 (29.1)             | 4780 (28.8)             | 1947 (29.1)             | 1146 (30.4)             | 0.143   |
| <b>Surgery during stay, n (%)</b>                      | 8676 (32.0)             | 5196 (31.3)             | 2344 (35.0)             | 1136 (30.1)             | <0.001  |
| <b>GFR [ml/min], median [IQR]</b>                      | 64.00 [45.00, 80.00]    | 64.00 [45.50, 80.00]    | 62.00 [44.00, 79.50]    | 64.00 [45.00, 81.00]    | <0.001  |
| <b>Creatinine [µmol/l], median [IQR]</b>               | 87.00 [70.00, 115.50]   | 87.17 [71.00, 115.50]   | 88.00 [70.00, 117.00]   | 84.00 [66.50, 113.00]   | <0.001  |
| <b>Sodium [mmol/l], median [IQR]</b>                   | 138.00 [135.00, 140.00] | 138.00 [135.50, 140.00] | 138.00 [135.00, 140.00] | 138.00 [135.00, 140.00] | <0.001  |
| <b>Potassium [mmol/l], median [IQR]</b>                | 4.05 [3.80, 4.35]       | 4.05 [3.77, 4.30]       | 4.10 [3.80, 4.40]       | 4.10 [3.80, 4.40]       | 0.019   |
| <b>ALAT [U/l], median [IQR]</b>                        | 20.00 [14.00, 35.00]    | 21.00 [14.00, 36.00]    | 19.00 [13.00, 32.50]    | 20.00 [13.00, 36.00]    | 0.001   |
| <b>ASAT [U/l], median [IQR]</b>                        | 25.00 [20.00, 35.00]    | 25.50 [20.00, 36.00]    | 25.00 [20.00, 34.00]    | 25.00 [20.00, 34.00]    | 0.051   |
| <b>CRP [mg/l], median [IQR]</b>                        | 12.00 [2.70, 56.00]     | 10.50 [2.10, 54.00]     | 13.10 [3.00, 56.00]     | 18.00 [4.00, 61.00]     | <0.001  |
| <b>CRP [mg/l], n (%)</b>                               |                         |                         |                         |                         | <0.001  |
| < 5                                                    | 7884 (29.1)             | 5263 (31.7)             | 1765 (26.4)             | 856 (22.7)              |         |
| 5-10                                                   | 2680 (9.9)              | 1603 (9.6)              | 693 (10.3)              | 384 (10.2)              |         |
| 10-50                                                  | 6070 (22.4)             | 3524 (21.2)             | 1561 (23.3)             | 985 (26.1)              |         |
| >50                                                    | 6116 (22.6)             | 3714 (22.3)             | 1480 (22.1)             | 922 (24.4)              |         |
| Missing                                                | 4342 (16.0)             | 2517 (15.1)             | 1199 (17.9)             | 626 (16.6)              |         |
| <b>Temperature [°C], median [IQR]</b>                  | 36.55 [36.25, 36.90]    | 36.55 [36.20, 36.90]    | 36.55 [36.25, 36.90]    | 36.60 [36.30, 36.90]    | <0.001  |
| <b>Systolic blood pressure [mmHg], mean (±SD)</b>      | 134.14 (19.77)          | 134.60 (20.18)          | 133.51 (18.87)          | 133.37 (19.59)          | <0.001  |
| <b>Diastolic blood pressure [mmHg], mean (±SD)</b>     | 71.89 (11.67)           | 72.59 (12.11)           | 70.92 (10.80)           | 70.79 (11.13)           | <0.001  |
| <b>BMI, mean (±SD)</b>                                 | 26.10 (5.25)            | 26.02 (5.10)            | 26.46 (5.38)            | 25.74 (5.65)            | <0.001  |
| <b>Polymedication, mean (±SD)</b>                      | 7.58 (3.84)             | 6.33 (3.46)             | 8.64 (3.49)             | 10.30 (3.80)            | <0.001  |
| <b>ACH burden per scale, mean (±SD)</b>                | -                       | 0.00 (0.00)             | 1.46 (0.50)             | 5.03 (2.58)             | <0.001  |

| Supplementary Table S3: Table 1's categorical approach |                         |                         |                         |                         |         |
|--------------------------------------------------------|-------------------------|-------------------------|-------------------------|-------------------------|---------|
|                                                        | Overall                 | ADS No Burden           | ADS Low Burden          | ADS High Burden         | p-value |
| <b>n</b>                                               | 27092                   | 16306                   | 7613                    | 3173                    |         |
| <b>Died, n (%)</b>                                     | 913 (3.4)               | 426 (2.6)               | 265 (3.5)               | 222 (7.0)               | <0.001  |
| <b>Length of stay, median days [IQR]</b>               | 6.00 [4.00, 10.00]      | 6.00 [4.00, 10.00]      | 7.00 [4.00, 10.00]      | 8.00 [5.00, 12.00]      | <0.001  |
| <b>Age, mean years (±SD)</b>                           | 78.08 (7.69)            | 78.14 (7.64)            | 77.98 (7.79)            | 77.98 (7.69)            | 0.227   |
| <b>Age, n (%)</b>                                      |                         |                         |                         |                         | 0.196   |
| 65-75 years                                            | 10932 (40.4)            | 6507 (39.9)             | 3126 (41.1)             | 1299 (40.9)             |         |
| 76-85 years                                            | 11012 (40.6)            | 6733 (41.3)             | 3005 (39.5)             | 1274 (40.2)             |         |
| 86-95 years                                            | 4958 (18.3)             | 2949 (18.1)             | 1427 (18.7)             | 582 (18.3)              |         |
| >95 years                                              | 190 (0.7)               | 117 (0.7)               | 55 (0.7)                | 18 (0.6)                |         |
| <b>Female sex, n (%)</b>                               | 14014 (51.7)            | 7896 (48.4)             | 4256 (55.9)             | 1862 (58.7)             | <0.001  |
| <b>Department, n (%)</b>                               |                         |                         |                         |                         |         |
| Medical department                                     | 15119 (55.8)            | 9393 (57.6)             | 3870 (50.8)             | 1856 (58.5)             | <0.001  |
| Surgical department                                    | 11973 (44.2)            | 6913 (42.4)             | 3743 (49.2)             | 1317 (41.5)             |         |
| <b>Hearing device, n (%)</b>                           |                         |                         |                         |                         | <0.001  |
| None                                                   | 15674 (57.9)            | 8968 (55.0)             | 4697 (61.7)             | 2009 (63.3)             |         |
| Hearing device                                         | 2976 (11.0)             | 1720 (10.5)             | 902 (11.8)              | 354 (11.2)              |         |
| Missing                                                | 8442 (31.2)             | 5618 (34.5)             | 2014 (26.5)             | 810 (25.5)              |         |
| <b>Visual aid, n (%)</b>                               |                         |                         |                         |                         | <0.001  |
| None                                                   | 4956 (18.3)             | 2917 (17.9)             | 1398 (18.4)             | 641 (20.2)              |         |
| Glasses or contacts                                    | 13630 (50.3)            | 7732 (47.4)             | 4184 (55.0)             | 1714 (54.0)             |         |
| Missing                                                | 8506 (31.4)             | 5657 (34.7)             | 2031 (26.7)             | 818 (25.8)              |         |
| <b>Acute myocardial infarction, n (%)</b>              | 1442 (5.3)              | 979 (6.0)               | 338 (4.4)               | 125 (3.9)               | <0.001  |
| <b>Congestive heart failure, n (%)</b>                 | 4751 (17.5)             | 2475 (15.2)             | 1511 (19.8)             | 765 (24.1)              | <0.001  |
| <b>Peripheal vascular disease, n (%)</b>               | 3691 (13.6)             | 2135 (13.1)             | 1042 (13.7)             | 514 (16.2)              | <0.001  |
| <b>Cerebrovascular disease, n (%)</b>                  | 3462 (12.8)             | 2482 (15.2)             | 675 (8.9)               | 305 (9.6)               | <0.001  |
| <b>Dementia, n (%)</b>                                 | 2595 (9.6)              | 1671 (10.2)             | 615 (8.1)               | 309 (9.7)               | <0.001  |
| <b>COPD, n (%)</b>                                     | 3041 (11.2)             | 1403 (8.6)              | 1069 (14.0)             | 569 (17.9)              | <0.001  |
| <b>Rheumatoid disease, n (%)</b>                       | 798 (2.9)               | 260 (1.6)               | 360 (4.7)               | 178 (5.6)               | <0.001  |
| <b>Peptic ulcer disease, n (%)</b>                     | 542 (2.0)               | 342 (2.1)               | 140 (1.8)               | 60 (1.9)                | 0.37    |
| <b>Liverdisease, n (%)</b>                             | 541 (2.0)               | 315 (1.9)               | 148 (1.9)               | 78 (2.5)                | 0.141   |
| <b>Diabetes, n (%)</b>                                 | 5692 (21.0)             | 3467 (21.3)             | 1512 (19.9)             | 713 (22.5)              | 0.005   |
| <b>Hemiplegia, Paraplegia, n (%)</b>                   | 1232 (4.5)              | 855 (5.2)               | 242 (3.2)               | 135 (4.3)               | <0.001  |
| <b>Renal dysfunction, n (%)</b>                        | 6176 (22.8)             | 3570 (21.9)             | 1753 (23.0)             | 853 (26.9)              | <0.001  |
| <b>Cancer, n (%)</b>                                   | 4625 (17.1)             | 2576 (15.8)             | 1431 (18.8)             | 618 (19.5)              | <0.001  |
| <b>Delirium, n (%)</b>                                 | 1695 (6.3)              | 1059 (6.5)              | 402 (5.3)               | 234 (7.4)               | <0.001  |
| <b>Self-care Index, median [IQR]</b>                   | 39.00 [34.00, 40.00]    | 39.00 [35.00, 40.00]    | 39.00 [34.00, 40.00]    | 36.00 [31.25, 40.00]    | <0.001  |
| <b>Braden, median [IQR]</b>                            | 22.00 [20.00, 23.00]    | 23.00 [20.00, 23.00]    | 22.00 [20.00, 23.00]    | 21.00 [18.00, 23.00]    | <0.001  |
| <b>Nutrition deficiency score, median [IQR]</b>        | 1.00 [1.00, 2.00]       | 1.00 [1.00, 1.00]       | 1.00 [1.00, 2.00]       | 1.00 [1.00, 2.00]       | <0.001  |
| <b>Catheterisation, n (%)</b>                          | 7873 (29.1)             | 4703 (28.8)             | 2243 (29.5)             | 927 (29.2)              | 0.603   |
| <b>Surgery during stay, n (%)</b>                      | 8676 (32.0)             | 5060 (31.0)             | 2752 (36.1)             | 864 (27.2)              | <0.001  |
| <b>GFR [ml/min], median [IQR]</b>                      | 64.00 [45.00, 80.00]    | 64.00 [45.00, 80.00]    | 63.00 [45.00, 81.00]    | 63.00 [44.00, 81.50]    | 0.578   |
| <b>Creatinine [µmol/l], median [IQR]</b>               | 87.00 [70.00, 115.50]   | 88.00 [71.00, 116.00]   | 86.00 [69.00, 114.00]   | 86.00 [68.00, 116.00]   | <0.001  |
| <b>Sodium [mmol/l], median [IQR]</b>                   | 138.00 [135.00, 140.00] | 138.00 [135.50, 140.00] | 138.00 [135.00, 140.00] | 138.00 [135.00, 140.00] | <0.001  |
| <b>Potassium [mmol/l], median [IQR]</b>                | 4.05 [3.80, 4.35]       | 4.05 [3.80, 4.35]       | 4.05 [3.79, 4.35]       | 4.05 [3.75, 4.40]       | 0.974   |
| <b>ALAT [U/l], median [IQR]</b>                        | 20.00 [14.00, 35.00]    | 20.00 [14.00, 35.00]    | 20.00 [14.00, 36.00]    | 20.00 [13.75, 35.00]    | 0.928   |
| <b>ASAT [U/l], median [IQR]</b>                        | 25.00 [20.00, 35.00]    | 25.00 [20.00, 35.00]    | 25.00 [20.00, 35.00]    | 25.00 [20.00, 35.00]    | 0.859   |
| <b>CRP [mg/l], median [IQR]</b>                        | 12.00 [2.70, 56.00]     | 10.00 [2.00, 51.00]     | 14.00 [3.00, 59.15]     | 19.80 [4.60, 69.00]     | <0.001  |
| <b>CRP [mg/l], n (%)</b>                               |                         |                         |                         |                         | <0.001  |
| < 5                                                    | 7884 (29.1)             | 5262 (32.3)             | 1926 (25.3)             | 696 (21.9)              |         |
| 5-10                                                   | 2680 (9.9)              | 1560 (9.6)              | 775 (10.2)              | 345 (10.9)              |         |
| 10-50                                                  | 6070 (22.4)             | 3500 (21.5)             | 1743 (22.9)             | 827 (26.1)              |         |
| >50                                                    | 6116 (22.6)             | 3492 (21.4)             | 1737 (22.8)             | 887 (28.0)              |         |
| Missing                                                | 4342 (16.0)             | 2492 (15.3)             | 1432 (18.8)             | 418 (13.2)              |         |
| <b>Temperature [°C], median [IQR]</b>                  | 36.55 [36.25, 36.90]    | 36.55 [36.23, 36.90]    | 36.55 [36.23, 36.90]    | 36.60 [36.30, 36.92]    | <0.001  |
| <b>Systolic blood pressure [mmHg], mean (±SD)</b>      | 134.14 (19.77)          | 134.73 (20.04)          | 133.44 (19.22)          | 132.97 (19.67)          | <0.001  |
| <b>Diastolic blood pressure [mmHg], mean (±SD)</b>     | 71.89 (11.67)           | 72.36 (12.07)           | 71.40 (11.12)           | 70.85 (10.94)           | <0.001  |
| <b>BMI, mean (±SD)</b>                                 | 26.10 (5.25)            | 26.11 (5.10)            | 26.06 (5.28)            | 26.14 (5.85)            | 0.806   |
| <b>Polymedication, mean (±SD)</b>                      | 7.58 (3.84)             | 6.36 (3.37)             | 8.45 (3.65)             | 10.70 (3.83)            | <0.001  |
| <b>ACH burden per scale, mean (±SD)</b>                | -                       | 0.00 (0.00)             | 1.35 (0.48)             | 4.24 (1.87)             | <0.001  |

| Supplementary Table S3: Table 1's categorical approach |                         |                         |                         |                         |         |
|--------------------------------------------------------|-------------------------|-------------------------|-------------------------|-------------------------|---------|
|                                                        | Overall                 | SCDL No Burden          | SCDL Low Burden         | SCDL High Burden        | p-value |
| <b>n</b>                                               | 27092                   | 17518                   | 6272                    | 3302                    |         |
| <b>Died, n (%)</b>                                     | 913 (3.4)               | 527 (3.0)               | 150 (2.4)               | 236 (7.1)               | <0.001  |
| <b>Length of stay, median days [IQR]</b>               | 6.00 [4.00, 10.00]      | 6.00 [4.00, 10.00]      | 6.00 [4.00, 10.00]      | 7.00 [4.00, 11.00]      | <0.001  |
| <b>Age, mean years (±SD)</b>                           | 78.08 (7.69)            | 77.96 (7.68)            | 78.81 (7.61)            | 77.33 (7.77)            | <0.001  |
| <b>Age, n (%)</b>                                      |                         |                         |                         |                         | <0.001  |
| 65-75 years                                            | 10932 (40.4)            | 7211 (41.2)             | 2262 (36.1)             | 1459 (44.2)             |         |
| 76-85 years                                            | 11012 (40.6)            | 7013 (40.0)             | 2712 (43.2)             | 1287 (39.0)             |         |
| 86-95 years                                            | 4958 (18.3)             | 3186 (18.2)             | 1241 (19.8)             | 531 (16.1)              |         |
| >95 years                                              | 190 (0.7)               | 108 (0.6)               | 57 (0.9)                | 25 (0.8)                |         |
| <b>Female sex, n (%)</b>                               | 14014 (51.7)            | 9155 (52.3)             | 2995 (47.8)             | 1864 (56.5)             | <0.001  |
| <b>Department, n (%)</b>                               |                         |                         |                         |                         |         |
| Medical department                                     | 15119 (55.8)            | 9638 (55.0)             | 3950 (63.0)             | 1531 (46.4)             | <0.001  |
| Surgical department                                    | 11973 (44.2)            | 7880 (45.0)             | 2322 (37.0)             | 1771 (53.6)             |         |
| <b>Hearing device, n (%)</b>                           |                         |                         |                         |                         | <0.001  |
| None                                                   | 15674 (57.9)            | 9853 (56.2)             | 3720 (59.3)             | 2101 (63.6)             |         |
| Hearing device                                         | 2976 (11.0)             | 1832 (10.5)             | 789 (12.6)              | 355 (10.8)              |         |
| Missing                                                | 8442 (31.2)             | 5833 (33.3)             | 1763 (28.1)             | 846 (25.6)              |         |
| <b>Visual aid, n (%)</b>                               |                         |                         |                         |                         | <0.001  |
| None                                                   | 4956 (18.3)             | 3124 (17.8)             | 1155 (18.4)             | 677 (20.5)              |         |
| Glasses or contacts                                    | 13630 (50.3)            | 8520 (48.6)             | 3336 (53.2)             | 1774 (53.7)             |         |
| Missing                                                | 8506 (31.4)             | 5874 (33.5)             | 1781 (28.4)             | 851 (25.8)              |         |
| <b>Acute myocardial infarction, n (%)</b>              | 1442 (5.3)              | 738 (4.2)               | 551 (8.8)               | 153 (4.6)               | <0.001  |
| <b>Congestive heart failure, n (%)</b>                 | 4751 (17.5)             | 3001 (17.1)             | 1255 (20.0)             | 495 (15.0)              | <0.001  |
| <b>Peripheal vascular disease, n (%)</b>               | 3691 (13.6)             | 1808 (10.3)             | 1395 (22.2)             | 488 (14.8)              | <0.001  |
| <b>Cerebrovascular disease, n (%)</b>                  | 3462 (12.8)             | 2198 (12.5)             | 980 (15.6)              | 284 (8.6)               | <0.001  |
| <b>Dementia, n (%)</b>                                 | 2595 (9.6)              | 1705 (9.7)              | 646 (10.3)              | 244 (7.4)               | <0.001  |
| <b>COPD, n (%)</b>                                     | 3041 (11.2)             | 1667 (9.5)              | 884 (14.1)              | 490 (14.8)              | <0.001  |
| <b>Rheumatoid disease, n (%)</b>                       | 798 (2.9)               | 310 (1.8)               | 282 (4.5)               | 206 (6.2)               | <0.001  |
| <b>Peptic ulcer disease, n (%)</b>                     | 542 (2.0)               | 384 (2.2)               | 110 (1.8)               | 48 (1.5)                | 0.006   |
| <b>Liverdisease, n (%)</b>                             | 541 (2.0)               | 420 (2.4)               | 84 (1.3)                | 37 (1.1)                | <0.001  |
| <b>Diabetes, n (%)</b>                                 | 5692 (21.0)             | 3343 (19.1)             | 1659 (26.5)             | 690 (20.9)              | <0.001  |
| <b>Hemiplegia, Paraplegia, n (%)</b>                   | 1232 (4.5)              | 837 (4.8)               | 278 (4.4)               | 117 (3.5)               | 0.007   |
| <b>Renal dysfunction, n (%)</b>                        | 6176 (22.8)             | 3880 (22.1)             | 1666 (26.6)             | 630 (19.1)              | <0.001  |
| <b>Cancer, n (%)</b>                                   | 4625 (17.1)             | 3079 (17.6)             | 908 (14.5)              | 638 (19.3)              | <0.001  |
| <b>Delirium, n (%)</b>                                 | 1695 (6.3)              | 1187 (6.8)              | 366 (5.8)               | 142 (4.3)               | <0.001  |
| <b>Self-care Index, median [IQR]</b>                   | 39.00 [34.00, 40.00]    | 39.00 [35.00, 40.00]    | 39.00 [34.00, 40.00]    | 38.00 [33.00, 40.00]    | <0.001  |
| <b>Braden, median [IQR]</b>                            | 22.00 [20.00, 23.00]    | 22.00 [20.00, 23.00]    | 22.00 [20.00, 23.00]    | 22.00 [19.00, 23.00]    | <0.001  |
| <b>Nutrition deficiency score, median [IQR]</b>        | 1.00 [1.00, 2.00]       | 1.00 [1.00, 2.00]       | 1.00 [1.00, 2.00]       | 1.00 [1.00, 2.00]       | <0.001  |
| <b>Catheterisation, n (%)</b>                          | 7873 (29.1)             | 5358 (30.6)             | 1475 (23.5)             | 1040 (31.5)             | <0.001  |
| <b>Surgery during stay, n (%)</b>                      | 8676 (32.0)             | 5774 (33.0)             | 1549 (24.7)             | 1353 (41.0)             | <0.001  |
| <b>GFR [ml/min], median [IQR]</b>                      | 64.00 [45.00, 80.00]    | 64.00 [45.00, 80.00]    | 61.00 [43.00, 78.00]    | 67.00 [48.00, 84.00]    | <0.001  |
| <b>Creatinine [µmol/l], median [IQR]</b>               | 87.00 [70.00, 115.50]   | 87.00 [70.00, 115.00]   | 90.50 [72.00, 120.00]   | 82.00 [66.00, 109.00]   | <0.001  |
| <b>Sodium [mmol/l], median [IQR]</b>                   | 138.00 [135.00, 140.00] | 138.00 [135.00, 140.00] | 138.00 [135.00, 140.00] | 138.00 [135.00, 140.00] | 0.014   |
| <b>Potassium [mmol/l], median [IQR]</b>                | 4.05 [3.80, 4.35]       | 4.00 [3.75, 4.30]       | 4.10 [3.80, 4.40]       | 4.10 [3.80, 4.40]       | <0.001  |
| <b>ALAT [U/l], median [IQR]</b>                        | 20.00 [14.00, 35.00]    | 21.00 [14.00, 36.00]    | 20.00 [14.00, 33.00]    | 20.00 [14.00, 34.00]    | 0.127   |
| <b>ASAT [U/l], median [IQR]</b>                        | 25.00 [20.00, 35.00]    | 26.00 [20.00, 36.00]    | 25.00 [20.00, 33.00]    | 25.00 [20.00, 34.38]    | <0.001  |
| <b>CRP [mg/l], median [IQR]</b>                        | 12.00 [2.70, 56.00]     | 11.10 [2.50, 53.00]     | 12.00 [2.40, 56.50]     | 18.50 [4.00, 68.50]     | <0.001  |
| <b>CRP [mg/l], n (%)</b>                               |                         |                         |                         |                         | <0.001  |
| < 5                                                    | 7884 (29.1)             | 5186 (29.6)             | 1997 (31.8)             | 701 (21.2)              |         |
| 5-10                                                   | 2680 (9.9)              | 1727 (9.9)              | 661 (10.5)              | 292 (8.8)               |         |
| 10-50                                                  | 6070 (22.4)             | 3823 (21.8)             | 1482 (23.6)             | 765 (23.2)              |         |
| >50                                                    | 6116 (22.6)             | 3781 (21.6)             | 1518 (24.2)             | 817 (24.7)              |         |
| Missing                                                | 4342 (16.0)             | 3001 (17.1)             | 614 (9.8)               | 727 (22.0)              |         |
| <b>Temperature [°C], median [IQR]</b>                  | 36.55 [36.25, 36.90]    | 36.55 [36.23, 36.90]    | 36.57 [36.25, 36.90]    | 36.58 [36.25, 36.90]    | 0.336   |
| <b>Systolic blood pressure [mmHg], mean (±SD)</b>      | 134.14 (19.77)          | 134.27 (20.21)          | 134.55 (18.78)          | 132.67 (19.32)          | <0.001  |
| <b>Diastolic blood pressure [mmHg], mean (±SD)</b>     | 71.89 (11.67)           | 72.60 (12.12)           | 70.71 (10.81)           | 70.69 (10.70)           | <0.001  |
| <b>BMI, mean (±SD)</b>                                 | 26.10 (5.25)            | 26.12 (5.28)            | 26.13 (5.20)            | 25.93 (5.22)            | 0.289   |
| <b>Polymedication, mean (±SD)</b>                      | 7.58 (3.84)             | 6.44 (3.51)             | 9.07 (3.52)             | 9.81 (3.89)             | <0.001  |
| <b>ACH burden per scale, mean (±SD)</b>                | -                       | 0.00 (0.00)             | 2.00 (0.04)             | 6.23 (4.47)             | <0.001  |

| Supplementary Table S3: Table 1's categorical approach |                         |                         |                         |                         |         |
|--------------------------------------------------------|-------------------------|-------------------------|-------------------------|-------------------------|---------|
|                                                        | Overall                 | PI No Burden            | PI Low Burden           | PI High Burden          | p-value |
| <b>n</b>                                               | 27092                   | 24893                   | 62                      | 2137                    |         |
| <b>Died, n (%)</b>                                     | 913 (3.4)               | 789 (3.2)               | 2 (3.2)                 | 122 (5.7)               | <0.001  |
| <b>Length of stay, median days [IQR]</b>               | 6.00 [4.00, 10.00]      | 6.00 [4.00, 10.00]      | 6.00 [4.00, 9.00]       | 7.00 [5.00, 12.00]      | <0.001  |
| <b>Age, mean years (±SD)</b>                           | 78.08 (7.69)            | 77.80 (7.64)            | 75.60 (7.51)            | 81.40 (7.49)            | <0.001  |
| <b>Age, n (%)</b>                                      |                         |                         |                         |                         | <0.001  |
| 65-75 years                                            | 10932 (40.4)            | 10394 (41.8)            | 31 (50.0)               | 507 (23.7)              |         |
| 76-85 years                                            | 11012 (40.6)            | 10042 (40.3)            | 24 (38.7)               | 946 (44.3)              |         |
| 86-95 years                                            | 4958 (18.3)             | 4296 (17.3)             | 7 (11.3)                | 655 (30.7)              |         |
| >95 years                                              | 190 (0.7)               | 161 (0.6)               | 0 (0.0)                 | 29 (1.4)                |         |
| <b>Female sex, n (%)</b>                               | 14014 (51.7)            | 12829 (51.5)            | 41 (66.1)               | 1144 (53.5)             | 0.016   |
| <b>Department, n (%)</b>                               |                         |                         |                         |                         |         |
| Medical department                                     | 15119 (55.8)            | 13624 (54.7)            | 43 (69.4)               | 1452 (67.9)             | <0.001  |
| Surgical department                                    | 11973 (44.2)            | 11269 (45.3)            | 19 (30.6)               | 685 (32.1)              |         |
| <b>Hearing device, n (%)</b>                           |                         |                         |                         |                         | 0.005   |
| None                                                   | 15674 (57.9)            | 14435 (58.0)            | 41 (66.1)               | 1198 (56.1)             |         |
| Hearing device                                         | 2976 (11.0)             | 2690 (10.8)             | 3 (4.8)                 | 283 (13.2)              |         |
| Missing                                                | 8442 (31.2)             | 7768 (31.2)             | 18 (29.0)               | 656 (30.7)              |         |
| <b>Visual aid, n (%)</b>                               |                         |                         |                         |                         | <0.001  |
| None                                                   | 4956 (18.3)             | 4443 (17.8)             | 19 (30.6)               | 494 (23.1)              |         |
| Glasses or contacts                                    | 13630 (50.3)            | 12619 (50.7)            | 23 (37.1)               | 988 (46.2)              |         |
| Missing                                                | 8506 (31.4)             | 7831 (31.5)             | 20 (32.3)               | 655 (30.7)              |         |
| <b>Acute myocardial infarction, n (%)</b>              | 1442 (5.3)              | 1348 (5.4)              | 1 (1.6)                 | 93 (4.4)                | 0.047   |
| <b>Congestive heart failure, n (%)</b>                 | 4751 (17.5)             | 4240 (17.0)             | 3 (4.8)                 | 508 (23.8)              | <0.001  |
| <b>Peripheal vascular disease, n (%)</b>               | 3691 (13.6)             | 3381 (13.6)             | 2 (3.2)                 | 308 (14.4)              | 0.032   |
| <b>Cerebrovascular disease, n (%)</b>                  | 3462 (12.8)             | 3148 (12.6)             | 1 (1.6)                 | 313 (14.6)              | 0.001   |
| <b>Dementia, n (%)</b>                                 | 2595 (9.6)              | 1796 (7.2)              | 8 (12.9)                | 791 (37.0)              | <0.001  |
| <b>COPD, n (%)</b>                                     | 3041 (11.2)             | 2808 (11.3)             | 2 (3.2)                 | 231 (10.8)              | 0.109   |
| <b>Rheumatoid disease, n (%)</b>                       | 798 (2.9)               | 746 (3.0)               | 0 (0.0)                 | 52 (2.4)                | 0.131   |
| <b>Peptic ulcer disease, n (%)</b>                     | 542 (2.0)               | 496 (2.0)               | 0 (0.0)                 | 46 (2.2)                | 0.466   |
| <b>Liverdisease, n (%)</b>                             | 541 (2.0)               | 507 (2.0)               | 1 (1.6)                 | 33 (1.5)                | 0.289   |
| <b>Diabetes, n (%)</b>                                 | 5692 (21.0)             | 5162 (20.7)             | 21 (33.9)               | 509 (23.8)              | <0.001  |
| <b>Hemiplegia, Paraplegia, n (%)</b>                   | 1232 (4.5)              | 1114 (4.5)              | 0 (0.0)                 | 118 (5.5)               | 0.019   |
| <b>Renal dysfunction, n (%)</b>                        | 6176 (22.8)             | 5506 (22.1)             | 9 (14.5)                | 661 (30.9)              | <0.001  |
| <b>Cancer, n (%)</b>                                   | 4625 (17.1)             | 4358 (17.5)             | 4 (6.5)                 | 263 (12.3)              | <0.001  |
| <b>Delirium, n (%)</b>                                 | 1695 (6.3)              | 1185 (4.8)              | 0 (0.0)                 | 510 (23.9)              | <0.001  |
| <b>Self-care Index, median [IQR]</b>                   | 39.00 [34.00, 40.00]    | 39.00 [35.00, 40.00]    | 35.00 [26.00, 40.00]    | 34.00 [26.25, 39.00]    | <0.001  |
| <b>Braden, median [IQR]</b>                            | 22.00 [20.00, 23.00]    | 22.00 [20.00, 23.00]    | 21.00 [17.50, 22.50]    | 20.00 [17.00, 22.00]    | <0.001  |
| <b>Nutrition deficiency score, median [IQR]</b>        | 1.00 [1.00, 2.00]       | 1.00 [1.00, 2.00]       | 1.00 [0.50, 2.00]       | 1.00 [1.00, 2.00]       | <0.001  |
| <b>Catheterisation, n (%)</b>                          | 7873 (29.1)             | 7084 (28.5)             | 22 (35.5)               | 767 (35.9)              | <0.001  |
| <b>Surgery during stay, n (%)</b>                      | 8676 (32.0)             | 8161 (32.8)             | 13 (21.0)               | 502 (23.5)              | <0.001  |
| <b>GFR [ml/min], median [IQR]</b>                      | 64.00 [45.00, 80.00]    | 64.00 [45.00, 81.00]    | 73.50 [52.25, 83.50]    | 59.00 [41.00, 77.00]    | <0.001  |
| <b>Creatinine [µmol/l], median [IQR]</b>               | 87.00 [70.00, 115.50]   | 87.00 [70.00, 115.00]   | 76.50 [64.75, 100.75]   | 91.00 [71.50, 120.00]   | <0.001  |
| <b>Sodium [mmol/l], median [IQR]</b>                   | 138.00 [135.00, 140.00] | 138.00 [135.00, 140.00] | 140.00 [137.00, 141.00] | 138.50 [136.00, 140.67] | <0.001  |
| <b>Potassium [mmol/l], median [IQR]</b>                | 4.05 [3.80, 4.35]       | 4.05 [3.80, 4.35]       | 4.10 [3.85, 4.35]       | 4.10 [3.75, 4.40]       | 0.329   |
| <b>ALAT [U/l], median [IQR]</b>                        | 20.00 [14.00, 35.00]    | 20.00 [14.00, 36.00]    | 13.50 [9.00, 28.00]     | 19.00 [12.00, 33.00]    | 0.001   |
| <b>ASAT [U/l], median [IQR]</b>                        | 25.00 [20.00, 35.00]    | 25.00 [20.00, 35.00]    | 21.00 [15.00, 30.00]    | 25.00 [20.00, 34.00]    | 0.002   |
| <b>CRP [mg/l], median [IQR]</b>                        | 12.00 [2.70, 56.00]     | 11.90 [2.50, 55.25]     | 8.45 [3.15, 44.25]      | 17.00 [3.90, 61.30]     | <0.001  |
| <b>CRP [mg/l], n (%)</b>                               |                         |                         |                         |                         | <0.001  |
| < 5                                                    | 7884 (29.1)             | 7358 (29.6)             | 19 (30.6)               | 507 (23.7)              |         |
| 5-10                                                   | 2680 (9.9)              | 2457 (9.9)              | 12 (19.4)               | 211 (9.9)               |         |
| 10-50                                                  | 6070 (22.4)             | 5523 (22.2)             | 12 (19.4)               | 535 (25.0)              |         |
| >50                                                    | 6116 (22.6)             | 5591 (22.5)             | 13 (21.0)               | 512 (24.0)              |         |
| Missing                                                | 4342 (16.0)             | 3964 (15.9)             | 6 (9.7)                 | 372 (17.4)              |         |
| <b>Temperature [°C], median [IQR]</b>                  | 36.55 [36.25, 36.90]    | 36.55 [36.23, 36.90]    | 36.80 [36.41, 37.09]    | 36.60 [36.30, 37.00]    | <0.001  |
| <b>Systolic blood pressure [mmHg], mean (±SD)</b>      | 134.14 (19.77)          | 134.33 (19.80)          | 129.61 (18.75)          | 132.14 (19.35)          | <0.001  |
| <b>Diastolic blood pressure [mmHg], mean (±SD)</b>     | 71.89 (11.67)           | 72.04 (11.70)           | 70.10 (11.60)           | 70.26 (11.23)           | <0.001  |
| <b>BMI, mean (±SD)</b>                                 | 26.10 (5.25)            | 26.15 (5.25)            | 26.95 (5.89)            | 25.40 (5.28)            | <0.001  |
| <b>Polymedication, mean (±SD)</b>                      | 7.58 (3.84)             | 7.37 (3.77)             | 9.19 (3.31)             | 9.63 (3.96)             | <0.001  |
| <b>ACH burden per scale, mean (±SD)</b>                | -                       | 0.00 (0.00)             | 3.75 (3.57)             | 1031.65 (771.93)        | <0.001  |

| Supplementary Table S3: Table 1's categorical approach |                         |                         |                         |                         |         |
|--------------------------------------------------------|-------------------------|-------------------------|-------------------------|-------------------------|---------|
|                                                        | Overall                 | CI No Burden            | CI Low Burden           | CI High Burden          | p-value |
| <b>n</b>                                               | 27092                   | 24913                   | 173                     | 2006                    |         |
| <b>Died, n (%)</b>                                     | 913 (3.4)               | 788 (3.2)               | 7 (4.0)                 | 118 (5.9)               | <0.001  |
| <b>Length of stay, median days [IQR]</b>               | 6.00 [4.00, 10.00]      | 6.00 [4.00, 10.00]      | 7.00 [5.00, 12.00]      | 7.00 [5.00, 11.00]      | <0.001  |
| <b>Age, mean years (±SD)</b>                           | 78.08 (7.69)            | 77.78 (7.64)            | 80.27 (6.93)            | 81.52 (7.51)            | <0.001  |
| <b>Age, n (%)</b>                                      |                         |                         |                         |                         | <0.001  |
| 65-75 years                                            | 10932 (40.4)            | 10422 (41.8)            | 42 (24.3)               | 468 (23.3)              |         |
| 76-85 years                                            | 11012 (40.6)            | 10037 (40.3)            | 94 (54.3)               | 881 (43.9)              |         |
| 86-95 years                                            | 4958 (18.3)             | 4296 (17.2)             | 34 (19.7)               | 628 (31.3)              |         |
| >95 years                                              | 190 (0.7)               | 158 (0.6)               | 3 (1.7)                 | 29 (1.4)                |         |
| <b>Female sex, n (%)</b>                               | 14014 (51.7)            | 12839 (51.5)            | 116 (67.1)              | 1059 (52.8)             | <0.001  |
| <b>Department, n (%)</b>                               |                         |                         |                         |                         |         |
| Medical department                                     | 15119 (55.8)            | 13629 (54.7)            | 118 (68.2)              | 1372 (68.4)             | <0.001  |
| Surgical department                                    | 11973 (44.2)            | 11284 (45.3)            | 55 (31.8)               | 634 (31.6)              |         |
| <b>Hearing device, n (%)</b>                           |                         |                         |                         |                         | 0.005   |
| None                                                   | 15674 (57.9)            | 14457 (58.0)            | 88 (50.9)               | 1129 (56.3)             |         |
| Hearing device                                         | 2976 (11.0)             | 2693 (10.8)             | 19 (11.0)               | 264 (13.2)              |         |
| Missing                                                | 8442 (31.2)             | 7763 (31.2)             | 66 (38.2)               | 613 (30.6)              |         |
| <b>Visual aid, n (%)</b>                               |                         |                         |                         |                         | <0.001  |
| None                                                   | 4956 (18.3)             | 4445 (17.8)             | 40 (23.1)               | 471 (23.5)              |         |
| Glasses or contacts                                    | 13630 (50.3)            | 12642 (50.7)            | 67 (38.7)               | 921 (45.9)              |         |
| Missing                                                | 8506 (31.4)             | 7826 (31.4)             | 66 (38.2)               | 614 (30.6)              |         |
| <b>Acute myocardial infarction, n (%)</b>              | 1442 (5.3)              | 1345 (5.4)              | 12 (6.9)                | 85 (4.2)                | 0.053   |
| <b>Congestive heart failure, n (%)</b>                 | 4751 (17.5)             | 4242 (17.0)             | 29 (16.8)               | 480 (23.9)              | <0.001  |
| <b>Peripheal vascular disease, n (%)</b>               | 3691 (13.6)             | 3387 (13.6)             | 19 (11.0)               | 285 (14.2)              | 0.444   |
| <b>Cerebrovascular disease, n (%)</b>                  | 3462 (12.8)             | 3140 (12.6)             | 28 (16.2)               | 294 (14.7)              | 0.012   |
| <b>Dementia, n (%)</b>                                 | 2595 (9.6)              | 1763 (7.1)              | 57 (32.9)               | 775 (38.6)              | <0.001  |
| <b>COPD, n (%)</b>                                     | 3041 (11.2)             | 2810 (11.3)             | 26 (15.0)               | 205 (10.2)              | 0.099   |
| <b>Rheumatoid disease, n (%)</b>                       | 798 (2.9)               | 747 (3.0)               | 3 (1.7)                 | 48 (2.4)                | 0.194   |
| <b>Peptic ulcer disease, n (%)</b>                     | 542 (2.0)               | 500 (2.0)               | 0 (0.0)                 | 42 (2.1)                | 0.163   |
| <b>Liverdisease, n (%)</b>                             | 541 (2.0)               | 504 (2.0)               | 3 (1.7)                 | 34 (1.7)                | 0.582   |
| <b>Diabetes, n (%)</b>                                 | 5692 (21.0)             | 5175 (20.8)             | 41 (23.7)               | 476 (23.7)              | 0.005   |
| <b>Hemiplegia, Paraplegia, n (%)</b>                   | 1232 (4.5)              | 1105 (4.4)              | 11 (6.4)                | 116 (5.8)               | 0.011   |
| <b>Renal dysfunction, n (%)</b>                        | 6176 (22.8)             | 5513 (22.1)             | 52 (30.1)               | 611 (30.5)              | <0.001  |
| <b>Cancer, n (%)</b>                                   | 4625 (17.1)             | 4354 (17.5)             | 25 (14.5)               | 246 (12.3)              | <0.001  |
| <b>Delirium, n (%)</b>                                 | 1695 (6.3)              | 1173 (4.7)              | 20 (11.6)               | 502 (25.0)              | <0.001  |
| <b>Self-care Index, median [IQR]</b>                   | 39.00 [34.00, 40.00]    | 39.00 [35.00, 40.00]    | 33.00 [26.00, 37.00]    | 33.00 [26.00, 39.00]    | <0.001  |
| <b>Braden, median [IQR]</b>                            | 22.00 [20.00, 23.00]    | 22.00 [20.00, 23.00]    | 19.00 [16.00, 21.50]    | 20.00 [17.00, 22.00]    | <0.001  |
| <b>Nutrition deficiency score, median [IQR]</b>        | 1.00 [1.00, 2.00]       | 1.00 [1.00, 2.00]       | 2.00 [1.00, 3.00]       | 1.00 [1.00, 2.00]       | <0.001  |
| <b>Catheterisation, n (%)</b>                          | 7873 (29.1)             | 7090 (28.5)             | 49 (28.3)               | 734 (36.6)              | <0.001  |
| <b>Surgery during stay, n (%)</b>                      | 8676 (32.0)             | 8170 (32.8)             | 39 (22.5)               | 467 (23.3)              | <0.001  |
| <b>GFR [ml/min], median [IQR]</b>                      | 64.00 [45.00, 80.00]    | 64.00 [45.00, 81.00]    | 63.50 [45.50, 84.00]    | 59.00 [41.00, 76.50]    | <0.001  |
| <b>Creatinine [µmol/l], median [IQR]</b>               | 87.00 [70.00, 115.50]   | 87.00 [70.00, 115.00]   | 81.00 [61.50, 104.50]   | 91.00 [72.00, 120.00]   | <0.001  |
| <b>Sodium [mmol/l], median [IQR]</b>                   | 138.00 [135.00, 140.00] | 138.00 [135.00, 140.00] | 137.50 [134.75, 140.00] | 138.50 [136.00, 141.00] | <0.001  |
| <b>Potassium [mmol/l], median [IQR]</b>                | 4.05 [3.80, 4.35]       | 4.05 [3.80, 4.35]       | 4.10 [3.78, 4.30]       | 4.10 [3.75, 4.40]       | 0.264   |
| <b>ALAT [U/l], median [IQR]</b>                        | 20.00 [14.00, 35.00]    | 20.00 [14.00, 35.88]    | 16.00 [9.25, 26.00]     | 19.00 [12.00, 33.50]    | <0.001  |
| <b>ASAT [U/l], median [IQR]</b>                        | 25.00 [20.00, 35.00]    | 25.00 [20.00, 35.00]    | 23.00 [19.00, 30.00]    | 25.00 [20.00, 34.50]    | 0.002   |
| <b>CRP [mg/l], median [IQR]</b>                        | 12.00 [2.70, 56.00]     | 11.80 [2.50, 55.05]     | 13.50 [3.00, 61.75]     | 17.70 [4.00, 62.02]     | <0.001  |
| <b>CRP [mg/l], n (%)</b>                               |                         |                         |                         |                         | <0.001  |
| < 5                                                    | 7884 (29.1)             | 7376 (29.6)             | 51 (29.5)               | 457 (22.8)              |         |
| 5-10                                                   | 2680 (9.9)              | 2460 (9.9)              | 17 (9.8)                | 203 (10.1)              |         |
| 10-50                                                  | 6070 (22.4)             | 5527 (22.2)             | 38 (22.0)               | 505 (25.2)              |         |
| >50                                                    | 6116 (22.6)             | 5593 (22.5)             | 44 (25.4)               | 479 (23.9)              |         |
| Missing                                                | 4342 (16.0)             | 3957 (15.9)             | 23 (13.3)               | 362 (18.0)              |         |
| <b>Temperature [°C], median [IQR]</b>                  | 36.55 [36.25, 36.90]    | 36.55 [36.23, 36.90]    | 36.60 [36.25, 36.90]    | 36.60 [36.30, 37.00]    | <0.001  |
| <b>Systolic blood pressure [mmHg], mean (±SD)</b>      | 134.14 (19.77)          | 134.34 (19.80)          | 131.88 (18.39)          | 131.94 (19.39)          | <0.001  |
| <b>Diastolic blood pressure [mmHg], mean (±SD)</b>     | 71.89 (11.67)           | 72.04 (11.70)           | 71.16 (10.99)           | 70.19 (11.27)           | <0.001  |
| <b>BMI, mean (±SD)</b>                                 | 26.10 (5.25)            | 26.15 (5.25)            | 25.38 (6.07)            | 25.37 (5.19)            | <0.001  |
| <b>Polymedication, mean (±SD)</b>                      | 7.58 (3.84)             | 7.38 (3.78)             | 9.53 (3.63)             | 9.57 (3.94)             | <0.001  |
| <b>ACH burden per scale, mean (±SD)</b>                | -                       | 0.00 (0.00)             | 20.00 (8.42)            | 340.20 (233.92)         | <0.001  |

| Supplementary Table S3: Table 1's categorical approach |                         |                         |                         |                         |         |
|--------------------------------------------------------|-------------------------|-------------------------|-------------------------|-------------------------|---------|
|                                                        | Overall                 | GABS No Burden          | GABS Low Burden         | GABS High Burden        | p-value |
| <b>n</b>                                               | 27092                   | 10057                   | 8529                    | 8506                    |         |
| <b>Died, n (%)</b>                                     | 913 (3.4)               | 265 (2.6)               | 222 (2.6)               | 426 (5.0)               | <0.001  |
| <b>Length of stay, median days [IQR]</b>               | 6.00 [4.00, 10.00]      | 6.00 [4.00, 10.00]      | 6.00 [4.00, 9.00]       | 7.00 [5.00, 11.00]      | <0.001  |
| <b>Age, mean years (±SD)</b>                           | 78.08 (7.69)            | 77.74 (7.62)            | 77.81 (7.66)            | 78.74 (7.74)            | <0.001  |
| <b>Age, n (%)</b>                                      |                         |                         |                         |                         | <0.001  |
| 65-75 years                                            | 10932 (40.4)            | 4226 (42.0)             | 3581 (42.0)             | 3125 (36.7)             |         |
| 76-85 years                                            | 11012 (40.6)            | 4076 (40.5)             | 3404 (39.9)             | 3532 (41.5)             |         |
| 86-95 years                                            | 4958 (18.3)             | 1694 (16.8)             | 1484 (17.4)             | 1780 (20.9)             |         |
| >95 years                                              | 190 (0.7)               | 61 (0.6)                | 60 (0.7)                | 69 (0.8)                |         |
| <b>Female sex, n (%)</b>                               | 14014 (51.7)            | 4802 (47.7)             | 4531 (53.1)             | 4681 (55.0)             | <0.001  |
| <b>Department, n (%)</b>                               |                         |                         |                         |                         |         |
| Medical department                                     | 15119 (55.8)            | 5700 (56.7)             | 4184 (49.1)             | 5235 (61.5)             | <0.001  |
| Surgical department                                    | 11973 (44.2)            | 4357 (43.3)             | 4345 (50.9)             | 3271 (38.5)             |         |
| <b>Hearing device, n (%)</b>                           |                         |                         |                         |                         | <0.001  |
| None                                                   | 15674 (57.9)            | 5241 (52.1)             | 5261 (61.7)             | 5172 (60.8)             |         |
| Hearing device                                         | 2976 (11.0)             | 974 (9.7)               | 1009 (11.8)             | 993 (11.7)              |         |
| Missing                                                | 8442 (31.2)             | 3842 (38.2)             | 2259 (26.5)             | 2341 (27.5)             |         |
| <b>Visual aid, n (%)</b>                               |                         |                         |                         |                         | <0.001  |
| None                                                   | 4956 (18.3)             | 1631 (16.2)             | 1607 (18.8)             | 1718 (20.2)             |         |
| Glasses or contacts                                    | 13630 (50.3)            | 4560 (45.3)             | 4637 (54.4)             | 4433 (52.1)             |         |
| Missing                                                | 8506 (31.4)             | 3866 (38.4)             | 2285 (26.8)             | 2355 (27.7)             |         |
| <b>Acute myocardial infarction, n (%)</b>              | 1442 (5.3)              | 608 (6.0)               | 416 (4.9)               | 418 (4.9)               | <0.001  |
| <b>Congestive heart failure, n (%)</b>                 | 4751 (17.5)             | 1453 (14.4)             | 1309 (15.3)             | 1989 (23.4)             | <0.001  |
| <b>Peripheal vascular disease, n (%)</b>               | 3691 (13.6)             | 1206 (12.0)             | 1174 (13.8)             | 1311 (15.4)             | <0.001  |
| <b>Cerebrovascular disease, n (%)</b>                  | 3462 (12.8)             | 1672 (16.6)             | 879 (10.3)              | 911 (10.7)              | <0.001  |
| <b>Dementia, n (%)</b>                                 | 2595 (9.6)              | 763 (7.6)               | 626 (7.3)               | 1206 (14.2)             | <0.001  |
| <b>COPD, n (%)</b>                                     | 3041 (11.2)             | 738 (7.3)               | 835 (9.8)               | 1468 (17.3)             | <0.001  |
| <b>Rheumatoid disease, n (%)</b>                       | 798 (2.9)               | 166 (1.7)               | 269 (3.2)               | 363 (4.3)               | <0.001  |
| <b>Peptic ulcer disease, n (%)</b>                     | 542 (2.0)               | 230 (2.3)               | 143 (1.7)               | 169 (2.0)               | 0.012   |
| <b>Liverdisease, n (%)</b>                             | 541 (2.0)               | 206 (2.0)               | 174 (2.0)               | 161 (1.9)               | 0.709   |
| <b>Diabetes, n (%)</b>                                 | 5692 (21.0)             | 1696 (16.9)             | 1820 (21.3)             | 2176 (25.6)             | <0.001  |
| <b>Hemiplegia, Paraplegia, n (%)</b>                   | 1232 (4.5)              | 597 (5.9)               | 264 (3.1)               | 371 (4.4)               | <0.001  |
| <b>Renal dysfunction, n (%)</b>                        | 6176 (22.8)             | 2025 (20.1)             | 1836 (21.5)             | 2315 (27.2)             | <0.001  |
| <b>Cancer, n (%)</b>                                   | 4625 (17.1)             | 1644 (16.3)             | 1548 (18.1)             | 1433 (16.8)             | 0.004   |
| <b>Delirium, n (%)</b>                                 | 1695 (6.3)              | 564 (5.6)               | 325 (3.8)               | 806 (9.5)               | <0.001  |
| <b>Self-care Index, median [IQR]</b>                   | 39.00 [34.00, 40.00]    | 40.00 [37.00, 40.00]    | 39.00 [35.00, 40.00]    | 37.00 [32.00, 40.00]    | <0.001  |
| <b>Braden, median [IQR]</b>                            | 22.00 [20.00, 23.00]    | 23.00 [21.00, 23.00]    | 22.00 [20.00, 23.00]    | 21.00 [18.00, 23.00]    | <0.001  |
| <b>Nutrition deficiency score, median [IQR]</b>        | 1.00 [1.00, 2.00]       | 1.00 [1.00, 1.00]       | 1.00 [1.00, 2.00]       | 1.00 [1.00, 2.00]       | <0.001  |
| <b>Catheterisation, n (%)</b>                          | 7873 (29.1)             | 2989 (29.7)             | 2383 (27.9)             | 2501 (29.4)             | 0.02    |
| <b>Surgery during stay, n (%)</b>                      | 8676 (32.0)             | 3260 (32.4)             | 3215 (37.7)             | 2201 (25.9)             | <0.001  |
| <b>GFR [ml/min], median [IQR]</b>                      | 64.00 [45.00, 80.00]    | 65.00 [46.00, 81.00]    | 63.00 [45.00, 80.00]    | 62.00 [43.88, 80.00]    | 0.001   |
| <b>Creatinine [µmol/l], median [IQR]</b>               | 87.00 [70.00, 115.50]   | 87.00 [71.00, 115.00]   | 87.00 [70.00, 114.00]   | 87.50 [69.00, 117.50]   | 0.534   |
| <b>Sodium [mmol/l], median [IQR]</b>                   | 138.00 [135.00, 140.00] | 138.00 [136.00, 140.00] | 138.00 [135.00, 140.00] | 138.00 [135.00, 140.00] | <0.001  |
| <b>Potassium [mmol/l], median [IQR]</b>                | 4.05 [3.80, 4.35]       | 4.05 [3.80, 4.30]       | 4.05 [3.75, 4.35]       | 4.05 [3.75, 4.40]       | 0.28    |
| <b>ALAT [U/l], median [IQR]</b>                        | 20.00 [14.00, 35.00]    | 21.00 [14.00, 38.00]    | 20.00 [14.00, 34.00]    | 20.00 [13.00, 34.00]    | 0.01    |
| <b>ASAT [U/l], median [IQR]</b>                        | 25.00 [20.00, 35.00]    | 26.00 [20.00, 36.00]    | 25.00 [20.00, 35.00]    | 25.00 [20.00, 35.00]    | 0.003   |
| <b>CRP [mg/l], median [IQR]</b>                        | 12.00 [2.70, 56.00]     | 8.70 [2.00, 47.46]      | 11.00 [2.40, 52.50]     | 19.00 [4.00, 67.00]     | <0.001  |
| <b>CRP [mg/l], n (%)</b>                               |                         |                         |                         |                         | <0.001  |
| < 5                                                    | 7884 (29.1)             | 3447 (34.3)             | 2454 (28.8)             | 1983 (23.3)             |         |
| 5-10                                                   | 2680 (9.9)              | 970 (9.6)               | 838 (9.8)               | 872 (10.3)              |         |
| 10-50                                                  | 6070 (22.4)             | 2002 (19.9)             | 1821 (21.4)             | 2247 (26.4)             |         |
| >50                                                    | 6116 (22.6)             | 2049 (20.4)             | 1770 (20.8)             | 2297 (27.0)             |         |
| Missing                                                | 4342 (16.0)             | 1589 (15.8)             | 1646 (19.3)             | 1107 (13.0)             |         |
| <b>Temperature [°C], median [IQR]</b>                  | 36.55 [36.25, 36.90]    | 36.50 [36.20, 36.90]    | 36.54 [36.20, 36.90]    | 36.60 [36.30, 36.95]    | <0.001  |
| <b>Systolic blood pressure [mmHg], mean (±SD)</b>      | 134.14 (19.77)          | 135.77 (20.96)          | 133.74 (18.86)          | 132.85 (19.26)          | <0.001  |
| <b>Diastolic blood pressure [mmHg], mean (±SD)</b>     | 71.89 (11.67)           | 73.41 (12.72)           | 71.50 (11.07)           | 70.72 (10.95)           | <0.001  |
| <b>BMI, mean (±SD)</b>                                 | 26.10 (5.25)            | 25.99 (4.91)            | 26.13 (5.12)            | 26.18 (5.72)            | 0.148   |
| <b>Polymedication, mean (±SD)</b>                      | 7.58 (3.84)             | 4.97 (2.79)             | 7.23 (3.11)             | 10.17 (3.63)            | <0.001  |
| <b>ACH burden per scale, mean (±SD)</b>                | -                       | 0.00 (0.00)             | 1.44 (0.50)             | 5.39 (2.86)             | <0.001  |

| Supplementary Table S3: Table 1's categorical approach |                         |                         |                         |                         |         |
|--------------------------------------------------------|-------------------------|-------------------------|-------------------------|-------------------------|---------|
|                                                        | Overall                 | DS No Burden            | DS Low Burden           | DS High Burden          | p-value |
| <b>n</b>                                               | 27092                   | 11404                   | 7898                    | 7790                    |         |
| <b>Died, n (%)</b>                                     | 913 (3.4)               | 281 (2.5)               | 196 (2.5)               | 436 (5.6)               | <0.001  |
| <b>Length of stay, median days [IQR]</b>               | 6.00 [4.00, 10.00]      | 6.00 [4.00, 9.00]       | 6.00 [4.00, 10.00]      | 7.00 [5.00, 12.00]      | <0.001  |
| <b>Age, mean years (±SD)</b>                           | 78.08 (7.69)            | 77.87 (7.59)            | 77.74 (7.63)            | 78.72 (7.84)            | <0.001  |
| <b>Age, n (%)</b>                                      |                         |                         |                         |                         | <0.001  |
| 65-75 years                                            | 10932 (40.4)            | 4697 (41.2)             | 3361 (42.6)             | 2874 (36.9)             |         |
| 76-85 years                                            | 11012 (40.6)            | 4672 (41.0)             | 3137 (39.7)             | 3203 (41.1)             |         |
| 86-95 years                                            | 4958 (18.3)             | 1966 (17.2)             | 1349 (17.1)             | 1643 (21.1)             |         |
| >95 years                                              | 190 (0.7)               | 69 (0.6)                | 51 (0.6)                | 70 (0.9)                |         |
| <b>Female sex, n (%)</b>                               | 14014 (51.7)            | 5426 (47.6)             | 4173 (52.8)             | 4415 (56.7)             | <0.001  |
| <b>Department, n (%)</b>                               |                         |                         |                         |                         |         |
| Medical department                                     | 15119 (55.8)            | 6450 (56.6)             | 3881 (49.1)             | 4788 (61.5)             | <0.001  |
| Surgical department                                    | 11973 (44.2)            | 4954 (43.4)             | 4017 (50.9)             | 3002 (38.5)             |         |
| <b>Hearing device, n (%)</b>                           |                         |                         |                         |                         | <0.001  |
| None                                                   | 15674 (57.9)            | 6084 (53.3)             | 4896 (62.0)             | 4694 (60.3)             |         |
| Hearing device                                         | 2976 (11.0)             | 1140 (10.0)             | 945 (12.0)              | 891 (11.4)              |         |
| Missing                                                | 8442 (31.2)             | 4180 (36.7)             | 2057 (26.0)             | 2205 (28.3)             |         |
| <b>Visual aid, n (%)</b>                               |                         |                         |                         |                         | <0.001  |
| None                                                   | 4956 (18.3)             | 1902 (16.7)             | 1468 (18.6)             | 1586 (20.4)             |         |
| Glasses or contacts                                    | 13630 (50.3)            | 5286 (46.4)             | 4362 (55.2)             | 3982 (51.1)             |         |
| Missing                                                | 8506 (31.4)             | 4216 (37.0)             | 2068 (26.2)             | 2222 (28.5)             |         |
| <b>Acute myocardial infarction, n (%)</b>              | 1442 (5.3)              | 751 (6.6)               | 356 (4.5)               | 335 (4.3)               | <0.001  |
| <b>Congestive heart failure, n (%)</b>                 | 4751 (17.5)             | 1654 (14.5)             | 1318 (16.7)             | 1779 (22.8)             | <0.001  |
| <b>Peripheal vascular disease, n (%)</b>               | 3691 (13.6)             | 1418 (12.4)             | 1147 (14.5)             | 1126 (14.5)             | <0.001  |
| <b>Cerebrovascular disease, n (%)</b>                  | 3462 (12.8)             | 1842 (16.2)             | 818 (10.4)              | 802 (10.3)              | <0.001  |
| <b>Dementia, n (%)</b>                                 | 2595 (9.6)              | 820 (7.2)               | 682 (8.6)               | 1093 (14.0)             | <0.001  |
| <b>COPD, n (%)</b>                                     | 3041 (11.2)             | 876 (7.7)               | 710 (9.0)               | 1455 (18.7)             | <0.001  |
| <b>Rheumatoid disease, n (%)</b>                       | 798 (2.9)               | 190 (1.7)               | 297 (3.8)               | 311 (4.0)               | <0.001  |
| <b>Peptic ulcer disease, n (%)</b>                     | 542 (2.0)               | 253 (2.2)               | 133 (1.7)               | 156 (2.0)               | 0.033   |
| <b>Liverdisease, n (%)</b>                             | 541 (2.0)               | 217 (1.9)               | 183 (2.3)               | 141 (1.8)               | 0.049   |
| <b>Diabetes, n (%)</b>                                 | 5692 (21.0)             | 1923 (16.9)             | 1994 (25.2)             | 1775 (22.8)             | <0.001  |
| <b>Hemiplegia, Paraplegia, n (%)</b>                   | 1232 (4.5)              | 627 (5.5)               | 262 (3.3)               | 343 (4.4)               | <0.001  |
| <b>Renal dysfunction, n (%)</b>                        | 6176 (22.8)             | 2369 (20.8)             | 1806 (22.9)             | 2001 (25.7)             | <0.001  |
| <b>Cancer, n (%)</b>                                   | 4625 (17.1)             | 1860 (16.3)             | 1489 (18.9)             | 1276 (16.4)             | <0.001  |
| <b>Delirium, n (%)</b>                                 | 1695 (6.3)              | 594 (5.2)               | 368 (4.7)               | 733 (9.4)               | <0.001  |
| <b>Self-care Index, median [IQR]</b>                   | 39.00 [34.00, 40.00]    | 40.00 [37.00, 40.00]    | 39.00 [35.00, 40.00]    | 36.00 [31.00, 40.00]    | <0.001  |
| <b>Braden, median [IQR]</b>                            | 22.00 [20.00, 23.00]    | 23.00 [21.00, 23.00]    | 22.00 [20.00, 23.00]    | 21.00 [18.00, 23.00]    | <0.001  |
| <b>Nutrition deficiency score, median [IQR]</b>        | 1.00 [1.00, 2.00]       | 1.00 [1.00, 1.00]       | 1.00 [1.00, 2.00]       | 1.00 [1.00, 2.00]       | <0.001  |
| <b>Catheterisation, n (%)</b>                          | 7873 (29.1)             | 3339 (29.3)             | 2241 (28.4)             | 2293 (29.4)             | 0.273   |
| <b>Surgery during stay, n (%)</b>                      | 8676 (32.0)             | 3673 (32.2)             | 2928 (37.1)             | 2075 (26.6)             | <0.001  |
| <b>GFR [ml/min], median [IQR]</b>                      | 64.00 [45.00, 80.00]    | 64.00 [46.00, 80.00]    | 63.00 [45.00, 80.00]    | 63.00 [44.00, 81.00]    | 0.653   |
| <b>Creatinine [µmol/l], median [IQR]</b>               | 87.00 [70.00, 115.50]   | 88.00 [71.00, 115.00]   | 87.00 [70.50, 115.50]   | 86.00 [68.00, 116.00]   | <0.001  |
| <b>Sodium [mmol/l], median [IQR]</b>                   | 138.00 [135.00, 140.00] | 138.00 [136.00, 140.00] | 138.00 [135.00, 140.00] | 138.00 [135.00, 140.00] | <0.001  |
| <b>Potassium [mmol/l], median [IQR]</b>                | 4.05 [3.80, 4.35]       | 4.05 [3.80, 4.35]       | 4.05 [3.75, 4.35]       | 4.05 [3.75, 4.40]       | 0.231   |
| <b>ALAT [U/l], median [IQR]</b>                        | 20.00 [14.00, 35.00]    | 20.50 [14.00, 36.00]    | 20.00 [14.00, 34.00]    | 20.00 [13.00, 35.00]    | 0.077   |
| <b>ASAT [U/l], median [IQR]</b>                        | 25.00 [20.00, 35.00]    | 25.00 [20.00, 35.00]    | 25.00 [20.00, 35.00]    | 25.00 [20.00, 35.00]    | 0.051   |
| <b>CRP [mg/l], median [IQR]</b>                        | 12.00 [2.70, 56.00]     | 7.50 [2.00, 41.00]      | 12.25 [2.60, 58.50]     | 21.80 [5.00, 70.00]     | <0.001  |
| <b>CRP [mg/l], n (%)</b>                               |                         |                         |                         |                         | <0.001  |
| < 5                                                    | 7884 (29.1)             | 4033 (35.4)             | 2209 (28.0)             | 1642 (21.1)             |         |
| 5-10                                                   | 2680 (9.9)              | 1120 (9.8)              | 800 (10.1)              | 760 (9.8)               |         |
| 10-50                                                  | 6070 (22.4)             | 2269 (19.9)             | 1705 (21.6)             | 2096 (26.9)             |         |
| >50                                                    | 6116 (22.6)             | 2120 (18.6)             | 1787 (22.6)             | 2209 (28.4)             |         |
| Missing                                                | 4342 (16.0)             | 1862 (16.3)             | 1397 (17.7)             | 1083 (13.9)             |         |
| <b>Temperature [°C], median [IQR]</b>                  | 36.55 [36.25, 36.90]    | 36.50 [36.20, 36.90]    | 36.55 [36.23, 36.90]    | 36.60 [36.30, 37.00]    | <0.001  |
| <b>Systolic blood pressure [mmHg], mean (±SD)</b>      | 134.14 (19.77)          | 136.02 (20.77)          | 133.65 (18.68)          | 132.18 (19.27)          | <0.001  |
| <b>Diastolic blood pressure [mmHg], mean (±SD)</b>     | 71.89 (11.67)           | 73.36 (12.55)           | 71.46 (10.92)           | 70.42 (10.99)           | <0.001  |
| <b>BMI, mean (±SD)</b>                                 | 26.10 (5.25)            | 26.09 (4.92)            | 26.25 (5.16)            | 25.93 (5.77)            | 0.007   |
| <b>Polymedication, mean (±SD)</b>                      | 7.58 (3.84)             | 5.38 (2.97)             | 7.62 (3.34)             | 9.98 (3.74)             | <0.001  |
| <b>ACH burden per scale, mean (±SD)</b>                | -                       | 0.00 (0.00)             | 1.32 (0.72)             | 7.13 (4.24)             | <0.001  |



| Supplementary Table S3: Table 1's categorical approach |                         |                         |                         |                         |         |
|--------------------------------------------------------|-------------------------|-------------------------|-------------------------|-------------------------|---------|
|                                                        | Overall                 | BAADS No Burden         | BAADS Low Burden        | BAADS High Burden       | p-value |
| <b>n</b>                                               | 27092                   | 11257                   | 7692                    | 8143                    |         |
| <b>Died, n (%)</b>                                     | 913 (3.4)               | 276 (2.5)               | 197 (2.6)               | 440 (5.4)               | <0.001  |
| <b>Length of stay, median days [IQR]</b>               | 6.00 [4.00, 10.00]      | 6.00 [4.00, 10.00]      | 6.00 [4.00, 10.00]      | 7.00 [5.00, 11.00]      | <0.001  |
| <b>Age, mean years (±SD)</b>                           | 78.08 (7.69)            | 77.54 (7.59)            | 77.99 (7.68)            | 78.91 (7.76)            | <0.001  |
| <b>Age, n (%)</b>                                      |                         |                         |                         |                         | <0.001  |
| 65-75 years                                            | 10932 (40.4)            | 4873 (43.3)             | 3148 (40.9)             | 2911 (35.7)             |         |
| 76-85 years                                            | 11012 (40.6)            | 4485 (39.8)             | 3092 (40.2)             | 3435 (42.2)             |         |
| 86-95 years                                            | 4958 (18.3)             | 1836 (16.3)             | 1395 (18.1)             | 1727 (21.2)             |         |
| >95 years                                              | 190 (0.7)               | 63 (0.6)                | 57 (0.7)                | 70 (0.9)                |         |
| <b>Female sex, n (%)</b>                               | 14014 (51.7)            | 5326 (47.3)             | 4140 (53.8)             | 4548 (55.9)             | <0.001  |
| <b>Department, n (%)</b>                               |                         |                         |                         |                         |         |
| Medical department                                     | 15119 (55.8)            | 6138 (54.5)             | 3662 (47.6)             | 5319 (65.3)             | <0.001  |
| Surgical department                                    | 11973 (44.2)            | 5119 (45.5)             | 4030 (52.4)             | 2824 (34.7)             |         |
| <b>Hearing device, n (%)</b>                           |                         |                         |                         |                         | <0.001  |
| None                                                   | 15674 (57.9)            | 6028 (53.5)             | 4761 (61.9)             | 4885 (60.0)             |         |
| Hearing device                                         | 2976 (11.0)             | 1117 (9.9)              | 931 (12.1)              | 928 (11.4)              |         |
| Missing                                                | 8442 (31.2)             | 4112 (36.5)             | 2000 (26.0)             | 2330 (28.6)             |         |
| <b>Visual aid, n (%)</b>                               |                         |                         |                         |                         | <0.001  |
| None                                                   | 4956 (18.3)             | 1881 (16.7)             | 1418 (18.4)             | 1657 (20.3)             |         |
| Glasses or contacts                                    | 13630 (50.3)            | 5242 (46.6)             | 4239 (55.1)             | 4149 (51.0)             |         |
| Missing                                                | 8506 (31.4)             | 4134 (36.7)             | 2035 (26.5)             | 2337 (28.7)             |         |
| <b>Acute myocardial infarction, n (%)</b>              | 1442 (5.3)              | 645 (5.7)               | 398 (5.2)               | 399 (4.9)               | 0.031   |
| <b>Congestive heart failure, n (%)</b>                 | 4751 (17.5)             | 1556 (13.8)             | 1209 (15.7)             | 1986 (24.4)             | <0.001  |
| <b>Peripheal vascular disease, n (%)</b>               | 3691 (13.6)             | 1361 (12.1)             | 1064 (13.8)             | 1266 (15.5)             | <0.001  |
| <b>Cerebrovascular disease, n (%)</b>                  | 3462 (12.8)             | 1801 (16.0)             | 774 (10.1)              | 887 (10.9)              | <0.001  |
| <b>Dementia, n (%)</b>                                 | 2595 (9.6)              | 833 (7.4)               | 637 (8.3)               | 1125 (13.8)             | <0.001  |
| <b>COPD, n (%)</b>                                     | 3041 (11.2)             | 802 (7.1)               | 569 (7.4)               | 1670 (20.5)             | <0.001  |
| <b>Rheumatoid disease, n (%)</b>                       | 798 (2.9)               | 185 (1.6)               | 262 (3.4)               | 351 (4.3)               | <0.001  |
| <b>Peptic ulcer disease, n (%)</b>                     | 542 (2.0)               | 237 (2.1)               | 122 (1.6)               | 183 (2.2)               | 0.007   |
| <b>Liverdisease, n (%)</b>                             | 541 (2.0)               | 225 (2.0)               | 171 (2.2)               | 145 (1.8)               | 0.138   |
| <b>Diabetes, n (%)</b>                                 | 5692 (21.0)             | 2236 (19.9)             | 1602 (20.8)             | 1854 (22.8)             | <0.001  |
| <b>Hemiplegia, Paraplegia, n (%)</b>                   | 1232 (4.5)              | 638 (5.7)               | 237 (3.1)               | 357 (4.4)               | <0.001  |
| <b>Renal dysfunction, n (%)</b>                        | 6176 (22.8)             | 2177 (19.3)             | 1719 (22.3)             | 2280 (28.0)             | <0.001  |
| <b>Cancer, n (%)</b>                                   | 4625 (17.1)             | 1826 (16.2)             | 1399 (18.2)             | 1400 (17.2)             | 0.002   |
| <b>Delirium, n (%)</b>                                 | 1695 (6.3)              | 593 (5.3)               | 343 (4.5)               | 759 (9.3)               | <0.001  |
| <b>Self-care Index, median [IQR]</b>                   | 39.00 [34.00, 40.00]    | 40.00 [37.00, 40.00]    | 39.00 [35.00, 40.00]    | 37.00 [31.00, 40.00]    | <0.001  |
| <b>Braden, median [IQR]</b>                            | 22.00 [20.00, 23.00]    | 23.00 [21.00, 23.00]    | 22.00 [20.00, 23.00]    | 21.00 [18.00, 23.00]    | <0.001  |
| <b>Nutrition deficiency score, median [IQR]</b>        | 1.00 [1.00, 2.00]       | 1.00 [1.00, 1.00]       | 1.00 [1.00, 2.00]       | 1.00 [1.00, 2.00]       | <0.001  |
| <b>Catheterisation, n (%)</b>                          | 7873 (29.1)             | 3390 (30.1)             | 2215 (28.8)             | 2268 (27.9)             | 0.002   |
| <b>Surgery during stay, n (%)</b>                      | 8676 (32.0)             | 3860 (34.3)             | 2948 (38.3)             | 1868 (22.9)             | <0.001  |
| <b>GFR [ml/min], median [IQR]</b>                      | 64.00 [45.00, 80.00]    | 65.00 [47.00, 81.00]    | 63.00 [45.00, 80.00]    | 62.00 [43.00, 80.00]    | <0.001  |
| <b>Creatinine [µmol/l], median [IQR]</b>               | 87.00 [70.00, 115.50]   | 87.00 [71.00, 113.00]   | 87.00 [70.00, 116.00]   | 88.00 [69.00, 118.00]   | 0.923   |
| <b>Sodium [mmol/l], median [IQR]</b>                   | 138.00 [135.00, 140.00] | 138.00 [136.00, 140.00] | 138.00 [135.00, 140.00] | 138.00 [135.00, 140.00] | <0.001  |
| <b>Potassium [mmol/l], median [IQR]</b>                | 4.05 [3.80, 4.35]       | 4.05 [3.80, 4.30]       | 4.05 [3.75, 4.39]       | 4.05 [3.75, 4.40]       | 0.99    |
| <b>ALAT [U/l], median [IQR]</b>                        | 20.00 [14.00, 35.00]    | 21.00 [14.00, 37.00]    | 20.00 [14.00, 34.00]    | 20.00 [13.00, 35.00]    | 0.028   |
| <b>ASAT [U/l], median [IQR]</b>                        | 25.00 [20.00, 35.00]    | 25.00 [20.00, 35.00]    | 25.00 [20.00, 35.00]    | 25.00 [20.00, 35.00]    | 0.17    |
| <b>CRP [mg/l], median [IQR]</b>                        | 12.00 [2.70, 56.00]     | 8.90 [2.00, 47.20]      | 10.90 [2.40, 50.50]     | 20.00 [4.40, 69.00]     | <0.001  |
| <b>CRP [mg/l], n (%)</b>                               |                         |                         |                         |                         | <0.001  |
| < 5                                                    | 7884 (29.1)             | 3811 (33.9)             | 2204 (28.7)             | 1869 (23.0)             |         |
| 5-10                                                   | 2680 (9.9)              | 1064 (9.5)              | 786 (10.2)              | 830 (10.2)              |         |
| 10-50                                                  | 6070 (22.4)             | 2255 (20.0)             | 1644 (21.4)             | 2171 (26.7)             |         |
| >50                                                    | 6116 (22.6)             | 2257 (20.0)             | 1555 (20.2)             | 2304 (28.3)             |         |
| Missing                                                | 4342 (16.0)             | 1870 (16.6)             | 1503 (19.5)             | 969 (11.9)              |         |
| <b>Temperature [°C], median [IQR]</b>                  | 36.55 [36.25, 36.90]    | 36.50 [36.20, 36.90]    | 36.50 [36.20, 36.85]    | 36.60 [36.30, 37.00]    | <0.001  |
| <b>Systolic blood pressure [mmHg], mean (±SD)</b>      | 134.14 (19.77)          | 135.64 (20.53)          | 133.90 (19.03)          | 132.52 (19.36)          | <0.001  |
| <b>Diastolic blood pressure [mmHg], mean (±SD)</b>     | 71.89 (11.67)           | 73.24 (12.44)           | 71.48 (11.13)           | 70.64 (11.02)           | <0.001  |
| <b>BMI, mean (±SD)</b>                                 | 26.10 (5.25)            | 26.12 (4.94)            | 26.15 (5.11)            | 26.01 (5.75)            | 0.358   |
| <b>Polymedication, mean (±SD)</b>                      | 7.58 (3.84)             | 5.26 (2.90)             | 7.48 (3.20)             | 10.09 (3.71)            | <0.001  |
| <b>ACH burden per scale, mean (±SD)</b>                | -                       | 0.00 (0.00)             | 1.39 (0.49)             | 6.13 (3.75)             | <0.001  |

| Supplementary Table S3: Table 1's categorical approach |                         |                         |                         |                         |         |
|--------------------------------------------------------|-------------------------|-------------------------|-------------------------|-------------------------|---------|
|                                                        | Overall                 | KABS No Burden          | KABS Low Burden         | KABS High Burden        | p-value |
| <b>n</b>                                               | 27092                   | 14287                   | 7129                    | 5676                    |         |
| <b>Died, n (%)</b>                                     | 913 (3.4)               | 366 (2.6)               | 231 (3.2)               | 316 (5.6)               | <0.001  |
| <b>Length of stay, median days [IQR]</b>               | 6.00 [4.00, 10.00]      | 6.00 [4.00, 10.00]      | 7.00 [4.00, 10.00]      | 7.00 [5.00, 12.00]      | <0.001  |
| <b>Age, mean years (±SD)</b>                           | 78.08 (7.69)            | 77.64 (7.56)            | 78.24 (7.75)            | 78.97 (7.83)            | <0.001  |
| <b>Age, n (%)</b>                                      |                         |                         |                         |                         | <0.001  |
| 65-75 years                                            | 10932 (40.4)            | 6094 (42.7)             | 2805 (39.3)             | 2033 (35.8)             |         |
| 76-85 years                                            | 11012 (40.6)            | 5771 (40.4)             | 2889 (40.5)             | 2352 (41.4)             |         |
| 86-95 years                                            | 4958 (18.3)             | 2334 (16.3)             | 1386 (19.4)             | 1238 (21.8)             |         |
| >95 years                                              | 190 (0.7)               | 88 (0.6)                | 49 (0.7)                | 53 (0.9)                |         |
| <b>Female sex, n (%)</b>                               | 14014 (51.7)            | 6770 (47.4)             | 4032 (56.6)             | 3212 (56.6)             | <0.001  |
| <b>Department, n (%)</b>                               |                         |                         |                         |                         |         |
| Medical department                                     | 15119 (55.8)            | 7981 (55.9)             | 3751 (52.6)             | 3387 (59.7)             | <0.001  |
| Surgical department                                    | 11973 (44.2)            | 6306 (44.1)             | 3378 (47.4)             | 2289 (40.3)             |         |
| <b>Hearing device, n (%)</b>                           |                         |                         |                         |                         | <0.001  |
| None                                                   | 15674 (57.9)            | 7858 (55.0)             | 4363 (61.2)             | 3453 (60.8)             |         |
| Hearing device                                         | 2976 (11.0)             | 1452 (10.2)             | 867 (12.2)              | 657 (11.6)              |         |
| Missing                                                | 8442 (31.2)             | 4977 (34.8)             | 1899 (26.6)             | 1566 (27.6)             |         |
| <b>Visual aid, n (%)</b>                               |                         |                         |                         |                         | <0.001  |
| None                                                   | 4956 (18.3)             | 2476 (17.3)             | 1298 (18.2)             | 1182 (20.8)             |         |
| Glasses or contacts                                    | 13630 (50.3)            | 6796 (47.6)             | 3913 (54.9)             | 2921 (51.5)             |         |
| Missing                                                | 8506 (31.4)             | 5015 (35.1)             | 1918 (26.9)             | 1573 (27.7)             |         |
| <b>Acute myocardial infarction, n (%)</b>              | 1442 (5.3)              | 864 (6.0)               | 310 (4.3)               | 268 (4.7)               | <0.001  |
| <b>Congestive heart failure, n (%)</b>                 | 4751 (17.5)             | 2047 (14.3)             | 1373 (19.3)             | 1331 (23.4)             | <0.001  |
| <b>Peripheal vascular disease, n (%)</b>               | 3691 (13.6)             | 1860 (13.0)             | 991 (13.9)              | 840 (14.8)              | 0.003   |
| <b>Cerebrovascular disease, n (%)</b>                  | 3462 (12.8)             | 2115 (14.8)             | 701 (9.8)               | 646 (11.4)              | <0.001  |
| <b>Dementia, n (%)</b>                                 | 2595 (9.6)              | 1000 (7.0)              | 653 (9.2)               | 942 (16.6)              | <0.001  |
| <b>COPD, n (%)</b>                                     | 3041 (11.2)             | 1252 (8.8)              | 974 (13.7)              | 815 (14.4)              | <0.001  |
| <b>Rheumatoid disease, n (%)</b>                       | 798 (2.9)               | 233 (1.6)               | 316 (4.4)               | 249 (4.4)               | <0.001  |
| <b>Peptic ulcer disease, n (%)</b>                     | 542 (2.0)               | 306 (2.1)               | 113 (1.6)               | 123 (2.2)               | 0.014   |
| <b>Liverdisease, n (%)</b>                             | 541 (2.0)               | 278 (1.9)               | 153 (2.1)               | 110 (1.9)               | 0.576   |
| <b>Diabetes, n (%)</b>                                 | 5692 (21.0)             | 2973 (20.8)             | 1442 (20.2)             | 1277 (22.5)             | 0.005   |
| <b>Hemiplegia, Paraplegia, n (%)</b>                   | 1232 (4.5)              | 725 (5.1)               | 248 (3.5)               | 259 (4.6)               | <0.001  |
| <b>Renal dysfunction, n (%)</b>                        | 6176 (22.8)             | 2982 (20.9)             | 1697 (23.8)             | 1497 (26.4)             | <0.001  |
| <b>Cancer, n (%)</b>                                   | 4625 (17.1)             | 2366 (16.6)             | 1270 (17.8)             | 989 (17.4)              | 0.052   |
| <b>Delirium, n (%)</b>                                 | 1695 (6.3)              | 689 (4.8)               | 369 (5.2)               | 637 (11.2)              | <0.001  |
| <b>Self-care Index, median [IQR]</b>                   | 39.00 [34.00, 40.00]    | 40.00 [36.00, 40.00]    | 39.00 [34.00, 40.00]    | 36.00 [31.00, 40.00]    | <0.001  |
| <b>Braden, median [IQR]</b>                            | 22.00 [20.00, 23.00]    | 23.00 [21.00, 23.00]    | 22.00 [20.00, 23.00]    | 21.00 [18.00, 23.00]    | <0.001  |
| <b>Nutrition deficiency score, median [IQR]</b>        | 1.00 [1.00, 2.00]       | 1.00 [1.00, 1.00]       | 1.00 [1.00, 2.00]       | 1.00 [1.00, 2.00]       | <0.001  |
| <b>Catheterisation, n (%)</b>                          | 7873 (29.1)             | 4015 (28.1)             | 2052 (28.8)             | 1806 (31.8)             | <0.001  |
| <b>Surgery during stay, n (%)</b>                      | 8676 (32.0)             | 4633 (32.4)             | 2535 (35.6)             | 1508 (26.6)             | <0.001  |
| <b>GFR [ml/min], median [IQR]</b>                      | 64.00 [45.00, 80.00]    | 65.00 [46.00, 80.92]    | 63.00 [44.50, 80.00]    | 62.00 [43.00, 80.00]    | 0.001   |
| <b>Creatinine [µmol/l], median [IQR]</b>               | 87.00 [70.00, 115.50]   | 87.42 [71.00, 115.00]   | 87.00 [69.50, 115.00]   | 87.00 [69.00, 117.00]   | 0.016   |
| <b>Sodium [mmol/l], median [IQR]</b>                   | 138.00 [135.00, 140.00] | 138.00 [135.50, 140.00] | 138.00 [135.00, 140.00] | 138.00 [135.00, 140.00] | 0.103   |
| <b>Potassium [mmol/l], median [IQR]</b>                | 4.05 [3.80, 4.35]       | 4.05 [3.80, 4.35]       | 4.05 [3.80, 4.35]       | 4.10 [3.75, 4.40]       | 0.138   |
| <b>ALAT [U/l], median [IQR]</b>                        | 20.00 [14.00, 35.00]    | 21.00 [14.00, 37.00]    | 20.00 [14.00, 34.00]    | 19.00 [13.00, 34.00]    | 0.001   |
| <b>ASAT [U/l], median [IQR]</b>                        | 25.00 [20.00, 35.00]    | 25.50 [20.00, 35.00]    | 25.00 [20.00, 35.00]    | 25.00 [20.00, 34.00]    | 0.007   |
| <b>CRP [mg/l], median [IQR]</b>                        | 12.00 [2.70, 56.00]     | 10.20 [2.00, 54.50]     | 12.90 [3.00, 55.00]     | 16.00 [3.80, 58.35]     | <0.001  |
| <b>CRP [mg/l], n (%)</b>                               |                         |                         |                         |                         | <0.001  |
| < 5                                                    | 7884 (29.1)             | 4575 (32.0)             | 1923 (27.0)             | 1386 (24.4)             |         |
| 5-10                                                   | 2680 (9.9)              | 1354 (9.5)              | 708 (9.9)               | 618 (10.9)              |         |
| 10-50                                                  | 6070 (22.4)             | 2947 (20.6)             | 1633 (22.9)             | 1490 (26.3)             |         |
| >50                                                    | 6116 (22.6)             | 3189 (22.3)             | 1558 (21.9)             | 1369 (24.1)             |         |
| Missing                                                | 4342 (16.0)             | 2222 (15.6)             | 1307 (18.3)             | 813 (14.3)              |         |
| <b>Temperature [°C], median [IQR]</b>                  | 36.55 [36.25, 36.90]    | 36.55 [36.20, 36.90]    | 36.55 [36.23, 36.90]    | 36.60 [36.30, 36.92]    | <0.001  |
| <b>Systolic blood pressure [mmHg], mean (±SD)</b>      | 134.14 (19.77)          | 135.05 (20.35)          | 133.24 (19.10)          | 133.15 (19.14)          | <0.001  |
| <b>Diastolic blood pressure [mmHg], mean (±SD)</b>     | 71.89 (11.67)           | 72.66 (12.19)           | 71.19 (11.09)           | 71.02 (11.05)           | <0.001  |
| <b>BMI, mean (±SD)</b>                                 | 26.10 (5.25)            | 26.20 (5.04)            | 25.92 (5.30)            | 26.09 (5.67)            | 0.01    |
| <b>Polymedication, mean (±SD)</b>                      | 7.58 (3.84)             | 5.93 (3.15)             | 8.13 (3.55)             | 10.24 (3.78)            | <0.001  |
| <b>ACH burden per scale, mean (±SD)</b>                | -                       | 0.00 (0.00)             | 1.39 (0.49)             | 4.98 (2.60)             | <0.001  |

| Supplementary Table S3: Table 1's categorical approach |                         |                         |                         |                         |         |
|--------------------------------------------------------|-------------------------|-------------------------|-------------------------|-------------------------|---------|
|                                                        | Overall                 | ATS No Burden           | ATS Low Burden          | ATS High Burden         | p-value |
| <b>n</b>                                               | 27092                   | 25722                   | 415                     | 955                     |         |
| <b>Died, n (%)</b>                                     | 913 (3.4)               | 797 (3.1)               | 24 (5.8)                | 92 (9.6)                | <0.001  |
| <b>Length of stay, median days [IQR]</b>               | 6.00 [4.00, 10.00]      | 6.00 [4.00, 10.00]      | 8.00 [5.00, 12.00]      | 7.00 [5.00, 12.00]      | <0.001  |
| <b>Age, mean years (±SD)</b>                           | 78.08 (7.69)            | 77.94 (7.66)            | 78.08 (7.64)            | 81.64 (7.66)            | <0.001  |
| <b>Age, n (%)</b>                                      |                         |                         |                         |                         | <0.001  |
| 65-75 years                                            | 10932 (40.4)            | 10563 (41.1)            | 158 (38.1)              | 211 (22.1)              |         |
| 76-85 years                                            | 11012 (40.6)            | 10400 (40.4)            | 188 (45.3)              | 424 (44.4)              |         |
| 86-95 years                                            | 4958 (18.3)             | 4594 (17.9)             | 62 (14.9)               | 302 (31.6)              |         |
| >95 years                                              | 190 (0.7)               | 165 (0.6)               | 7 (1.7)                 | 18 (1.9)                |         |
| <b>Female sex, n (%)</b>                               | 14014 (51.7)            | 13197 (51.3)            | 256 (61.7)              | 561 (58.7)              | <0.001  |
| <b>Department, n (%)</b>                               |                         |                         |                         |                         |         |
| Medical department                                     | 15119 (55.8)            | 14219 (55.3)            | 264 (63.6)              | 636 (66.6)              | <0.001  |
| Surgical department                                    | 11973 (44.2)            | 11503 (44.7)            | 151 (36.4)              | 319 (33.4)              |         |
| <b>Hearing device, n (%)</b>                           |                         |                         |                         |                         | 0.001   |
| None                                                   | 15674 (57.9)            | 14849 (57.7)            | 279 (67.2)              | 546 (57.2)              |         |
| Hearing device                                         | 2976 (11.0)             | 2838 (11.0)             | 42 (10.1)               | 96 (10.1)               |         |
| Missing                                                | 8442 (31.2)             | 8035 (31.2)             | 94 (22.7)               | 313 (32.8)              |         |
| <b>Visual aid, n (%)</b>                               |                         |                         |                         |                         | <0.001  |
| None                                                   | 4956 (18.3)             | 4626 (18.0)             | 88 (21.2)               | 242 (25.3)              |         |
| Glasses or contacts                                    | 13630 (50.3)            | 13000 (50.5)            | 233 (56.1)              | 397 (41.6)              |         |
| Missing                                                | 8506 (31.4)             | 8096 (31.5)             | 94 (22.7)               | 316 (33.1)              |         |
| <b>Acute myocardial infarction, n (%)</b>              | 1442 (5.3)              | 1378 (5.4)              | 21 (5.1)                | 43 (4.5)                | 0.499   |
| <b>Congestive heart failure, n (%)</b>                 | 4751 (17.5)             | 4480 (17.4)             | 67 (16.1)               | 204 (21.4)              | 0.005   |
| <b>Peripheal vascular disease, n (%)</b>               | 3691 (13.6)             | 3497 (13.6)             | 66 (15.9)               | 128 (13.4)              | 0.389   |
| <b>Cerebrovascular disease, n (%)</b>                  | 3462 (12.8)             | 3293 (12.8)             | 40 (9.6)                | 129 (13.5)              | 0.126   |
| <b>Dementia, n (%)</b>                                 | 2595 (9.6)              | 2198 (8.5)              | 35 (8.4)                | 362 (37.9)              | <0.001  |
| <b>COPD, n (%)</b>                                     | 3041 (11.2)             | 2888 (11.2)             | 56 (13.5)               | 97 (10.2)               | 0.198   |
| <b>Rheumatoid disease, n (%)</b>                       | 798 (2.9)               | 760 (3.0)               | 19 (4.6)                | 19 (2.0)                | 0.031   |
| <b>Peptic ulcer disease, n (%)</b>                     | 542 (2.0)               | 520 (2.0)               | 7 (1.7)                 | 15 (1.6)                | 0.558   |
| <b>Liverdisease, n (%)</b>                             | 541 (2.0)               | 511 (2.0)               | 8 (1.9)                 | 22 (2.3)                | 0.785   |
| <b>Diabetes, n (%)</b>                                 | 5692 (21.0)             | 5402 (21.0)             | 83 (20.0)               | 207 (21.7)              | 0.775   |
| <b>Hemiplegia, Paraplegia, n (%)</b>                   | 1232 (4.5)              | 1154 (4.5)              | 20 (4.8)                | 58 (6.1)                | 0.067   |
| <b>Renal dysfunction, n (%)</b>                        | 6176 (22.8)             | 5813 (22.6)             | 91 (21.9)               | 272 (28.5)              | <0.001  |
| <b>Cancer, n (%)</b>                                   | 4625 (17.1)             | 4297 (16.7)             | 142 (34.2)              | 186 (19.5)              | <0.001  |
| <b>Delirium, n (%)</b>                                 | 1695 (6.3)              | 1424 (5.5)              | 22 (5.3)                | 249 (26.1)              | <0.001  |
| <b>Self-care Index, median [IQR]</b>                   | 39.00 [34.00, 40.00]    | 39.00 [35.00, 40.00]    | 36.00 [31.00, 40.00]    | 33.00 [25.00, 38.00]    | <0.001  |
| <b>Braden, median [IQR]</b>                            | 22.00 [20.00, 23.00]    | 22.00 [20.00, 23.00]    | 20.00 [18.00, 22.00]    | 19.00 [17.00, 22.00]    | <0.001  |
| <b>Nutrition deficiency score, median [IQR]</b>        | 1.00 [1.00, 2.00]       | 1.00 [1.00, 2.00]       | 1.00 [1.00, 3.00]       | 2.00 [1.00, 3.00]       | <0.001  |
| <b>Catheterisation, n (%)</b>                          | 7873 (29.1)             | 7423 (28.9)             | 111 (26.7)              | 339 (35.5)              | <0.001  |
| <b>Surgery during stay, n (%)</b>                      | 8676 (32.0)             | 8376 (32.6)             | 94 (22.7)               | 206 (21.6)              | <0.001  |
| <b>GFR [ml/min], median [IQR]</b>                      | 64.00 [45.00, 80.00]    | 64.00 [45.00, 80.00]    | 62.00 [47.00, 83.38]    | 61.00 [41.75, 79.00]    | 0.032   |
| <b>Creatinine [µmol/l], median [IQR]</b>               | 87.00 [70.00, 115.50]   | 87.00 [70.00, 115.50]   | 85.50 [66.12, 108.00]   | 85.00 [66.50, 118.00]   | 0.004   |
| <b>Sodium [mmol/l], median [IQR]</b>                   | 138.00 [135.00, 140.00] | 138.00 [135.00, 140.00] | 138.00 [135.00, 140.00] | 137.50 [135.00, 140.00] | 0.069   |
| <b>Potassium [mmol/l], median [IQR]</b>                | 4.05 [3.80, 4.35]       | 4.05 [3.80, 4.35]       | 4.00 [3.70, 4.35]       | 4.10 [3.75, 4.40]       | 0.202   |
| <b>ALAT [U/l], median [IQR]</b>                        | 20.00 [14.00, 35.00]    | 20.00 [14.00, 35.00]    | 19.00 [13.00, 35.75]    | 19.25 [12.00, 30.00]    | 0.092   |
| <b>ASAT [U/l], median [IQR]</b>                        | 25.00 [20.00, 35.00]    | 25.00 [20.00, 35.00]    | 25.00 [20.00, 36.62]    | 25.00 [19.00, 35.00]    | 0.748   |
| <b>CRP [mg/l], median [IQR]</b>                        | 12.00 [2.70, 56.00]     | 12.00 [2.50, 55.25]     | 16.55 [4.00, 69.00]     | 19.00 [4.00, 65.00]     | <0.001  |
| <b>CRP [mg/l], n (%)</b>                               |                         |                         |                         |                         | <0.001  |
| < 5                                                    | 7884 (29.1)             | 7558 (29.4)             | 103 (24.8)              | 223 (23.4)              |         |
| 5-10                                                   | 2680 (9.9)              | 2536 (9.9)              | 54 (13.0)               | 90 (9.4)                |         |
| 10-50                                                  | 6070 (22.4)             | 5702 (22.2)             | 101 (24.3)              | 267 (28.0)              |         |
| >50                                                    | 6116 (22.6)             | 5753 (22.4)             | 114 (27.5)              | 249 (26.1)              |         |
| Missing                                                | 4342 (16.0)             | 4173 (16.2)             | 43 (10.4)               | 126 (13.2)              |         |
| <b>Temperature [°C], median [IQR]</b>                  | 36.55 [36.25, 36.90]    | 36.55 [36.23, 36.90]    | 36.60 [36.30, 36.90]    | 36.60 [36.30, 37.00]    | 0.006   |
| <b>Systolic blood pressure [mmHg], mean (±SD)</b>      | 134.14 (19.77)          | 134.26 (19.74)          | 130.59 (19.89)          | 132.40 (20.10)          | <0.001  |
| <b>Diastolic blood pressure [mmHg], mean (±SD)</b>     | 71.89 (11.67)           | 71.96 (11.69)           | 70.41 (11.60)           | 70.71 (11.21)           | <0.001  |
| <b>BMI, mean (±SD)</b>                                 | 26.10 (5.25)            | 26.15 (5.24)            | 24.99 (5.19)            | 24.79 (5.61)            | <0.001  |
| <b>Polymedication, mean (±SD)</b>                      | 7.58 (3.84)             | 7.44 (3.79)             | 10.40 (4.11)            | 9.70 (3.85)             | <0.001  |
| <b>ACH burden per scale, mean (±SD)</b>                | -                       | 0.00 (0.00)             | 1.95 (0.45)             | 6.78 (3.98)             | <0.001  |

| Supplementary Table S3: Table 1's categorical approach |                         |                         |                         |                         |         |
|--------------------------------------------------------|-------------------------|-------------------------|-------------------------|-------------------------|---------|
|                                                        | Overall                 | DRS No Burden           | DRS Low Burden          | DRS High Burden         | p-value |
| <b>n</b>                                               | 27092                   | 13523                   | 7875                    | 5694                    |         |
| <b>Died, n (%)</b>                                     | 913 (3.4)               | 346 (2.6)               | 252 (3.2)               | 315 (5.5)               | <0.001  |
| <b>Length of stay, median days [IQR]</b>               | 6.00 [4.00, 10.00]      | 6.00 [4.00, 9.00]       | 7.00 [4.00, 10.00]      | 8.00 [5.00, 12.00]      | <0.001  |
| <b>Age, mean years (±SD)</b>                           | 78.08 (7.69)            | 77.62 (7.62)            | 78.25 (7.66)            | 78.94 (7.80)            | <0.001  |
| <b>Age, n (%)</b>                                      |                         |                         |                         |                         | <0.001  |
| 65-75 years                                            | 10932 (40.4)            | 5782 (42.8)             | 3111 (39.5)             | 2039 (35.8)             |         |
| 76-85 years                                            | 11012 (40.6)            | 5423 (40.1)             | 3212 (40.8)             | 2377 (41.7)             |         |
| 86-95 years                                            | 4958 (18.3)             | 2230 (16.5)             | 1492 (18.9)             | 1236 (21.7)             |         |
| >95 years                                              | 190 (0.7)               | 88 (0.7)                | 60 (0.8)                | 42 (0.7)                |         |
| <b>Female sex, n (%)</b>                               | 14014 (51.7)            | 6470 (47.8)             | 4296 (54.6)             | 3248 (57.0)             | <0.001  |
| <b>Department, n (%)</b>                               |                         |                         |                         |                         |         |
| Medical department                                     | 15119 (55.8)            | 7341 (54.3)             | 4231 (53.7)             | 3547 (62.3)             | <0.001  |
| Surgical department                                    | 11973 (44.2)            | 6182 (45.7)             | 3644 (46.3)             | 2147 (37.7)             |         |
| <b>Hearing device, n (%)</b>                           |                         |                         |                         |                         | <0.001  |
| None                                                   | 15674 (57.9)            | 7372 (54.5)             | 4832 (61.4)             | 3470 (60.9)             |         |
| Hearing device                                         | 2976 (11.0)             | 1391 (10.3)             | 930 (11.8)              | 655 (11.5)              |         |
| Missing                                                | 8442 (31.2)             | 4760 (35.2)             | 2113 (26.8)             | 1569 (27.6)             |         |
| <b>Visual aid, n (%)</b>                               |                         |                         |                         |                         | <0.001  |
| None                                                   | 4956 (18.3)             | 2315 (17.1)             | 1448 (18.4)             | 1193 (21.0)             |         |
| Glasses or contacts                                    | 13630 (50.3)            | 6409 (47.4)             | 4299 (54.6)             | 2922 (51.3)             |         |
| Missing                                                | 8506 (31.4)             | 4799 (35.5)             | 2128 (27.0)             | 1579 (27.7)             |         |
| <b>Acute myocardial infarction, n (%)</b>              | 1442 (5.3)              | 804 (5.9)               | 363 (4.6)               | 275 (4.8)               | <0.001  |
| <b>Congestive heart failure, n (%)</b>                 | 4751 (17.5)             | 1905 (14.1)             | 1469 (18.7)             | 1377 (24.2)             | <0.001  |
| <b>Peripheal vascular disease, n (%)</b>               | 3691 (13.6)             | 1647 (12.2)             | 1085 (13.8)             | 959 (16.8)              | <0.001  |
| <b>Cerebrovascular disease, n (%)</b>                  | 3462 (12.8)             | 1981 (14.6)             | 814 (10.3)              | 667 (11.7)              | <0.001  |
| <b>Dementia, n (%)</b>                                 | 2595 (9.6)              | 945 (7.0)               | 691 (8.8)               | 959 (16.8)              | <0.001  |
| <b>COPD, n (%)</b>                                     | 3041 (11.2)             | 1200 (8.9)              | 979 (12.4)              | 862 (15.1)              | <0.001  |
| <b>Rheumatoid disease, n (%)</b>                       | 798 (2.9)               | 225 (1.7)               | 287 (3.6)               | 286 (5.0)               | <0.001  |
| <b>Peptic ulcer disease, n (%)</b>                     | 542 (2.0)               | 288 (2.1)               | 147 (1.9)               | 107 (1.9)               | 0.317   |
| <b>Liverdisease, n (%)</b>                             | 541 (2.0)               | 262 (1.9)               | 158 (2.0)               | 121 (2.1)               | 0.696   |
| <b>Diabetes, n (%)</b>                                 | 5692 (21.0)             | 2211 (16.3)             | 1856 (23.6)             | 1625 (28.5)             | <0.001  |
| <b>Hemiplegia, Paraplegia, n (%)</b>                   | 1232 (4.5)              | 676 (5.0)               | 278 (3.5)               | 278 (4.9)               | <0.001  |
| <b>Renal dysfunction, n (%)</b>                        | 6176 (22.8)             | 2746 (20.3)             | 1843 (23.4)             | 1587 (27.9)             | <0.001  |
| <b>Cancer, n (%)</b>                                   | 4625 (17.1)             | 2346 (17.3)             | 1394 (17.7)             | 885 (15.5)              | 0.002   |
| <b>Delirium, n (%)</b>                                 | 1695 (6.3)              | 695 (5.1)               | 384 (4.9)               | 616 (10.8)              | <0.001  |
| <b>Self-care Index, median [IQR]</b>                   | 39.00 [34.00, 40.00]    | 40.00 [36.00, 40.00]    | 39.00 [34.00, 40.00]    | 36.00 [30.00, 39.00]    | <0.001  |
| <b>Braden, median [IQR]</b>                            | 22.00 [20.00, 23.00]    | 23.00 [21.00, 23.00]    | 22.00 [20.00, 23.00]    | 21.00 [18.00, 23.00]    | <0.001  |
| <b>Nutrition deficiency score, median [IQR]</b>        | 1.00 [1.00, 2.00]       | 1.00 [1.00, 1.00]       | 1.00 [1.00, 2.00]       | 1.00 [1.00, 2.00]       | <0.001  |
| <b>Catheterisation, n (%)</b>                          | 7873 (29.1)             | 4091 (30.3)             | 2149 (27.3)             | 1633 (28.7)             | <0.001  |
| <b>Surgery during stay, n (%)</b>                      | 8676 (32.0)             | 4652 (34.4)             | 2608 (33.1)             | 1416 (24.9)             | <0.001  |
| <b>GFR [ml/min], median [IQR]</b>                      | 64.00 [45.00, 80.00]    | 65.00 [46.00, 81.00]    | 63.00 [45.00, 80.00]    | 62.00 [43.00, 80.00]    | 0.001   |
| <b>Creatinine [µmol/l], median [IQR]</b>               | 87.00 [70.00, 115.50]   | 87.00 [71.00, 115.00]   | 87.00 [70.00, 115.25]   | 87.00 [69.00, 117.00]   | 0.094   |
| <b>Sodium [mmol/l], median [IQR]</b>                   | 138.00 [135.00, 140.00] | 138.00 [135.88, 140.00] | 138.00 [135.00, 140.00] | 138.00 [135.00, 140.00] | <0.001  |
| <b>Potassium [mmol/l], median [IQR]</b>                | 4.05 [3.80, 4.35]       | 4.05 [3.80, 4.30]       | 4.05 [3.80, 4.36]       | 4.10 [3.75, 4.40]       | 0.054   |
| <b>ALAT [U/l], median [IQR]</b>                        | 20.00 [14.00, 35.00]    | 21.00 [14.00, 36.00]    | 20.00 [14.00, 35.00]    | 19.00 [13.00, 35.00]    | 0.032   |
| <b>ASAT [U/l], median [IQR]</b>                        | 25.00 [20.00, 35.00]    | 26.00 [20.00, 36.00]    | 25.00 [20.00, 35.00]    | 25.00 [20.00, 34.00]    | <0.001  |
| <b>CRP [mg/l], median [IQR]</b>                        | 12.00 [2.70, 56.00]     | 9.05 [2.00, 49.00]      | 13.30 [3.00, 59.00]     | 18.90 [4.30, 65.00]     | <0.001  |
| <b>CRP [mg/l], n (%)</b>                               |                         |                         |                         |                         | <0.001  |
| < 5                                                    | 7884 (29.1)             | 4414 (32.6)             | 2163 (27.5)             | 1307 (23.0)             |         |
| 5-10                                                   | 2680 (9.9)              | 1279 (9.5)              | 789 (10.0)              | 612 (10.7)              |         |
| 10-50                                                  | 6070 (22.4)             | 2718 (20.1)             | 1833 (23.3)             | 1519 (26.7)             |         |
| >50                                                    | 6116 (22.6)             | 2750 (20.3)             | 1846 (23.4)             | 1520 (26.7)             |         |
| Missing                                                | 4342 (16.0)             | 2362 (17.5)             | 1244 (15.8)             | 736 (12.9)              |         |
| <b>Temperature [°C], median [IQR]</b>                  | 36.55 [36.25, 36.90]    | 36.52 [36.20, 36.90]    | 36.57 [36.25, 36.90]    | 36.60 [36.30, 36.95]    | <0.001  |
| <b>Systolic blood pressure [mmHg], mean (±SD)</b>      | 134.14 (19.77)          | 135.02 (20.37)          | 133.67 (19.15)          | 132.88 (19.19)          | <0.001  |
| <b>Diastolic blood pressure [mmHg], mean (±SD)</b>     | 71.89 (11.67)           | 72.87 (12.27)           | 71.27 (11.08)           | 70.66 (10.98)           | <0.001  |
| <b>BMI, mean (±SD)</b>                                 | 26.10 (5.25)            | 26.05 (4.91)            | 26.09 (5.28)            | 26.23 (5.93)            | 0.213   |
| <b>Polymedication, mean (±SD)</b>                      | 7.58 (3.84)             | 5.67 (3.04)             | 8.04 (3.38)             | 10.55 (3.71)            | <0.001  |
| <b>ACH burden per scale, mean (±SD)</b>                | -                       | 0.00 (0.00)             | 1.45 (0.50)             | 4.86 (2.34)             | <0.001  |
